1 ***Trichoderma asperelloides* enhances local (LAR) and systemic**  
2 **acquired resistance (SAR) response under low nitrate nutrition in**  
3 ***Arabidopsis***

4 Aakanksha Wany, Pradeep K. Pathak, Kapuganti Jagadis Gupta \*

5 National Institute of Plant Genome Research, Aruna Asaf Ali Marg, 110067, New  
6 Delhi, India

7

8 **Correspondence**

9 \*Kapuganti Jagadis Gupta

10 Phone: +91-11-26735111

11 Email: [jgk@nipgr.ac.in](mailto:jgk@nipgr.ac.in)

12

13 Total word count: 6431

14 Introduction: 806

15 Material and Methods: 829

16 Results:3217

17 Discussion: 1518

18 Acknowledgements 59

19 Number of Figures: 15 (All figures in color)

20 Supporting Information: 4 Figures and 1 Table

21

22

23

24

25

26

27

## 28 **Summary**

- 29 • Nitrogen (N) is essential for growth, development and defense but, how low N  
30 effects defense and the role of *Trichoderma* in enhancing defense under low  
31 nitrate is not known
  
- 32 • Low nitrate fed Arabidopsis plants displayed reduced growth and  
33 compromised LAR & SAR response when infected with avirulent and virulent  
34 *Pseudomonas syringae* DC3000. These responses were enhanced in the  
35 presence of *Trichoderma*. The mechanism of increased LAR and SAR  
36 mediated by *Trichoderma* involve increased N uptake and enhanced protein  
37 levels via modulation of nitrate transporter genes. *nrt2.1* mutant is  
38 compromised in LAR and SAR response suggesting a link between enhanced  
39 N transport and defense.
  
- 40 • Enhanced N uptake was mediated by *Trichoderma* elicited nitric oxide (NO).  
41 Low NO producing *nia1,2* mutant and *nsHb<sup>+</sup>* over expressing lines were  
42 unable to induce nitrate transporters and compromised defense in presence  
43 of *Trichoderma* under low N suggesting a signaling role of *Trichoderma*  
44 elicited NO. *Trichoderma* also induced SA and defense gene expression  
45 under low N. SA deficient *NahG* and *npr1* mutants were compromised in LAR  
46 and SAR response.
  
- 47 • The mechanism of enhanced plant defense under low N mediated by  
48 *Trichoderma* involve NO, ROS, SA production and induction of NRT and SAR  
49 marker genes.

50

51

52

53

54

55

56 **Key words:** Nitric oxide, nitrate transporters, *Pseudomonas syringae*, SAR,  
57 *Trichoderma*

58

## 59 Introduction

60 Nitrogen (N) is essential for growth and development of plants. It is a crucial  
61 component in the chlorophyll, nucleic acids and amino acids. N plays an important  
62 role in operation of primary and secondary metabolism and also involved in  
63 protection of plants against biotic and abiotic stresses (O'Brien *et al.* 2016; Mur *et al.*  
64 2017). N deficiency occurs in soil due to slow mineralization, lack of sufficient  
65 organic matter, leaching due to heavy rainfalls and increased activities of denitrifying  
66 bacteria. Low N can retard the growth of plants and cause severe physiological and  
67 morphological defects (Walker *et al.* 2001; Landrein *et al.* 2018). To cope with this,  
68 plants have evolved N uptake systems to support their survival under N deficiency  
69 (Li *et al.* 2017). These uptake systems are based on their affinity with nitrates ( $\text{NO}_3^-$ )  
70 mediated by the family of low and high affinity nitrate transporter proteins (LATs &  
71 HATs; Tsay *et al.* 2007).

72 N plays a very significant role in plant defense (Gupta *et al.* 2013; Mur *et al.*  
73 2017). Hence, operation of efficient N transport system can help plants to defend  
74 against pathogens. These defense responses involve activation of innate immune  
75 response comprising of PTI (PAMP Triggered Immunity) and ETI (Effector-Triggered  
76 Immunity) (Alves *et al.* 2014; Jones and Dangl 2006) and requires N. The defense  
77 mechanism for invading pathogen importantly includes rapid programmed cell death  
78 known as the hypersensitive response (HR), which develops during incompatible  
79 plant-pathogen (*R-avr*) interactions (Delledonne *et al.* 1998). An early characteristic  
80 of HR is the rapid generation of superoxide ( $\text{O}_2^-$ ), nitric oxide (NO) and accumulation  
81 of  $\text{H}_2\text{O}_2$  (Lamb and Dixon, 1997). Moreover, SA produced during HR, plays an  
82 important role in plant defense (Mur *et al.* 2000, 2008; Gupta *et al.* 2013). The host  
83 mobilizes salicylic acid (SA) for the plant defense (Oliva and Quibod 2017, Mur *et al.*  
84 2017) and this pathway itself requires N for synthesis of various intermediates  
85 leading to SA production. Thus, N not only improves the nutritional status of the  
86 plant, but, also its concentration plays a role in defense. Moreover, the form of N  
87 nutrition can greatly influence the HR-mediated resistance in plants (Gupta *et al.*  
88 2013).

89 Nitrate ( $\text{NO}_3^-$ ) nutrition greatly influences HR via the production of NO which is  
90 a regulatory signal in plant defense (Delledonne *et al.* 1998). NO production depends  
91 on  $\text{NO}_3^-$ . Therefore, N deficiency can also lead to reduced levels of NO. SA is known

92 to be induced by NO, hence, low N leads to low NO and reduced SA levels. Since  
93 NO production also requires NO<sub>3</sub><sup>-</sup>, it may also play a role in systemic acquired  
94 resistance (SAR) which results in broad-spectrum disease resistance against  
95 secondary infections after primary infection (Cameron *et al.* 1994, 1999). SAR  
96 develops either as a consequence of HR where NO has its proven role (Delledonne  
97 *et al.* 1998), or in the course of a compatible interaction resulting in disease  
98 development (Gupta *et al.* 2014). SAR is dependent on SA or its derivatives (Park *et al.*  
99 *et al.* 2007, Metraux *et al.* 1990) and PR gene expression (Ryals *et al.* 1996).  
100 Previously, it was shown that NO plays a role in nitrate uptake/assimilation during  
101 stress by modulating nitrate transporters (Frungillo *et al.* 2013). Thus, N plays  
102 multifaceted roles in plant defense.

103 Therefore, any mechanism that can increase N uptake may assist in plant  
104 defense under low NO<sub>3</sub><sup>-</sup>. Many plant symbiotic microbes such as mycorrhiza,  
105 *Trichoderma*, PGPR are known to increase nutrient uptake. However, the operation  
106 of plant defense under low N and the effect of these microbes in increasing plant  
107 defense under N deficiency is not known.

108 Several species of *Trichoderma* play an important role in plant growth  
109 promotion and resistance against various biotic and abiotic stresses. They confer  
110 resistance to plants via various mechanisms such as mycoparasitism, activation of  
111 basal and induced systemic resistance response (ISR). Previously, it was  
112 demonstrated that roots colonized by *Trichoderma* species can activate defense  
113 responses very rapidly and intensively via priming in *Arabidopsis* (Brotman *et al.*  
114 2012). This occurs via modulation of transcription factors and key metabolites of  
115 plant defense (Shoresh *et al.* 2010). Upon pathogen attack, *Trichoderma* treated  
116 plants show accumulated transcript levels of *PAL* (Yedidia *et al.* 2003) and increased  
117 levels of defense-related plant enzymes (Shoresh *et al.* 2005).

118 If *Trichoderma* enhances N uptake, it can have positive effect on plant  
119 defense via LAR and SAR responses altogether. So far is it not known whether  
120 *Trichoderma* can increase plant defense under low N. Therefore, in the present  
121 study, we have assessed, the systemic defense response of low N fed *Arabidopsis*  
122 *thaliana* plants to the phytopathogen; *Pseudomonas syringae* p.v. tomato DC3000  
123 induced by the beneficial fungus *Trichoderma asperelloides* (T203) under low and

124 optimum nitrate concentrations. Here, we describe that *T203* enhances SAR  
125 response in *Arabidopsis* grown under low N via modulating nitrate transporters and  
126 this mechanism involves both NO and SA.

## 127 **Material and Methods**

### 128 **Plant material and growth conditions**

129 Seeds of *Arabidopsis thaliana* ecotype Columbia 0 (*Col0*; WT) was sown in  
130 plastic pots (10 cm diameter) containing soilrite: agropeat (1:1) mix (mix contains  
131 zero N) and stratified at 4°C in dark for 48 h. Then, the pots were kept in growth  
132 room under short day conditions (8h-light, 16h-dark), 22/18°C (day/night)  
133 temperatures, relative humidity of 60% and 200  $\mu\text{E m}^{-2} \text{s}^{-1}$  light intensity. Initially,  
134 plants were bottom irrigated for a week, once with half strength Hoagland solution  
135 and once with water. Then, 0.1 and 3 mM  $\text{NO}_3^-$  concentrations were given to the  
136 growing plants weekly. The  $\text{NO}_3^-$  nutrient solution in Hoagland's media contained  
137 either 0.1 mM or 3 mM  $\text{KNO}_3$ , according to modified Hoagland's nutrient solution  
138 (Hoagland and Arnon 1950). 30-36 day old plants with fully developed rosette were  
139 used for the experiments. The seeds of *nrt2.1* (SALK\_035429C) and *nia1,2*  
140 (NASC\_6936) were procured from ABRC.

141

### 142 ***Trichoderma* supplementation**

143 *T. asperelloides* (*T203* strain) was grown on potato dextrose agar (PDA;  
144 Himedia) plates for 15 days under low light conditions until sporulation. Conidia were  
145 harvested by gently scraping the petridish and poured with 10 ml of sterile water.  
146 The spores were evaluated up to  $1 \times 10^9$  spores/ml. It was thoroughly mixed into the  
147 soilrite mix and distributed into the individual plastic pots.

148

### 149 **Bacterial strain and growth conditions**

150 *Pseudomonas syringae* pv. tomato DC3000 (*Pst*DC3000; *avrRpm1*, avirulent)  
151 were grown in King's B (KB) medium containing 50  $\mu\text{g ml}^{-1}$  rifampicin. Primary and  
152 secondary culture was prepared. The avirulent bacterial density was adjusted to  
153  $2 \times 10^7$  CFU  $\text{ml}^{-1}$  for primary inoculations and virulent *P. syringae* was used at  $2 \times 10^6$   
154 CFU  $\text{ml}^{-1}$  for challenge inoculations.

155

### 156 **Bacterial infiltration in leaves**

157 Mock infiltration (control) was performed with 10 mM MgCl<sub>2</sub>. *Pst* inoculations  
158 were made by syringe infiltration on the abaxial side of the leaves manually. There  
159 were total four groups of plants; Group 1: 0.1 mM + MgCl<sub>2</sub> plants, Group 2: 3 mM +  
160 MgCl<sub>2</sub> plants, Group 3: 0.1 mM + *Pst* plants and Group 4: 3 mM + *Pst* plants. Each  
161 group consisted of 20-25 plants. SAR experiment initiated with primary inoculation  
162 (*avrRpm1 Pst* DC3000) on one leaf per plant, and the secondary challenge  
163 inoculation with (virulent *P. syringae*) on 4 other (distant) leaves per plant, leaving 5-  
164 6 healthy un-inoculated leaves per plant (Cameron *et al.* 1999) after 2 days of  
165 primary inoculation. The Inoculated (I) and un-inoculated (U) leaves from each  
166 treatment were harvested (Fig. **S1**) for RNA extraction and other experiments post  
167 challenge inoculation. Leaves were analyzed for 0, 6, 24 and 48 hours post  
168 inoculation (hpi) or challenge (hpc) and the symptoms was determined periodically.

169

#### 170 **Electrolyte leakage**

171 Leaf discs (5 mm diameter) were taken and electrolyte leakage was  
172 monitored as described in (Gupta *et al.* 2013).

173

#### 174 ***In planta* bacterial number quantification assay**

175 Bacterial number in leaves from *Pst* treated plants during LAR and SAR was  
176 assessed was calculated as per Gupta *et al.* (2016).

177

#### 178 **Expression profiling by qRT-PCR**

179 The inoculated and uninoculated leaves were immediately frozen in liquid  
180 nitrogen and stored at -80°C. RNA extraction, cDNA synthesis and qPCR was  
181 performed according to Wany *et al.* (2017; 2018). The synthesized cDNAs were  
182 used as templates in qRT-PCRs using primers given in Table S1. Fold change in the  
183 target genes was normalized to *Arabidopsis* reference genes; ubiquitin, *18sRNA*  
184 (GQ380689) and *YSL8* gene (X69885.1). Fold expression relative to control  
185 treatment was determined by  $\Delta\Delta CT$  values. Three biological experiments (with three  
186 independent replicates for each experiment) were performed for each treatment. The  
187 comparisons of the gene expression between the different treatments to control was  
188 performed by student's t-test. Differences between the treatments with  $p < 0.05$ ,  
189  $p < 0.01$  and  $p < 0.001$  were considered significant.

190

191 **Ex- vivo NO estimation**

192 For this experiment, NO was measured from the following five different  
193 combinations in roots; 1. WT; 2. WT + *T203* (*Trichoderma*); 3. *nia1,2* double mutants  
194 + *T203*; 4. WT + cPTIO (carboxy-PTIO potassium salt); 5. WT + cPTIO + *T203*. WT  
195 and *nia1,2* plants were grown for one week in plates containing 0.1 mM and 3 mM  
196 NO<sub>3</sub><sup>-</sup> concentrations. The spore suspension of *Trichoderma* was poured over these  
197 7d old plants and incubated for 2 minutes, 10 minutes and 24 hours. Then, the roots  
198 were incubated in 10 μM DAF-FM DA (4-amino-5-methylamino- 2',7'-  
199 difluorofluorescein diacetate) in 100 mM HEPES buffer (pH 7.2) placed in a 1.5 ml  
200 tube, incubated for 15 minutes in dark and photographed using fluorescence  
201 microscope (Nikon80i, Japan) at 495 nm excitation and 515 nm emission  
202 wavelength.

203

204 **Determination of ROS levels**

205 Production of hydrogen peroxide (H<sub>2</sub>O<sub>2</sub>) in inoculated and un-inoculated  
206 leaves was detected by Diaminobenzidine tetrahydrochloride (DAB) staining as per  
207 Daudi *et al.* (2012) with slight modifications. The superoxide levels were measured  
208 by *in vivo* staining with Nitroblue tetrazolium chloride (NBT, SA, USA) (Jambunathan  
209 2010).

210

211 **Histochemical detection of HR**

212 Hypersensitive cell death in inoculated leaves was visualized by trypan blue  
213 staining method according to Fernández-Bautista *et al.* (2002).

214

215 **SA levels**

216 The SA levels were measured by HPLC according to the protocol described in  
217 Singh *et al.* (2013).

218

219 **Results**

220 **Optimal and low nitrate effects LAR and SAR differently**

221 Nitrogen plays important role in plant defense, hence, we first tested the effect  
222 of low nitrate on LAR and SAR response. For this purpose, WT plants were grown



223 under optimum (3 mM) and low (0.1 mM)  $\text{NO}_3^-$  conditions and infected with *P.*  
224 *syringae* DC3000 (*avrRpm1*) and observed local HR at different time points. As  
225 shown in Fig. **1a** (lower panel) within 24 hpi, the 3 mM  $\text{NO}_3^-$ -fed plants showed HR  
226 (lesion formation) at the inoculation sites and it was enhanced till 48 hpi (Fig. **1a**)  
227 whereas 0.1 mM  $\text{NO}_3^-$  plants showed chlorotic lesions at the site of inoculation at 24  
228 hpi and these spots were enhanced in 48 hpi. Electrolyte leakage (EL) (Fig. **1b**) was  
229 more rapid in 3 mM *Pst* infiltrated plants than 0.1 mM plants which is in accordance  
230 with HR response. A significant increase in CFU count was observed in 0.1 mM  
231 grown plants at 48 hpi in comparison to bacterial numbers in 3 mM grown plants  
232 (Fig. **1c**). We further found that, the *PR1* (a marker for HR) transcript levels have  
233 increased in 3 mM *Pst* treated plants (up to 25 fold till 48hpi), but in 0.1 mM WT  
234 plants, this gene was not at all induced at 48 hpi (Fig. **1d**). Taken together these  
235 results suggest that low  $\text{NO}_3^-$  grown plants are compromised with HR linked LAR  
236 response.

237 After observing LAR, we studied SAR (Fig. **S1b**; Cameron *et al.* 1994 and  
238 1999). Three days post-secondary challenge with virulent *Pst* DC3000, EL, CFU and  
239 *PR1* gene expression were assessed. During the primary inoculation, symptoms  
240 were visible after 24 and 48 hpi in 3 mM *Pst*-treated leaves, than 0.1 mM *Pst*-treated  
241 leaves (Fig. **2a**-first panel), which showed enhanced chlorotic and necrotic  
242 symptoms. Three days after secondary challenge, disease symptoms were observed  
243 from 0 to 48 hpc. 0.1 mM *Pst*-challenged plants show more prominent necrotic and  
244 dark yellow lesions spread to both sides of the leaf (Fig. **2a**-second panel) confirming  
245 susceptible symptoms (yellow specks) whereas 3 mM grown plants showed reduced  
246 yellowing and necrotic symptoms. This clearly suggests that, 3 mM  $\text{NO}_3^-$  plants  
247 defended better during secondary challenge than 0.1 mM  $\text{NO}_3^-$  plants suggesting  
248 that optimal N is required for SAR development.

249 Trypan blue images of inoculated and uninoculated leaves are shown in Fig.  
250 **2b**. It was observed that, after 3 days post challenge, the cell death observed in *Pst*  
251 infiltrated tissues of 0.1 mM  $\text{NO}_3^-$  plants is profoundly less in comparison to 3 mM  
252  $\text{NO}_3^-$  plants till 24 hpc. At 48 hpc, there was increased cell death in both 0.1 and 3  
253 mM inoculated leaves but cell death phenotype is different. Interestingly, the  
254 uninoculated leaves of 0.1 and 3 mM WT plants, showed small and uniform spread  
255 of macrobursts throughout the leaf blades spread unanimously over the leaf, in all  
256 the time points, in exception that, 3 mM leaves displayed slightly larger macrobursts



257 (Fig. **2b**). This suggests that during SAR establishment, the mobile signal perceived  
258 by the uninoculated leaves results in the occurrence of low frequency microscopic  
259 HRs (Cameron *et al.* 1999; Alvarez *et al.* 1998).

260 Then, we assessed EL (Fig. **2c**), we found leakage was significantly higher in  
261 3 mM plants than 0.1 mM plants in both the cases (1° and 2°). But, much higher EL  
262 was observed during 2° challenge (Fig. **2c-right panel**). Mock inoculated plants  
263 showed moderate EL in both 0.1 mM and 3 mM plants (Fig. **S2a**). Higher bacterial  
264 growth was observed in 0.1 mM *Pst* treated plants as expected till 72 hpc, while  
265 there was a significant reduction in the bacterial numbers in 3 mM *Pst* inoculated  
266 plants (Fig. **2d**).

### 267 **Low LAR under low nitrogen is reversed by *Trichoderma***

268 Next, we investigated whether *Trichoderma asperelloides* plays a role in  
269 improving LAR and SAR response under low NO<sub>3</sub><sup>-</sup> availability. Interestingly, we  
270 found that under 0.1 mM NO<sub>3</sub><sup>-</sup>, *Trichoderma* treated plants displayed healthy  
271 phenotype than untreated plants (absence of *Trichoderma*) (Fig. **S1a**), this enhanced  
272 growth was linked to increased leaf number, fresh weight and total chlorophyll  
273 content (Fig. **S2b,c,d**). During LAR, *Trichoderma* grown 0.1 mM NO<sub>3</sub><sup>-</sup> plants did not  
274 show any severe disease symptoms, rather they mimicked the HR phenotype of 3  
275 mM plants and showed resistance (Fig. **3a**). This suggests that *Trichoderma*  
276 provides resistance under low N stress (Compare Fig. **3a** with Fig. **1a**). EL was  
277 significantly higher in both 3 mM and 0.1 mM *Trichoderma* treated plants (Fig. **3b**) in  
278 comparison to untreated plants (Compare Fig. **3b** with Fig. **1b**). As shown in Fig. **3c**  
279 there was a significant reduction in the bacterial count in 0.1 mM *Pst* plants at 24 hpi,  
280 suggesting that *Trichoderma* enhances LAR response under low N. The higher  
281 accumulation of *PR1* transcripts in both 0.1 mM (~9 folds at 48 hpi) and 3 mM (~28  
282 folds at 48 hpi) in *Trichoderma* grown *Pst* treated plants (Compare Fig. **3d** with Fig.  
283 **1d**) again providing evidence that *Trichoderma* can enhance LAR under low N.

### 284 ***Trichoderma* can induce SAR under low N**

285 During SAR assay, the *T203* treated 0.1 mM plants have shown clear  
286 resistant phenotype at 24 and 48 hpc (Compare Fig. **4a** left panel with Fig. **2a** left  
287 panel). During secondary challenge also, there was complete reduction in yellowing  
288 in *T203* grown 0.1 mM plants in comparison to untreated plants (Compare Fig. **4a**

289 right panel with Fig. **2a** right panel). In response to *T203*, 0.1 mM NO<sub>3</sub><sup>-</sup> plants  
290 showed more Trypan blue spots during secondary challenge. Upon infection, cell  
291 death spots were more widely spread in these leaves (Compare Fig. **4b** with Fig. **2b**  
292 and Fig. **S3a,b**). EL was significantly higher (~4 fold) in both 0.1 and 3 mM *T203*  
293 treated plants during 2° challenge, in comparison to 1° inoculation at 24 and 48 hpc  
294 (Fig. **4c**). This suggests that *T203* treatment primes the defense responses in the  
295 uninoculated leaves immediately at 0 hpi and after 2° challenge. Bacterial count was  
296 in accordance with EL that, the *Pst* population decreased significantly in *T203*  
297 treated low N-fed plants, suggesting that *T203* imparts enhanced resistance to the  
298 NO<sub>3</sub><sup>-</sup> stressed plants (compare Fig. **4d** with Fig **2d**).

### 299 ***Trichoderma* activates nitrate transporters, facilitates N uptake and promotes** 300 **SAR in low N-fed plants**

301 Increased LAR and SAR response under low NO<sub>3</sub><sup>-</sup> in the presence of  
302 *Trichoderma* is probably due to increased nutrient uptake facilitated by *Trichoderma*  
303 as these responses are absent in *Trichoderma* untreated plants. Increased nitrate  
304 transport is probably the reason for resistance hence, we checked the expression of  
305 both LATs (*CLC-A*, *NPF1.2*) and HATs (*NRT2.1*, *NRT2.2* and *NRT2.4*).

306 *CLCa* (the chloride channel family) is a tonoplast located antiporter channel  
307 system which drives nitrate accumulation in the vacuoles (Krapp *et al.* 2014). It was  
308 observed that, under low NO<sub>3</sub><sup>-</sup>, *CLCa* is less inducible in *Pst* treated plants whereas  
309 it was significantly upregulated in *T203* grown 0.1 mM *Pst* treated plants. The  
310 uninoculated leaves of 0.1 mM *T203* grown WT plants showed slight induction of  
311 *CLCa* in comparison to non-*T203* grown plants (Compare Fig. **5a,b**). We further  
312 checked the expression of *NPF1.2*; which belongs to NRT1 (peptide transporter)  
313 family of nitrate transporters (Fig. **5c**) and is involved in the transfer of xylem-borne  
314 nitrate to the phloem in the petiole (Krapp *et al.* 2014). It was found that, in *Pst*  
315 treated 3 mM WT plants, *NPF1.2* levels were highly induced till 48 hpc, in  
316 comparison to 0.1 mM *Pst* inoculated leaves (Fig. **5c**). This might be the reason  
317 behind resistance of 3 mM plants and susceptibility of 0.1 mM plants after pathogen  
318 challenge. But, upon *T203* pre-treatment, *NPF1.2* transcript levels in *Pst*-inoculated  
319 0.1 mM plants (Fig. **5d**), showed significant induction in comparison to same  
320 treatment without *T203* (Compare Fig. **5c & 5d**). This suggests that, *T203* may cause  
321 the regulation of *NPF1.2*.

322 *NRT2* transporters (*NRT2.1*, *NRT2.2* and *NRT2.4*) are HATS and gets  
323 activated at low N concentrations (<1 mM). Previously, it was shown that *NRT2.1* is  
324 active only under N starving conditions (Dechorgnat *et al.* 2012). Under low NO<sub>3</sub><sup>-</sup>  
325 conditions, *NRT2.1* is significantly induced in all treatments in *T203* grown *Pst*  
326 treated plants in comparison to untreated plants where there was already an  
327 induction of this gene at early time points (Fig. **6a,b**). The SAR establishment stage  
328 represented by uninoculated leaves showed dynamic and hiked up-regulation of  
329 *NRT2.1* transcripts (Fig. **6b**). This revealed that, *T203* colonization benefits the plant  
330 by facilitating the N supply even in low NO<sub>3</sub><sup>-</sup> conditions thereby showing improved  
331 plant defense mediating SAR. A similar expression pattern was observed in *NRT2.2*  
332 expression levels 0.1 mM in uninoculated and inoculated plants (Fig. **6c**) and the  
333 expression was further accelerated several folds in the presence of *Trichoderma*  
334 (Fig. **6d**). This again revealed that faster N uptake by *T203* treated low NO<sub>3</sub><sup>-</sup> plants  
335 can help to defend better. Consequently, we checked *NRT2.4* expression levels in  
336 both set of treatments. This gene showed early induction in 0.1 mM *Pst* treated in  
337 inoculated and uninoculated plants (Fig. **6e**) and the expression pattern was similar  
338 in response to *T203* treatment at early stages but a slight induction can be seen  
339 even at later time points (Fig. **6f**).

340 Taken together, these results suggests that *Trichoderma* induces HATs to  
341 facilitate N uptake under low NO<sub>3</sub><sup>-</sup> conditions. To confirm the role of HATs in  
342 increasing plant defense via N uptake, we checked the *PR1* expression in WT and  
343 *nrt2.1* mutants. The expression of *PR1* gene in *Trichoderma* inoculated plants  
344 increased 12-13 folds in 24 h but in the case of *nrt2.1* mutant (Fig. **6g**), it was not at  
345 all induced suggesting that *NRT2.1* plays an important role in increasing plant  
346 defense under low N mediated by *Trichoderma*. Then, we further found that in *nrt2.1*  
347 mutant, the expression of *NRT2.2* gene also suppressed in both control and  
348 *Trichoderma* treatment (Fig. **6h**) suggesting that *NRT2.1* is mainly responsible for  
349 increasing N uptake under low NO<sub>3</sub><sup>-</sup> facilitated by *Trichoderma*. Then, we checked  
350 the protein levels in WT and *nrt2.1* mutant in the presence or absence of  
351 *Trichoderma* under low NO<sub>3</sub><sup>-</sup>. In response to *Trichoderma*, protein levels have  
352 increased in WT, whereas in *nrt2.1* mutant protein levels were less than WT but upon  
353 *T203* treatment only slight increase was observed (Fig. **6i**). These result suggests  
354 that *T203* application can increase nitrate transport thus responsible for increased  
355 protein levels.

356 ***Trichoderma* elicits NO production during early stages of inoculation which is**  
357 **required for induction of HATs and *PR* gene expression**

358 Previously, it was shown that *Trichoderma* elicits NO at early stages (Gupta *et*  
359 *al.* 2014). This NO could have a role in induction of nitrate transporter genes. Hence,  
360 we checked NO production in WT, *nia1,2* mutants and WT seedlings grown on NO  
361 scavenger cPTIO inoculated with *Trichoderma*. Control roots in 0.1 and 3 mM NO<sub>3</sub><sup>-</sup>  
362 produced reduced levels of NO. Within 2 min of *T203* application, WT plants showed  
363 much increased levels of NO in both 0.1 and 3 mM nitrate (Fig. 7) but the increase  
364 was slightly higher in 0.1 mM than 3 mM. But, in 10 minutes and 24 h of *T203*  
365 incubation, the WT plants showed extremely low fluorescence (Fig. 7). This suggests  
366 *T203* greatly induces NO in low NO<sub>3</sub><sup>-</sup> grown plants within short time. Thus,  
367 *Trichoderma* induced NO probably plays a role in priming and induction of HATs.  
368 Assessment of NO in *nia1,2* mutant revealed that NR is responsible for NO  
369 production. cPTIO grown plants showed reduced levels of NO.

370 Then, we further checked the importance of *Trichoderma* elicited early stages  
371 of NO in the induction of HATs, total protein levels and expression of *PR1* gene in  
372 low NO producing non-symbiotic hemoglobin over-expressing line (*nsHb*<sup>+</sup>), *nia1,2*  
373 and *nrt2.1* mutants. Expression of *NRT2.1* and *2.2* levels have increased in WT in  
374 response to *Trichoderma*, whereas in *Hb*<sup>+</sup>, *nia1,2* and *nrt2.1* mutants these two  
375 HATs were not induced (Fig. 8a,b) suggesting that *Trichoderma* elicited NO is  
376 responsible for induction of HATs. Further, reduced protein levels were observed in  
377 *nia1,2* and *Hb*<sup>+</sup> plants suggesting that induction of nitrate transporters mediated by  
378 *Trichoderma* elicited NO plays a role in increased N uptake under low NO<sub>3</sub><sup>-</sup> (Fig. 8c).  
379 Further, we found that *nia1,2* and *Hb*<sup>+</sup> were unable to induce *PR1* expression under  
380 these conditions (Fig. 8d). Taken together, these results suggests that *Trichoderma*  
381 elicited NO plays a role in overall increase in defense response under low NO<sub>3</sub><sup>-</sup>.

382 Further, we investigated the role of NO in LAR and SAR development in the  
383 presence of *Trichoderma* using NO mutants. Under low NO<sub>3</sub><sup>-</sup>, WT plants performed  
384 better LAR response than *Hb*<sup>+</sup> and *nia1,2* mutant. Reduced bacterial growth and  
385 increased *PR1* gene expression was observed in WT than *Hb*<sup>+</sup> and *nia1,2* mutant  
386 (Fig. 9a,b,c). Similarly, SAR response was also compromised in than *Hb*<sup>+</sup> and *nia1,2*  
387 like LAR, a similar reduced bacterial number and increased *PR1* gene expression  
388 was observed in WT in comparison to *Hb*<sup>+</sup> and *nia1,2* mutant (Fig. 9d,e,f).

389

## 390 **ROS is a component of *Trichoderma* induced increased resistance via SAR**

391 Both NO and ROS are involved in plant resistance response hence, we  
392 investigated the role of ROS. The distal un-inoculated leaves of 0.1 mM  $\text{NO}_3^-$  WT+T  
393 plants showed increased  $\text{H}_2\text{O}_2$  production as concentrated patches in comparison to  
394 0.1 mM un-inoculated plants (Fig. **10a**-upper panel). Also, the level of  $\text{H}_2\text{O}_2$  was  
395 intense and distributed in 3 mM un-inoculated leaves of WT+T plants in comparison  
396 to untreated plants (Fig. **10a**-lower panel). This is probably due to suppression of  
397 catalase activity by SA. This suggests that *T203* inoculation can enhance  $\text{H}_2\text{O}_2$   
398 pattern in *Pst* uninoculated leaves during SAR, whereas, both the 3 mM *Pst*  
399 inoculated leaves from WT and WT+*T203* plants showed higher  $\text{H}_2\text{O}_2$  production in  
400 the infiltrated area which is visible as a dark brown patch at 24 and 48 hpc (Fig. **10a**-  
401 lower panel). This clearly suggests that *T203* plays a role in inducing  $\text{H}_2\text{O}_2$  in low  
402  $\text{NO}_3^-$  fed WT plants during SAR.

403  $\text{O}_2^-$  is a key player in cell death (Fig. **10b**). It was observed that, there was  
404 increased  $\text{O}_2^-$  in inoculated leaves of both 0.1 and 3 mM fed WT and *T203* treated  
405 WT plants, but increase was much higher in *T203* treated WT plants than  
406 *Trichoderma* untreated plants (compare Fig. **10a**-lower left and **10b**-right panel).  
407 This suggests that there was a rapid oxidative burst (HR) which offers resistance to  
408 the plants in response to *T203* treatment. Taken together, the coordinated interplay  
409 of  $\text{H}_2\text{O}_2$ ,  $\text{O}_2^-$  and NO leads to the HR associated cell death that generously  
410 improvises the LAR and SAR responses in low N-stress plants.

411

## 412 ***Trichoderma* induces defense genes during SAR in low N-fed plants**

413 Next, we checked the expression profiles of defense related genes (*PAL1*,  
414 *PR1*, *PR2* and *PR5*) during SAR. In both 3 mM and 0.1 mM *Pst* inoculated WT  
415 plants, *PAL1* transcripts were highly induced in all time points, but, the uninoculated  
416 leaves showed *PAL1* induction only till 6 hpc, but drastically declined at later time  
417 points (Fig. **11a-I**). *Trichoderma* grown WT plants under 3 mM and 0.1 mM, showed  
418 even more enhanced levels of *PAL1* transcripts (Fig. **11a-II**) in inoculated as well as  
419 uninoculated leaves till 48 hpc. Similar trend was observed in *PR1* (Fig. **11b**), *PR2*  
420 (Fig. **11c**) and *PR5* (Fig. **11d**) expression profiles, which got elevated after  
421 *Trichoderma* application. Out of all the four defense genes examined, *PR1* gene (SA

422 marker) displayed the extremely higher expression levels in *Trichoderma* grown  
423 plants suggesting that *T203* might induce SA levels to a greater extent during SAR.

#### 424 ***Trichoderma* enhances expression of SAR mediated regulatory genes**

425 Further, we checked whether *Trichoderma* can induce SAR response via  
426 induction of regulatory genes such as *DIR1*, *NPR1*, *SARD1* and *TGA3*. The lipid  
427 transfer protein, DEFECTIVE IN INDUCED RESISTANCE1 (*DIR1*) is a key mobile  
428 component of SAR response (Maldonado *et al.* 2002) involved in long-distance  
429 translocation from local to distant leaves (Carella *et al.* 2015, Champigny *et al.*  
430 2013). It was found that, *DIR1* induction took place only in the initial time points in  
431 both 0.1 and 3 mM inoculated and uninoculated WT plants (Fig. **12a-I**). But, in *T203*  
432 grown plants, a slight increased *DIR1* expression was observed in all time points  
433 (Fig. **12a-II**). Upon perception of SAR mobile signals, Non-Expresser of  
434 Pathogenesis-Related Genes1 (*NPR1*) activates defense in challenged plants (Cao  
435 *et al.* 1997). We found a similar trend in the *NPR1* expression profile like *DIR1* in WT  
436 plants (Fig. **12b-I**). Moreover, upon the *Trichoderma* treatment, the levels of *NPR1*  
437 gradually increased in both 0.1 and 3 mM inoculated and uninoculated challenged  
438 leaves (Fig. **12b-II**).

439 Next, we checked the expression of SAR DEFICIENT 1 (*SARD1*) a pathogen-  
440 induced transcription factor (Zhang *et al.* 2010) and a key regulator for Isochorismate  
441 Synthase 1 (*ICS1*) and SA synthesis (Wang *et al.* 2011). A remarkably stronger  
442 induction of *SARD1* expression levels in *T203* treated 0.1 mM uninoculated leaves at  
443 6 hpc (~82 fold) revealed that *Trichoderma* is a potential inducer of SA biosynthesis  
444 (Fig. **12c-II**). Another important regulatory gene, *TGA3*, is an *NPR1*-interacting  
445 protein (NIPs) and is a critical component in the SA signaling mechanism. This gene  
446 was induced in all treatments in response to *T203* (Fig. **12d**) suggesting that  
447 *Trichoderma* might act as unequivocal channel in SA signaling pathways.

#### 448 ***nrt2.1* and *npr1* mutants are compromised in LAR and SAR**

449 Further, we checked LAR in *nrt2.1* and *npr1* in response to virulent  
450 *Pst*DC3000. The 0.1 mM N-fed *nrt2.1* and *npr1* mutants developed more severe  
451 symptoms than 0.1 mM WT plants (Fig. **13a**- 0.1 mM panel). Whereas the 3 mM  
452 NO<sub>3</sub><sup>-</sup>-fed WT plants showed less disease symptoms as compared to 0.1 mM NO<sub>3</sub><sup>-</sup>



453 plants (Compare Fig. **1a** and Fig. **13a**- 3 mM panel). A continuous increase in CFU  
454 count was observed in 0.1 mM grown WT, *nrt2.1* and *npr1* at 24 and 48 hpi in  
455 comparison to bacterial numbers in 3 mM NO<sub>3</sub><sup>-</sup> grown plants (Fig. **13b**). This  
456 suggests that optimum N concentration plays an important role in resistance  
457 response towards virulent *Pst* DC3000.

458 Similarly, we studied the SAR response in the WT, *nrt2.1* and *npr1* plants. 0.1  
459 mM *Pst*-challenged WT plants show more prominent necrotic and discolored lesions  
460 spread to half of the leaf (Fig. **2a**) confirming susceptible symptoms (yellow specks).  
461 On the other hand, the mutant's *nrt2.1* and *npr1* showed even more severe disease  
462 symptoms (extensive chlorosis and necrosis) (Fig. **13c**) under low NO<sub>3</sub><sup>-</sup> conditions.  
463 Results suggests that, 3 mM NO<sub>3</sub><sup>-</sup> plants defended better during secondary  
464 challenge than 0.1 mM NO<sub>3</sub><sup>-</sup> plants. Bacterial populations were also increased in  
465 *nrt2.1* and *npr1* mutants (Fig. **13d**) suggesting that *NRT2.1* and *NPR1* plays an  
466 important role in increasing defense mediated by *Trichoderma*.

#### 467 **Salicylic acid pathway is a part of enhanced plant resistance mediated by** 468 ***Trichoderma* under low N**

469 Examination of SA levels revealed that *Trichoderma* presence accelerated  
470 total SA levels in 0.1 mM uninoculated distal leaves, in comparison to 3 mM  
471 uninoculated leaves. There was no significant increase in SA levels observed in  
472 inoculated leaves of 0.1 mM *Trichoderma* grown plants, while in 3 mM *Trichoderma*  
473 grown plants, a significant increase in SA levels were observed (Fig. **14a**). We  
474 sought to further confirm role of SA in *Trichoderma* increased SAR, hence *nahG*  
475 plants were challenged in the presence or absence of *Trichoderma*. An intense  
476 chlorotic lesion was evident in both 0.1 and 3 mM grown *nahG* plants in response to  
477 challenge inoculation while *Trichoderma* grown *nahG* plants when challenged they  
478 defended much better evidenced by decreased chlorotic lesions and reduced  
479 bacterial numbers (Fig. **14b,c**). Surprisingly, *Trichoderma* grown *nahG* plants  
480 showed slightly enhanced *PR1* transcript levels (Fig. **14d**).

#### 481 **Discussion**

482 Nitrogen availability and supply can severely impact growth and development  
483 of plants (Walker *et al.* 2001; Landrein *et al.* 2018). N deficiency can cause chlorosis,



484 which can impact photosynthesis and overall energy demand for growth and  
485 defense. Since N is also important for synthesis of various secondary metabolites,  
486 severe depletion of N can impact defense related pathways. Hence, plants may not  
487 be able to activate defense pathways for tolerance or resistance (Shoeijers *et al.*  
488 2000). Plant take up N in the form of  $\text{NH}_4^+$  or  $\text{NO}_3^-$  or combination of both. Different N  
489 forms differentially effect various free radicals such as NO and ROS (Wany *et al.*  
490 2018; Gupta *et al.* 2013). Ammonium uptake and assimilation is less costly to the  
491 plants in comparison to  $\text{NO}_3^-$  but excess of  $\text{NH}_4^+$  can cause toxic effects to the plants  
492 (Boudsocq *et al.* 2012; Liu *et al.* 2017), hence, many plants use  $\text{NO}_3^-$  as the  
493 preferable N source. Moreover,  $\text{NO}_3^-$  can help in better charge balance (Boudsocq *et al.*  
494 *et al.* 2012). Nitrate nutrition can also enhance plant defence via increased generation  
495 of NO, polyamines and SA (Gupta *et al.* 2013; Fagard *et al.* 2014). Hence, we  
496 preferred to check the plant defense response under  $\text{NO}_3^-$  nutrition rather than under  
497  $\text{NH}_4^+$ .

498         Plants which are grown under 0.1 mM  $\text{NO}_3^-$  showed reduced growth (Fig. **S1**)  
499 and morphological parameters (Fig. **S2**), suggesting that supplied 0.1 mM  $\text{NO}_3^-$  is not  
500 sufficient for the plants for growth and under these conditions plants become more  
501 susceptible. In our experiments, 0.1 mM  $\text{NO}_3^-$  grown plants were compromised in  
502 both LAR and SAR (Fig. **1,2**) response, suggesting that N is required for better  
503 defense. Plants grown on low N produced less SA (Fig. **14a**), further supporting that  
504 N is needed for SA biosynthesis. Since plants need N for growth and disease  
505 resistance, increasing N use efficiency can help them to defend better. Some group  
506 of *Trichoderma* help in nutrient absorption leading to increased growth and  
507 enhanced plant defense (Brotman *et al.* 2010). Previously, it was shown that the  
508 supplementation of *Trichoderma asperelloides* enhances plant growth (Brotman *et al.*  
509 *et al.* 2012), and protects against abiotic and biotic stressors, moreover, it induces  
510 systemic resistance responses (Contreras-Cornejo *et al.* 2016; Brotman *et al.* 2012).  
511 *Trichoderma* induced increased growth attributed to auxin and ethylene (Garnica-  
512 Vergara *et al.* 2016) and induction of genes involved in carbon and N metabolism  
513 (Domínguez *et al.* 2016). However, there are hardly any reports on investigating the  
514 mechanism of improved plant growth and defense under N starvation mediated by  
515 *Trichoderma*. In this study, we unraveled the mechanism of *Trichoderma* induced  
516 plant growth and defense under low N. Hence, in this current work, we studied the

517 impact of *Trichoderma* on enhancing N uptake and support in LAR & SAR response  
518 under low NO<sub>3</sub><sup>-</sup> stress.

519 The low NO<sub>3</sub><sup>-</sup> fed plants which were grown in the presence of *Trichoderma*,  
520 showed increased growth (Fig. **S2**) suggesting that *Trichoderma* can enhance  
521 growth under low NO<sub>3</sub><sup>-</sup> (Fig. **S1a**). We found that this enhanced growth is partly due  
522 to increase N uptake which was evidenced by increased expression of *NRT2.1*,  
523 *NRT2.2*, *NRT 2.4* HATs (Fig. **6a,b,c,d,e,f**) and increased protein levels (Fig. **6i**).  
524 Since low NO<sub>3</sub><sup>-</sup> fed plants becomes susceptible (Snoeijers *et al.* 2000), it is logical to  
525 assume that *Trichoderma* can increase N uptake and enhance resistance. Hence, in  
526 further experiments, we focused on LAR and SAR response under low and optimum  
527 NO<sub>3</sub><sup>-</sup> in the presence or absence of *Trichoderma*. During local *Pst* infection, the  
528 plants display LAR response, and the systemic/distant uninoculated leaves induces  
529 SAR response. Both are important for plants to defend against pathogens.

530 During SAR, after primary inoculation, within 4–6 hours, in the inoculated site,  
531 where, localized cell death (HR) occurs, plant displays hyponastic response. 3 mM  
532 N-fed WT plants showed clear hyponasty after primary inoculation, whereas 0.1 mM  
533 did not display such response (Fig. **S1c**). In 3 mM WT plants, the defense response  
534 after secondary challenge was more rapid, robust and even long-lasting till 5 days  
535 post challenge (data not shown) whereas, 0.1 mM WT plants showed disease  
536 symptoms suggesting that NO<sub>3</sub><sup>-</sup> concentration plays a role in LAR and SAR  
537 development (Fig. **2a**; Fig. **S1b**).

538 In our experiments, roots were treated with *Trichoderma* hence, we examined  
539 high and low affinity transporters to see whether *Trichoderma* modulates these  
540 transporters to enhance N uptake under low nitrate. *NRT2.1* is the main HAT,  
541 localized at the plasma membrane. Previously, it was shown that these transporters  
542 becomes active during N starvation and is severely inhibited when reduced nitrate  
543 sources such as glutamine or ammonium are provided (Dechorgnat *et al.* 2012).  
544 Similarly, *NRT2* also induced under low N (Dechorgnat *et al.* (2012). In response to  
545 *Trichoderma* treatment, a rapid re-programmed *NRT2.1*, *NRT2.2* transcripts in both  
546 0.1 and 3 mM was observed during *Pst* inoculation. This feature is very important  
547 since plants are NO<sub>3</sub><sup>-</sup> starved. *NRT2.1* involvement was further evidenced by the fact  
548 that *nrt2.1* mutant produced less protein under low N and *Trichoderma* was unable to

549 increase protein content in this mutant (Fig. **6f**). This mutant become very much  
550 susceptible to LAR and SAR (Fig. **13**).

551 We further unraveled the mechanism behind increased expression of LATs  
552 and HATs mediated by *Trichoderma*. One of the features of *Trichoderma* is the  
553 induction of short-term NO and ROS. These molecules play important role in  
554 induction of plant defense responses (Gupta *et al.* 2014). We suspected the role of  
555 NO in activating genes of these transporters. *Trichoderma* induced expression of  
556 *NRTs* are most likely mediated by short term increase in NO upon *Trichoderma*  
557 inoculation. The NR dependent NO elicited by *Trichoderma* probably responsible for  
558 the increased expression of HATs as our experiments revealed that in *nia1,2* and  
559 Hb<sup>+</sup>, despite of growing in the presence of *Trichoderma* were unable to induce HATs  
560 they showed decline in protein levels (Fig. **8c**). *Trichoderma* triggers SA dependent  
561 SAR pathway (Pieterse *et al.* 2014). *Trichoderma* spp. induced ROS is involved in  
562 plant's resistance response against many biotic stressors (Asmawati *et al.* 2017). It  
563 also plays an important role in hypersensitive cell death together with NO (Durner  
564 and Klessig 1999, Dorey *et al.* 1999). Among ROS, H<sub>2</sub>O<sub>2</sub> is the most stable form of  
565 ROIs that play an important role as signal transducer in the plant cell death process  
566 (Pieterse *et al.* 2014), and acts as key modulators of NO in triggering cell death. As  
567 shown in Fig. **10a**, it is observed that, *T203* treated low N fed plants displayed  
568 increased H<sub>2</sub>O<sub>2</sub> levels (Fig. **S4a,b**), thus, enabling the SAR initiation and the  
569 establishment stage. Superoxides (O<sub>2</sub><sup>-</sup>) are mainly produced via mitochondrial  
570 electron transport and *NADPH oxidase* chain during stress. Pathogens usually  
571 employ this mitochondrial disturbance as a strategy to suppress host immunity and  
572 thus, increased ROS may contribute some resistance to plants against pathogens  
573 (Torres *et al.* 2002, 2005). Earlier, it was shown that the extracellular elicitors  
574 isolated from *Trichoderma viridae* also induces the O<sub>2</sub><sup>-</sup> levels (Calderon *et al.* 1994).  
575 Here, we also found that *T203* grown, 0.1 mM NO<sub>3</sub><sup>-</sup>, *Pst* inoculated plants show  
576 higher O<sub>2</sub><sup>-</sup> levels than untreated ones (Fig. **10b**, Fig. **S4c**), suggesting that  
577 *Trichoderma* can enhance O<sub>2</sub><sup>-</sup> production during infection which can aid in defense.

578 Consequently, the expression of defense marker genes such as *PR1*, *PR2*,  
579 *PR5* and *PAL1* (Fig. **11**) were also highly induced in the presence of *Trichoderma* in  
580 low N-fed plants suggesting that *Trichoderma* mediated ROS, NO along with  
581 increased N probably responsible for higher induction of these genes. Martinez-

582 Medina *et al.* (2013), reported several *Trichoderma* strains are known to induce  
583 systemic responses by acting as a "short circuit" in plant defense signaling. *PAL1* is  
584 an important marker gene in SA mediated defense (Kim and Hwang 2014) and  
585 accumulates in cells undergoing HR (Dorey *et al.* 1997) and to be essential for local  
586 and systemic resistance (Delaney *et al.* 1994). *PAL1* levels were increased by  
587 *Trichoderma* is very intriguing. SAR response is associated with a specific set of  
588 SAR genes encoding pathogenesis related (PR) proteins (Pieterse *et al.* 1996). *PR*  
589 gene activates and accumulates during SAR (Fig. **11b,c,d**) which correlated with  
590 findings of Brotman *et al.* (2012) and Pieterse *et al.* (1996).

591 In our study, SAR regulatory genes *DIR1*, *NPR1* and *TGA3* are induced in the  
592 presence of *Trichoderma* under low N stress. The *npr1* mutant compromised in LAR  
593 and SAR in the presence of *Trichoderma* suggesting the role of this gene in  
594 enhancing defense. In *nahG* mutant, defense responses are slightly enhanced in the  
595 presence of *Trichoderma* despite of reduced SA levels, suggesting that apart from  
596 SA other factors such as increased NO, ROS probably responsible for defense in  
597 this mutant. Overall, this study proved that optimum N is required for LAR and SAR.  
598 *Trichoderma* can enhance N uptake via modulating N transporters via eliciting short  
599 term NO under low nitrate nutrition. The enhanced N uptake plays a role in  
600 enhancing SA levels and defense gene expression in local and distal levels to  
601 increase overall plant defense (Fig **15a,b**). These defense responses are not  
602 activated in *npr1*, *nahG*, *nrt2.1*, *Hb<sup>+</sup>* and *nia1,2* mutant providing strong evidence that  
603 *Trichoderma* mediated enhanced resistance under low nitrate involves synergistic  
604 roles of NO, ROS and SA.

## 605 **Acknowledgements**

606 We thank Dr. Yariv Brotman for providing the *T203* strain. Seeds of *nahG* and  
607 *npr1* mutants were provided by Prof. Ashis Nandi, JNU. Seeds of *nsHb<sup>+</sup>* was  
608 provided by Dr. Kim Hebelstrup. This research was funded by SERB, DST (NPDF to  
609 AW), UGC (SRF to PKP) and SERB-ECR and DBT-IYBA award to KJG. CIF of  
610 NIPGR is greatly acknowledged.

## 611 **Author contribution**

612 KJG supervised, designed the project and wrote the manuscript. AW designed,  
613 performed experiments and analysed whole data. PKP involved in SAR experiments  
614 and assisted in manuscript writing.

615 **References:**

616 **Alvarez ME, Pennell RI, Meijer PJ, Ishikawa A, Dixon RA, Lamb C. 1998.**  
617 Reactive oxygen intermediates mediate a systemic signal network in the  
618 establishment of plant immunity. *Cell* **92**: 773-784.

619 **Alves M, Dadalto S, Gonçalves A, de Souza G, Barros V, Fietto L. 2014.**  
620 Transcription factor functional protein-protein interactions in plant defense  
621 responses. *Proteomes* **2**: 85-106.

622 **Asmawati L, Widiastuti A, Sumardiyono C. 2017.** Induction of Reactive Oxygen  
623 Species by *Trichoderma* spp. Against Downy Mildew in Maize. In *Proceeding of the*  
624 *1st International Conference on Tropical Agriculture*. Springer, Cham :139-146.

625 **Boudsocq S, Niboyet A, Lata JC, Raynaud X, Loeuille N, Mathieu J, Blouin M,**  
626 **Abbadie L, Barot S. 2012.** Plant preference for ammonium versus nitrate: a  
627 neglected determinant of ecosystem functioning? *The American Naturalist* **180**: 60-  
628 69.

629 **Brotman Y, Lisec J, Méret M, Chet I, Willmitzer L, Viterbo A. 2012.** Transcript  
630 and metabolite analysis of the *Trichoderma*-induced systemic resistance response to  
631 *Pseudomonas syringae* in *Arabidopsis thaliana*. *Microbiology* **158**: 139-146.

632 **Brotman Y, Gupta KJ, Viterbo A. (2010)** *Trichoderma*: Quick Guide. *Current*  
633 *Biology* **20**: 390-391.

634 **Calderon AA, Zapata JM, Barcelo AR. 1994.** Peroxidase-mediated formation of  
635 resveratrol oxidation products during the hypersensitive-like reaction of grapevine  
636 cells to an elicitor from *Trichoderma viride*. *Physiological and Molecular Plant*  
637 *Pathology* **44**: 289-299.

638 **Cameron RK, Dixon RA, Lamb CJ. 1994.** Biologically induced systemic acquired  
639 resistance in *Arabidopsis thaliana*. *The Plant Journal* **5**: 715-725.

- 640 **Cameron RK, Paiva NL, Lamb CJ, Dixon RA. 1999.** Accumulation of salicylic acid  
641 and *PR-1* gene transcripts in relation to the systemic acquired resistance (SAR)  
642 response induced by *Pseudomonas syringae* pv. tomato in  
643 *Arabidopsis*. *Physiological and Molecular Plant Pathology* **55**: 121-130.
- 644 **Cao H, Glazebrook J, Clarke JD, Volko S, Dong X. 1997.** The *Arabidopsis* NPR1  
645 gene that controls systemic acquired resistance encodes a novel protein containing  
646 ankyrin repeats. *Cell* **88**: 57-63.
- 647 **Carella P, Isaacs M, Cameron RK. 2015.** Plasmodesmata-located protein  
648 overexpression negatively impacts the manifestation of systemic acquired resistance  
649 and the long-distance movement of Defective in Induced Resistance1 in *A*  
650 *rabidopsis*. *Plant Biology* **17**: 395-401.
- 651 **Champigny MJ, Isaacs M, Carella P, Faubert J, Fobert PR, Cameron RK. 2013.**  
652 Long distance movement of *DIR1* and investigation of the role of DIR1-like during  
653 systemic acquired resistance in *Arabidopsis*. *Frontiers in Plant Science* **4**: 230.
- 654 **Contreras-Cornejo HA, Macías-Rodríguez L, del-Val E, Larsen J. 2016.**  
655 Ecological functions of *Trichoderma* spp. and their secondary metabolites in the  
656 rhizosphere: interactions with plants. *FEMS microbiology ecology* **92**: fiw036.
- 657 **Daudi A, O'Brien JA. 2012.** Detection of hydrogen peroxide by DAB staining in  
658 *Arabidopsis* leaves. *Bio-Protocol* **2**: 1-4.
- 659 **Dechorgnat J, Patrit O, Krapp A, Fagard M, Daniel-Vedele F. 2012.**  
660 Characterization of the Nrt2. 6 gene in *Arabidopsis thaliana*: a link with plant  
661 response to biotic and abiotic stress. *PloS one* **7**: e42491.
- 662 **Delaney TP, Uknes S, Vernooij B, Friedrich L, Weymann K, Negrotto D, Gaffney**  
663 **T, Gut-Rella M, Kessmann H, Ward E, Ryals J. 1994.** A central role of salicylic acid  
664 in plant disease resistance. *Science* **266**: 1247-1250.
- 665 **Delledonne M, Xia Y, Dixon R A, Lamb C. 1998.** Nitric oxide functions as a signal  
666 in plant disease resistance. *Nature* **394**: 585.
- 667 **Domínguez S, Rubio MB, Cardoza RE, Gutiérrez S, Nicolás C, Bettioli W,**  
668 **Hermosa R, Monte E. 2016.** Nitrogen metabolism and growth enhancement in



669 tomato plants challenged with *Trichoderma harzianum* expressing the *Aspergillus*  
670 *nidulans* acetamidase *amdS* gene. *Frontiers in Microbiology* **7**: 1182.

671 **Dorey S, Baillieul F, Pierrel MA, Saindrenan P, Fritig B, Kauffmann S. 1997.**  
672 Spatial and temporal induction of cell death, defense genes, and accumulation of  
673 salicylic acid in tobacco leaves reacting hypersensitively to a fungal glycoprotein  
674 elicitor. *Molecular Plant-Microbe Interactions* **10**: 646–655.

675 **Dorey S, Kopp M, Geoffroy P, Fritig B, Kauffmann S. 1999.** Hydrogen peroxide  
676 from the oxidative burst is neither necessary nor sufficient for hypersensitive cell  
677 death induction, phenylalanine ammonia lyase stimulation, salicylic acid  
678 accumulation, or scopoletin consumption in cultured tobacco cells treated with  
679 elicitor. *Plant Physiology* **121**: 163-172.

680 **Durner J, Klessig DF. 1999.** Nitric oxide as a signal in plants. *Current Opinion in*  
681 *Plant Biology* **2**: 369-374.

682 **Fagard M, Launay A, Clément G, Courtial J, Dellagi A, Farjad M, Krapp A,**  
683 **Soulié MC, Masclaux-Daubresse C. 2014.** Nitrogen metabolism meets  
684 phytopathology. *Journal of Experimental Botany* **65**: 5643-5656.

685 **Fernández-Bautista N, Domínguez-Núñez JA, Moreno MC, Berrocal-Lobo M.**  
686 **2002.** Plant tissue trypan blue staining during phytopathogen infection. *Bio-*  
687 *Protocol* **6**: e2078.

688 **Frungillo L, de Oliveira JFP, Saviani EE, Oliveira HC, Martínez MC, Salgado I.**  
689 **2013.** Modulation of mitochondrial activity by *S-nitrosoglutathione reductase* in  
690 *Arabidopsis thaliana* transgenic cell lines. *Biochimica et Biophysica Acta -*  
691 *Bioenergetics* **1827**: 239-247.

692 **Garnica-Vergara A, Barrera-Ortiz S, Muñoz-Parra E, Raya-González J,**  
693 **Méndez-Bravo A, Macías-Rodríguez L, Ruiz-Herrera LF, López-Bucio J. 2016.**  
694 The volatile 6-pentyl-2H-pyran-2-one from *Trichoderma atroviride* regulates  
695 *Arabidopsis thaliana* root morphogenesis via auxin signaling and ETHYLENE  
696 INSENSITIVE 2 functioning. *New Phytologist* **209**: 1496-1512.



- 697 **Gupta A, Dixit SK, Senthil-Kumar M. 2016.** Drought stress predominantly endures  
698 *Arabidopsis thaliana* to *Pseudomonas syringae* infection. *Frontiers in Plant*  
699 *Science* **7**: 808.
- 700 **Gupta KJ, Mur LA, Brotman Y. 2014.** *Trichoderma asperelloides* suppresses nitric  
701 oxide generation elicited by *Fusarium oxysporum* in *Arabidopsis* roots. *Molecular*  
702 *Plant-Microbe Interactions* **27**: 307-314.
- 703 **Gupta KJ, Brotman Y, Segu S, Zeier T, Zeier J, Persijn ST, Cristescu SM,**  
704 **Harren FJM, Bauwe H, Fernie AR. 2013.** The form of nitrogen nutrition affects  
705 resistance against *Pseudomonas syringae* pv. *phaseolicola* in tobacco. *Journal of*  
706 *Experimental Botany* **64**: 553-568.
- 707 **Hoagland DR, Arnon DI 1950.** The water culture method for growing plant without  
708 soil. California Agricultural Experiment Station *University of California Berkley Press,*  
709 *CA. 347*: 32.
- 710 **Jambunathan N. 2010.** Determination and detection of reactive oxygen species  
711 (ROS), lipid peroxidation, and electrolyte leakage in plants. *Methods in Molecular*  
712 *Biology* **639**: 292–298.
- 713 **Jones JD, Dangl JL. 2006.** The plant immune system. *Nature* **444**: 323.
- 714 **Kim DS, Hwang BK. 2014.** An important role of the pepper phenylalanine ammonia-  
715 lyase gene (PAL1) in salicylic acid-dependent signalling of the defence response to  
716 microbial pathogens. *Journal of Experimental Botany* **65**: 2295-2306.
- 717 **Krapp A, David LC, Chardin C, Girin T, Marmagne A, Leprince AS, Chaillou S,**  
718 **Ferrario-Méry S, Meyer C, Daniel-Vedele F. 2014.** Nitrate transport and signalling  
719 in *Arabidopsis*. *Journal of Experimental Botany* **65**: 789-798.
- 720 **Lamb C, Dixon RA. 1997.** The oxidative burst in plant disease resistance. *Annual*  
721 *Review of Plant Biology* **48**: 251-275.
- 722 **Landrein B, Formosa-Jordan P, Malivert A, Schuster C, Melnyk CW, Yang W,**  
723 **Turnbull C, Meyerowitz EM, Locke JC, Jönsson H. 2018.** Nitrate modulates stem  
724 cell dynamics in *Arabidopsis* shoot meristems through cytokinins. *Proceedings of the*  
725 *National Academy of Sciences* **115**: 1382-1387.

- 726 **Li H, Hu B, Chu C. 2017.** Nitrogen use efficiency in crops: lessons from Arabidopsis  
727 and rice. *Journal of Experimental Botany* **68**: 2477-2488.
- 728 **Liu Y, von Wirén N. 2017.** Ammonium as a signal for physiological and  
729 morphological responses in plants. *Journal of Experimental Botany* **68**: 2581-2592.
- 730 **Maldonado AM, Doerner P, Dixon RA, Lamb CJ, Cameron RK. 2002.** A putative  
731 lipid transfer protein involved in systemic resistance signalling in  
732 Arabidopsis. *Nature* **419**: 399.
- 733 **Martínez-Medina A, Fernández I, Sánchez-Guzmán MJ, Jung SC, Pascual JA,**  
734 **Pozo MJ. 2013.** Deciphering the hormonal signalling network behind the systemic  
735 resistance induced by *Trichoderma harzianum* in tomato. *Frontiers in Plant*  
736 *Science* **4**: 206.
- 737 **Métraux JP, Signer H, Ryals J, Ward E, Wyss-Benz M, Gaudin J, Raschdorf K,**  
738 **Schmid E, Blum W, Inverardi B. 1990.** Increase in salicylic acid at the onset of  
739 systemic acquired resistance in cucumber. *Science* **250**: 1004-1006.
- 740 **Mur LA, Brown IR, Darby RM, Bestwick CS, Bi YM, Mansfield JW, Draper J.**  
741 **2000.** A loss of resistance to avirulent bacterial pathogens in tobacco is associated  
742 with the attenuation of a salicylic acid-potentiated oxidative burst. *The Plant*  
743 *Journal* **23**: 609-621.
- 744 **Mur LA, Kenton P, Lloyd AJ, Ougham H, Prats E. 2008.** The hypersensitive  
745 response; the centenary is upon us but how much do we know?. *Journal of*  
746 *Experimental Botany* **59**: 501-520.
- 747 **Mur LA, Simpson C, Kumari A, Gupta AK, Gupta KJ. 2017.** Moving nitrogen to  
748 the centre of plant defence against pathogens. *Annals of botany* **119**: 703-709.
- 749 **O'Brien JA, Vega A, Bouguyon E, Krouk G, Gojon A, Coruzzi G, Gutiérrez RA.**  
750 **2016.** Nitrate transport, sensing, and responses in plants. *Molecular Plant* **9**: 837-  
751 856.
- 752 **Oliva R, Quibod IL. 2017.** Immunity and starvation: new opportunities to elevate  
753 disease resistance in crops. *Current Opinion in Plant Biology* **38**: 84-91.

- 754 **Park SW, Kaimoyo E, Kumar D, Mosher S, Klessig DF. 2007.** Methyl salicylate is  
755 a critical mobile signal for plant systemic acquired resistance. *Science* **318**: 113-116.
- 756 **Pieterse CM, Van Wees SC, Hoffland E, Van Pelt JA, Van Loon LC. 1996.**  
757 Systemic resistance in Arabidopsis induced by biocontrol bacteria is independent of  
758 salicylic acid accumulation and pathogenesis-related gene expression. *The Plant*  
759 *Cell* **8**: 1225-1237.
- 760 **Pieterse CM, Zamioudis C, Berendsen RL, Weller DM, Van Wees SC, Bakker**  
761 **PA. 2014.** Induced systemic resistance by beneficial microbes. *Annual Review of*  
762 *Phytopathology* **52**: 347-375
- 763 **Ryals JA, Neuenschwander UH, Willits MG, Molina A, Steiner HY, Hunt MD.**  
764 **1996.** Systemic acquired resistance. *The Plant Cell* **8**: 1809.
- 765 **Shoresh M, Harman GE, Mastouri F. 2010.** Induced systemic resistance and plant  
766 responses to fungal biocontrol agents. *Annual Review of Phytopathology* **48**: 21-43.
- 767 **Shoresh M, Yedidia I, Chet I. 2005.** Involvement of jasmonic acid/ethylene signaling  
768 pathway in the systemic resistance induced in cucumber by *Trichoderma asperellum*  
769 *T203*. *Phytopathology* **95**: 76-84.
- 770 **Singh V, Roy S, Giri MK, Chaturvedi R, Chowdhury Z, Shah J, Nandi AK. 2013.**  
771 Arabidopsis thaliana FLOWERING LOCUS D is required for systemic acquired  
772 resistance. *Molecular Plant-Microbe Interactions* **26**: 1079-1088.
- 773 **Snoeijers SS, Pérez-García A, Joosten MH, De Wit PJ. 2000.** The effect of  
774 nitrogen on disease development and gene expression in bacterial and fungal plant  
775 pathogens. *European Journal of Plant Pathology* **106**: 493-506.
- 776 **Torres MA, Dangl JL, Jones JD. 2002.** Arabidopsis gp91phox homologues  
777 AtrbohD and AtrbohF are required for accumulation of reactive oxygen intermediates  
778 in the plant defense response. *Proceedings of the National Academy of Sciences of*  
779 *the United States of America* **99**: 517–522.
- 780 **Torres MA, Jones JD, Dangl JL. 2005.** Pathogen-induced, NADPH oxidase-derived  
781 reactive oxygen intermediates suppress spread of cell death in Arabidopsis thaliana.  
782 *Nature Genetics* **37**: 1130–1134.

783 **Tsay YF, Chiu CC, Tsai CB, Ho CH, Hsu PK. 2007.** Nitrate transporters and  
784 peptide transporters. *FEBS letters* **581**: 2290-2300.

785 **Walker RL, Burns IG, Moorby J. 2001.** Responses of plant growth rate to nitrogen  
786 supply: a comparison of relative addition and N interruption treatments. *Journal of*  
787 *Experimental Botany* **52**: 309-317.

788 **Wang L, Tsuda K, Truman W, Sato M, Nguyen LV, Katagiri F, Glazebrook J.**  
789 **2011.** CBP60g and SARD1 play partially redundant critical roles in salicylic acid  
790 signaling. *The Plant Journal* **67**: 1029-1041.

791 **Wany A, Gupta AK, Kumari, Mishra S, Singh N, Pandey S, Vanvari R,**  
792 **Igamberdiev AU, Fernie AR, Gupta KJ. 2018.** Nitrate nutrition influences multiple  
793 factors in order to increase energy efficiency under hypoxia in Arabidopsis. *Annals of*  
794 *Botany*.doi.org/10.1093/aob/mcy202.

795 **Wany A, Kumari A, Gupta KJ. 2017.** Nitric oxide is essential for the development of  
796 aerenchyma in wheat roots under hypoxic stress. *Plant, Cell & Environment* **40**:  
797 3002-3017.

798 **Yedidia I, Shores M, Kerem Z, Benhamou N, Kapulnik Y, Chet I. 2003.**  
799 Concomitant induction of systemic resistance to *Pseudomonas syringae* pv.  
800 *lachrymans* in cucumber by *Trichoderma asperellum* (T-203) and accumulation of  
801 phytoalexins. *Applied and Environmental Microbiology* **69**: 7343-7353.

802 **Zhang Y, Xu S, Ding P, Wang D, Cheng YT, He J, Gao M, Xu F, Li Y, Zhu Z, Li X.**  
803 **2010.** Control of salicylic acid synthesis and systemic acquired resistance by two  
804 members of a plant-specific family of transcription factors. *Proceedings of the*  
805 *National Academy of Sciences USA* **107** (42) 18220-18225

## 806 **Figure legends**

807 **Fig. 1: LAR response elicited by *Pst*DC3000/*avrRpm1* is compromised in low**  
808 **nitrate grown WT plants**

809 **(a)** *Pst*DC3000-*avrRpm1* mediated HR observed in 3mM and 0.1 mM NO<sub>3</sub><sup>-</sup> grown  
810 WT plants at different time points. An early HR response observed in 3 mM *Pst*  
811 treated WT plants immediately after 4 hpi whereas 0.1 mM *Pst* treated WT plants

812 showed extensive leaf discoloration and necrotic lesions shown by red arrows at 24  
813 and 48 hpi. **(b)** Electrolyte leakage from leaf areas of 0.1 mM and 3 mM  $\text{NO}_3^-$  plants  
814 infiltrated with *Pst* and 10 mM  $\text{MgCl}_2$ . Data are mean values  $\pm$  SE. A significant  
815 difference between all treatments is analyzed by t-test at  $p < 0.001$  (\*\*\*),  $p < 0.01$  (\*\*)  
816 and  $p < 0.05$  (\*) with 3 mM  $\text{MgCl}_2$  as control. **(c)** Bacterial number in log CFU in *Pst*  
817 infiltrated leaves of 0.1 mM and 3 mM  $\text{NO}_3^-$  plants immediately after infiltration (0  
818 hpi). Data are mean values  $\pm$  SE. A significant difference between all treatments is  
819 analyzed by t-test at  $p < 0.001$  (\*\*\*),  $p < 0.01$  (\*\*) and  $p < 0.05$  (\*) with 3 mM  $\text{NO}_3^-$  as  
820 control. **(d)** Relative *PR1* transcript levels from 0.1 and 3 mM *Pst* treated leaves at  
821 different time points. Data are mean values  $\pm$  SE. Asterisks indicate statistical  
822 significance between 0.1 mM and 3 mM  $\text{NO}_3^-$  plants is analyzed by t-test at  $p < 0.001$   
823 (\*\*\*),  $p < 0.01$  (\*\*). All the results obtained are representative of three independent  
824 experiments.

825 **Fig. 2: Low nitrate grown WT plants show susceptible systemic responses**  
826 **during SAR**

827 **(a)** Lesion development post primary inoculation (first panel) and secondary  
828 challenge (second panel) in inoculated and uninoculated leaves of 0.1 mM and 3 mM  
829  $\text{NO}_3^-$  plants. A characteristic lesion pattern in inoculated leaves of both 0.1 and 3 mM  
830  $\text{NO}_3^-$  plants is noted **(b)** Histochemical staining for the detection of HR- mediated cell  
831 death post secondary challenge in inoculated and uninoculated leaves of 0.1 mM  
832 and 3 mM  $\text{NO}_3^-$  plants. Scale bar-1 mm **(c)** Electrolyte leakage observed post  
833 primary (first panel) inoculation and secondary challenge (second panel) in  
834 inoculated and uninoculated leaves of 0.1 mM and 3 mM  $\text{NO}_3^-$  plants. A significant  
835 difference between all treatments is analyzed by t-test at  $p < 0.05$  (\*) with 3 mM WT  
836  $\text{MgCl}_2$  as control **(d)** Bacterial number in log CFU observed post secondary  
837 challenge in inoculated leaves of 0.1 mM and 3 mM  $\text{NO}_3^-$  plants. A significant  
838 difference between all treatments is analyzed by t-test at  $p < 0.001$  (\*\*\*),  $p < 0.01$  (\*\*)  
839 and  $p < 0.05$  (\*)).

840 **Fig. 3: *Trichoderma* supplementation enhances LAR response in low nitrate**  
841 **grown WT plants**

842 **(a)** *Pst*DC3000-*avrRpm1* induced HR in 0.1 and 3 mM WT plants at different time  
843 points after *Trichoderma* (*T203*) supplementation. The images are representative of

844 three independent experiments. First panel shows the mock infiltrated leaves i.e.  
845 control leaves treated with 10 mM MgCl<sub>2</sub> and second panel shows *Pst* infiltrated  
846 leaves of 0.1 and 3 mM NO<sub>3</sub><sup>-</sup> concentrations **(b)** Electrolyte leakage from 0.1 mM  
847 and 3 mM WT + *T203* treated plants infiltrated with *Pst* and 10 mM MgCl<sub>2</sub>. Data are  
848 mean values ± SE. A significant difference between all treatments is analyzed by t-  
849 test at p<0.001 (\*\*\*) and p<0.01 (\*\*) with 3 mM WT-MgCl<sub>2</sub> as control **(c)** Bacterial  
850 number in terms of log CFU in *Pst* infiltrated leaves of *T203* treated 0.1 mM and 3  
851 mM NO<sub>3</sub><sup>-</sup> WT plants. Data are mean values ± SE. A significant difference between  
852 all treatments is analyzed by t-test at p<0.001 (\*\*\*), p<0.01 (\*\*) and p<0.05 (\*) **(d)**  
853 Relative *PR1* transcript levels from 0.1 and 3 mM *Pst* treated leaves of *T203* treated  
854 WT plants at different time points (hpi). Data are mean values ± SE. Asterisks  
855 indicate statistical significance between 0.1 mM and 3 mM plants is analyzed by t-  
856 test p<0.001 (\*\*\*) and p<0.01 (\*\*), by taking 3 mM plants as control.

857 **Fig. 4: *Trichoderma* enhances SAR response in low nitrate plants**

858 **(a)** HR development post primary inoculation (first panel and secondary challenge  
859 (second panel) in inoculated and uninoculated leaves of 0.1 mM and 3 mM *T203*  
860 treated WT plants. Note a characteristic lesion pattern in inoculated leaves of both  
861 0.1 and 3 mM plants **(b)** Histochemical staining for the detection of HR-mediated cell  
862 death post secondary challenge in inoculated and uninoculated leaves of 0.1 mM  
863 and 3 mM NO<sub>3</sub><sup>-</sup>, *T203* treated WT plants. Scale bar- 1 mm **(c)** Electrolyte leakage  
864 observed post primary (first panel) inoculation and secondary challenge (second  
865 panel) in inoculated and uninoculated leaves of 0.1 mM and 3 mM *T203* treated WT  
866 plants. A significant difference between all treatments is analyzed by t-test at  
867 p<0.001 (\*\*\*), p<0.01 (\*\*) and p<0.05 (\*) with 3 mM WT MgCl<sub>2</sub> as control **(d)**  
868 Bacterial number in log CFU observed post secondary challenge in inoculated  
869 leaves of 0.1 mM and 3 mM, *T203* treated WT plants. A significant difference  
870 between 0.1 and 3 mM NO<sub>3</sub><sup>-</sup> is analyzed by t-test at p<0.001 (\*\*\*), p<0.01 (\*\*) and  
871 p<0.05 (\*).

872

873 **Fig. 5: Expression profile of low affinity nitrate transporter genes (LATs) during**  
874 **SAR**

875 Relative expression of *CLCa* gene in **(a)** WT **(b)** WT+*T203* and *NPF1.2* gene in **(c)**  
876 WT **(d)** WT+*T203* grown under 0.1 mM and 3 mM NO<sub>3</sub><sup>-</sup> concentration post



877 secondary challenge in both inoculated and un-inoculated leaves. For all the target  
878 genes, fold expression values are means (n=3) ± SE. A significant difference  
879 between all treatments is analyzed by t-test at p<0.001 (\*\*\*), p<0.01 (\*\*) and p<0.05  
880 (\*) with 3 mM un-inoculated leaves as control in each gene.

881 **Fig. 6: Expression profile of high affinity nitrate transporter genes (HATs)**  
882 **during SAR and response of genotypes (WT and *nrt2.1*) on priming effect of 24**  
883 **h *Trichoderma* pre-treatment w.r.t *PR1* and *NRT2.2* expression on low nitrate**  
884 **fed WT plants**

885 Relative expression of *NRT2.1* in (a) WT (I panel) and (b) WT+*T203* (II panel),  
886 *NRT2.2* in (c) WT (I panel) and (d) WT+*T203* (II panel) and *NRT2.4* in (e) WT (I  
887 panel) and (f) WT+*T203* (II panel) grown under 0.1 mM and 3 mM NO<sub>3</sub><sup>-</sup>  
888 concentration post secondary challenge in both inoculated and un-inoculated leaves.  
889 For all the target genes, fold expression values are means (n=3) ± SE. A significant  
890 difference between all treatments is analyzed by t-test at p<0.001 (\*\*\*), p<0.01 (\*\*) and  
891 p<0.05 (\*) with 3 mM un-inoculated leaves as control in each gene (g) Relative  
892 *PR1* expression in roots of WT and *nrt2.1* plants grown under 0.1 mM NO<sub>3</sub><sup>-</sup>  
893 concentration (with and without *T203* treatment; 24 h). A significant difference  
894 between with and without *T203* treatment is analyzed by t-test at p<0.01 (\*\*) and  
895 p<0.05 (\*) (h) Relative *NRT2.2* expression in roots of WT and *nrt2.1* plants grown  
896 under 0.1 mM NO<sub>3</sub><sup>-</sup> concentration (with and without *T203* treatment; 24 h) (i) Protein  
897 levels in WT and *nrt2.1* plants grown under 0.1 mM NO<sub>3</sub><sup>-</sup> concentration in the  
898 presence or absence of *T203*. A significant difference between with and without  
899 *T203* treatment is analyzed by t-test at p<0.01 (\*\*) and p<0.05 (\*).

900 **Fig. 7: Visualization of nitric oxide by diaminofluorescein (DAF) fluorescence**  
901 Nitric oxide estimation by diaminofluorescein (DAF-FM) fluorescence under 0.1 and  
902 3 mM NO<sub>3</sub><sup>-</sup> concentrations in I. WT, II. *nia1,2* and III. cPTIO (100 µM) grown WT  
903 plants during different periods of *Trichoderma* inoculation. The experiment was  
904 performed three times independently with similar results.

905 **Fig. 8: Response of the genotypes during early stages of *Trichoderma***  
906 **inoculation on *NRT2.1*, *2.2* expression, protein levels and *PR1* expression**



907 **(a)** Relative *NRT2.1* expression in roots of WT, Hb<sup>+</sup>, *nia1,2* and *nrt2.1* plants grown  
908 under 0.1 mM and 3 mM NO<sub>3</sub><sup>-</sup> concentrations, with and without *T203* treatment,  
909 given for 5 minutes and 24 h to the plants. A significant difference between with and  
910 without *T203* treatment is analyzed by t-test at p<0.01 (\*\*) and p<0.05 (\*) **(b)**  
911 Relative *NRT2.2* expression in roots of WT, Hb<sup>+</sup>, *nia1,2* and *nrt2.1* plants grown  
912 under 0.1 mM and 3 mM NO<sub>3</sub><sup>-</sup> concentrations, with and without *T203* treatment, given  
913 for 5 minutes and 24 h to the plants. A significant difference between with and  
914 without *T203* treatment is analyzed by t-test at p<0.01 (\*\*) and p<0.05 (\*) **(c)** Protein  
915 levels measured in WT, Hb<sup>+</sup> and *nia1,2* seedlings grown under 0.1 mM NO<sub>3</sub><sup>-</sup> for 15  
916 days in vertical plates using Bradford's assay. *T203* treatment was given for 24 h to  
917 the plants. A significant difference between with and without *T203* treatment is  
918 analyzed by t-test at p<0.01 (\*\*) and p<0.05 (\*) **(d)** *PR1* gene expression in WT,  
919 Hb<sup>+</sup>, *nia1,2* and *nrt2.1* under 0.1 mM NO<sub>3</sub><sup>-</sup> plants, with and without *Trichoderma*  
920 treatment given for 5 minutes and 24 h to the plants. A significant difference between  
921 with and without *T203* treatment is analyzed by t-test at p<0.01 (\*\*) and p<0.05 (\*).

922 **Fig. 9: Response of WT and NO mutants (Hb<sup>+</sup> and *nia1,2*) grown under 0.1 mM**  
923 **NO<sub>3</sub><sup>-</sup> during LAR and SAR**

924 In LAR response **(a)** HR phenotype in inoculated leaves of WT, Hb<sup>+</sup> and *nia1,2*  
925 plants grown under 0.1 mM NO<sub>3</sub><sup>-</sup> concentration at 0, 6, 24 and 48 hpi **(b)** *In planta*  
926 bacterial growth (log CFU) at 6, 24 and 48 hpi, asterisks indicate a significant  
927 difference (p<0.01; Student's t-test) taking WT as control **(c)** Relative *PR1*  
928 expression in infiltrated leaves during localized infiltration. Values are means (n=3) ±  
929 SE. Asterisks indicate a significant difference (p < 0.01; student's t-test) taking 0 hpi  
930 as control.

931 In SAR response **(d)** HR phenotype in inoculated and uninoculated leaves of WT,  
932 Hb<sup>+</sup> and *nia1,2* plants grown under 0.1 mM NO<sub>3</sub><sup>-</sup> concentration post secondary  
933 challenge **(e)** Bacterial population represented by log CFU at 6, 24 and 48 hpc,  
934 asterisks indicate a significant difference (p < 0.01; Student's t-test) taking 3 mM WT  
935 as control **(f)** Relative *PR1* gene expression in infiltrated leaves post secondary  
936 challenge. Values are means (n=3) ± SE. Asterisks indicate a significant difference  
937 (p < 0.01; Student's t-test) taking 0 hpc as control.

938 **Fig. 10: Detection of ROS by measuring H<sub>2</sub>O<sub>2</sub> and O<sub>2</sub><sup>-</sup> in 0.1 mM and 3 mM NO<sub>3</sub><sup>-</sup>**  
939 **WT and *Trichoderma* grown WT plants during SAR response**

940 **(a)** DAB staining used to measure H<sub>2</sub>O<sub>2</sub> levels in the inoculated leaves and  
941 uninoculated leaves after 3 days of challenge inoculation at 0, 6, 24 and 48 hpc.  
942 Representative leaves are shown, and the experiment was repeated three times with  
943 10 leaves each. Scale bar =1 mm.

944 **(b)** NBT staining used to measure O<sub>2</sub><sup>-</sup> levels in the inoculated leaves and  
945 uninoculated leaves post challenge inoculation at 0, 6, 24 and 48 hpc.  
946 Representative leaves are shown, and the experiment was repeated three times with  
947 10 leaves each. Scale bar =1 mm.

948 **Fig. 11: Expression profiles of defense related genes during SAR**

949 Relative expression of defense related genes in WT(I panel) and WT+*T203* (II  
950 panel) grown under low (0.1 mM) and optimum (3 mM) NO<sub>3</sub><sup>-</sup> concentration post  
951 secondary challenge of *Pst*DC3000 in both inoculated and uninoculated leaves **(a)**  
952 Relative expression of *PAL1* **(b)** Relative expression of *PR1* **(c)** Relative expression  
953 of *PR2* **(d)** Relative expression of *PR5*. For all the target genes, fold expression  
954 values are means (n=3) ± SE. A significant difference between all treatments is  
955 analyzed by t-test at p<0.001 (\*\*\*), p<0.01 (\*\*) and p<0.05 (\*) with 3 mM  
956 uninoculated leaves as control in each gene.

957 **Fig. 12: Expression profiles of regulatory SAR genes**

958 Relative expression of SAR regulatory gene in WT (I panel) and WT+*T203* (II panel)  
959 grown under low (0.1 mM) and optimum (3 mM) NO<sub>3</sub><sup>-</sup> concentration post secondary  
960 challenge of *Pst*DC3000 in both inoculated and uninoculated leaves **(a)** Relative  
961 expression of *DIR1* **(b)** Relative expression of *NPR1* **(c)** Relative expression of  
962 *SARD1* **(d)** Relative expression of *TGA3*. For all the target genes, fold expression  
963 values are means (n=3) ± SE. A significant difference between all treatments is  
964 analyzed by t-test at p<0.001 (\*\*\*), p<0.01 (\*\*) and p<0.05 (\*) with 3mM  
965 uninoculated leaves as control in each gene.

966

967 **Fig. 13: LAR and SAR response in *nrt2.1* and *npr1* mutants to virulent *Pst***  
968 **DC3000**

969 **(a)** LAR disease symptoms to virulent *Pst* DC3000 in *nrt2.1* and *npr1* mutant in 0.1  
970 and 3 mM nitrate **(b)** Bacterial growth in WT, *nrt2.1* and *npr1* mutant **(c)** Phenotype  
971 during SAR response in *nrt2.1* and *npr1* mutant in 0.1 and 3 mM nitrate **(d)** Bacterial  
972 growth in WT, *nrt2.1* and *npr1* mutant during SAR response. A significant difference  
973 between 0.1 and 3 mM nitrate is analyzed by t-test at  $p < 0.01$  (\*\*) and  $p < 0.05$  (\*).

974 **Fig. 14: SA Accumulation during SAR, and response of *nahg* mutant in the**  
975 **presence and absence of *Trichoderma* during SAR**

976 **(a)** Total (free glucose conjugate) SA levels ( $\mu\text{g g}^{-1}$  fresh weight) were determined  
977 post challenge inoculation (24 hpc) in inoculated and uninoculated leaves of 0.1 mM  
978 and 3 mM  $\text{NO}_3^-$  fed WT plants, with and without *Trichoderma*. Asterisks indicate  
979 mean values that are significantly different according to ( $p < 0.01$ ; Student's t-test)  
980 with 3 mM uninoculated leaves as control **(b)** HR phenotype in inoculated and un-  
981 inoculated distal leaves of *nahg* mutants grown under 0.1 and 3 mM  $\text{NO}_3^-$   
982 concentration post secondary challenge at 6, 24 and 48 hpc **(c)** Bacterial number  
983 represented by log CFU at 6, 24 and 48 hpc from the inoculated leaves post  
984 secondary challenge **(d)** *PR1* gene expression in inoculated and uninoculated leaves  
985 of *nahg* mutants grown under 0.1 and 3 mM  $\text{NO}_3^-$  with and without *Trichoderma*  
986 treatment post secondary challenge. Values are means ( $n=3$ )  $\pm$  SE. A significant  
987 difference between with and without *T203* treatment is analyzed by t-test at  $p < 0.01$   
988 (\*\*) and  $p < 0.05$  (\*).

989 **Fig. 15: A model depicting mechanism of *Trichoderma* induced systemic response**  
990 **(T-ISR) under low nitrate conditions during pathogen infection in Arabidopsis.**

991 **(a)** After root colonization, *Trichoderma* induces short term nitric oxide (NO; green  
992 dots) which facilitate faster nitrate uptake by activating HATs (*NRT2.1*, *2.2* and *2.4*).  
993 The HATs mediated nitrate uptake in turn activates the vacuolar LATs (*CLCa* and  
994 *NPF1.2*) in the mesophyll cells allows source to sink re-mobilization of available  
995 nitrate from roots to other aerial parts. During primary inoculation (local pathogen  
996 attack; *avrRpm1*), NO and ROS signals both are produced during hypersensitive  
997 response (HR), along with salicylic acid (SA), but their basal levels are greatly  
998 enhanced due to *Trichoderma* via increased N uptake, increased SA, ROS and NO..  
999 *Trichoderma* induced SA (produced during local infection) gets rapidly translocated

1000 to the other uninfected distal parts of the plant and pre-programs the stressed plant  
1001 for subsequent pathogen attack.

1002 **(b)** *Trichoderma* activates PR proteins and cause SA accumulation in locally infected  
1003 leaves during T-ISR. These signals are transported to the other part of the plant by  
1004 activating a set of regulatory genes (*DIR1*, *NPR1*, *SARD1*, *TGA3*) involved in SAR  
1005 response. The SA signal transduction mediated by *DIR1* *NPR1* and *TGA3* was  
1006 evidenced by their induced expression in systemic leaves in the presence of  
1007 *Trichoderma*. Moreover, induced *SARD1* expression activates the SA biosynthetic  
1008 genes (*ICS1*) in the systemic leaves. All these genes are involved in translocating  
1009 these signals from locally infected leaf to the uninfected parts of the plant.  
1010 Consequently, *Trichoderma* helps in the accumulation of PR proteins and SA in the  
1011 uninfected leaves, thus allowing the low nitrate stress plants to show enhanced  
1012 resistance.

### 1013 **Supplementary Information**

1014 **Fig S1:** Phenotype of plants grown in different nitrate nutrition pre- and post  
1015 challenge inoculation

1016 **Fig S2:** Electrolyte leakage of mock plants and morphological growth parameters  
1017 during SAR

1018 **Fig S3:** Histochemical detection of ROS and its quantification

1019 **Fig S4:** Histochemical detection of cell death

1020 **Table S1:** List of primers

**Fig 1**

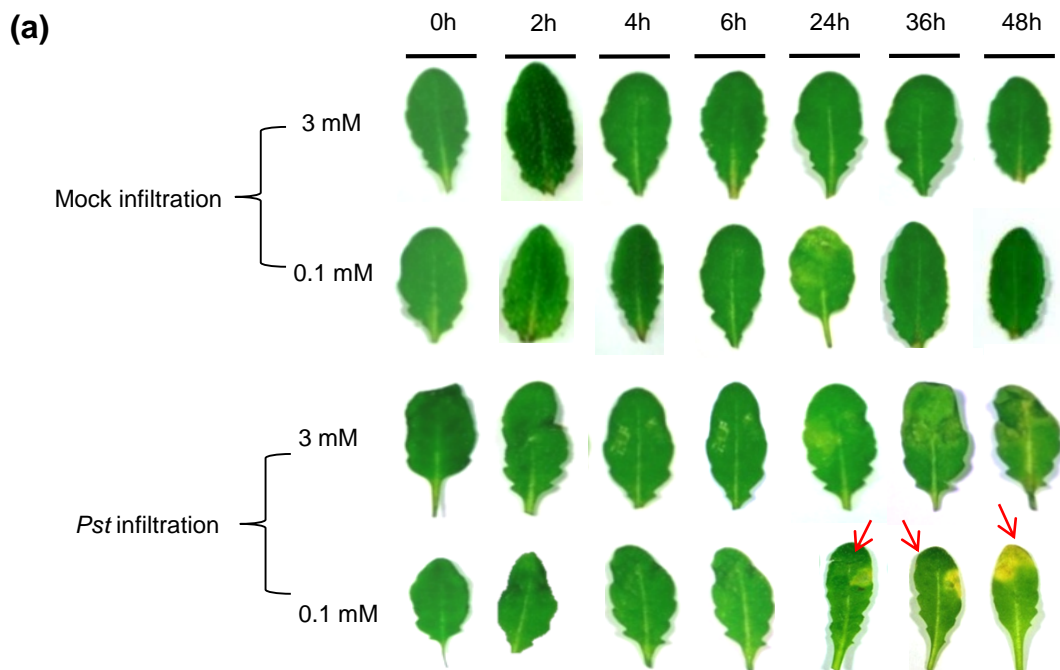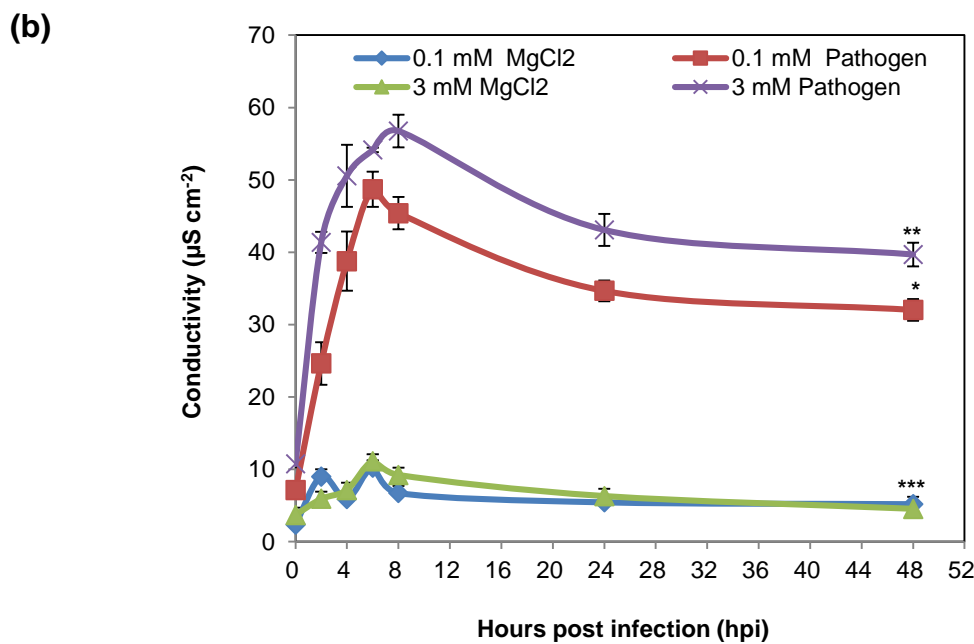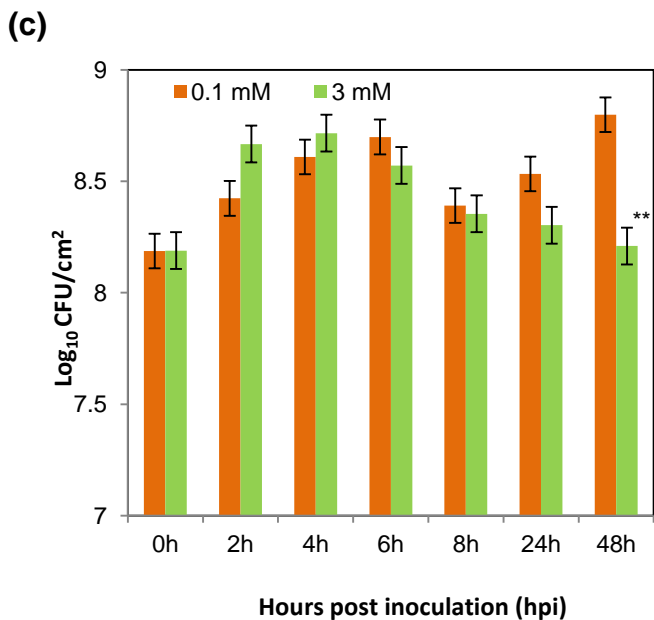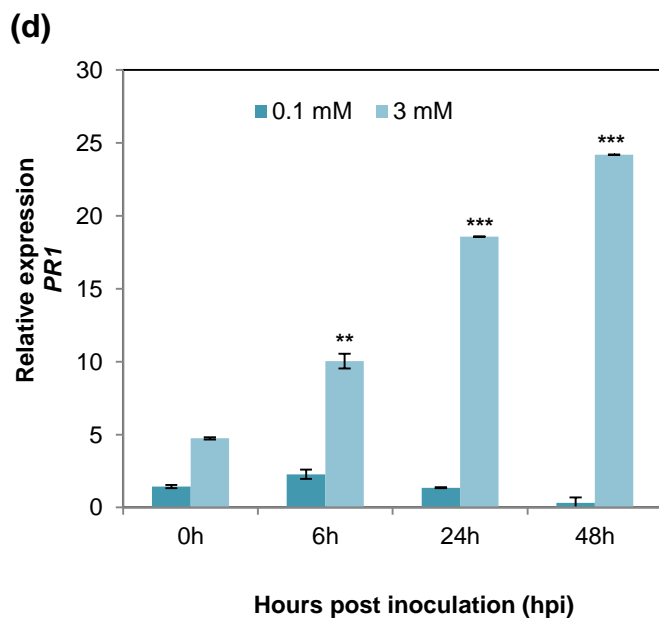

**Fig. 2**

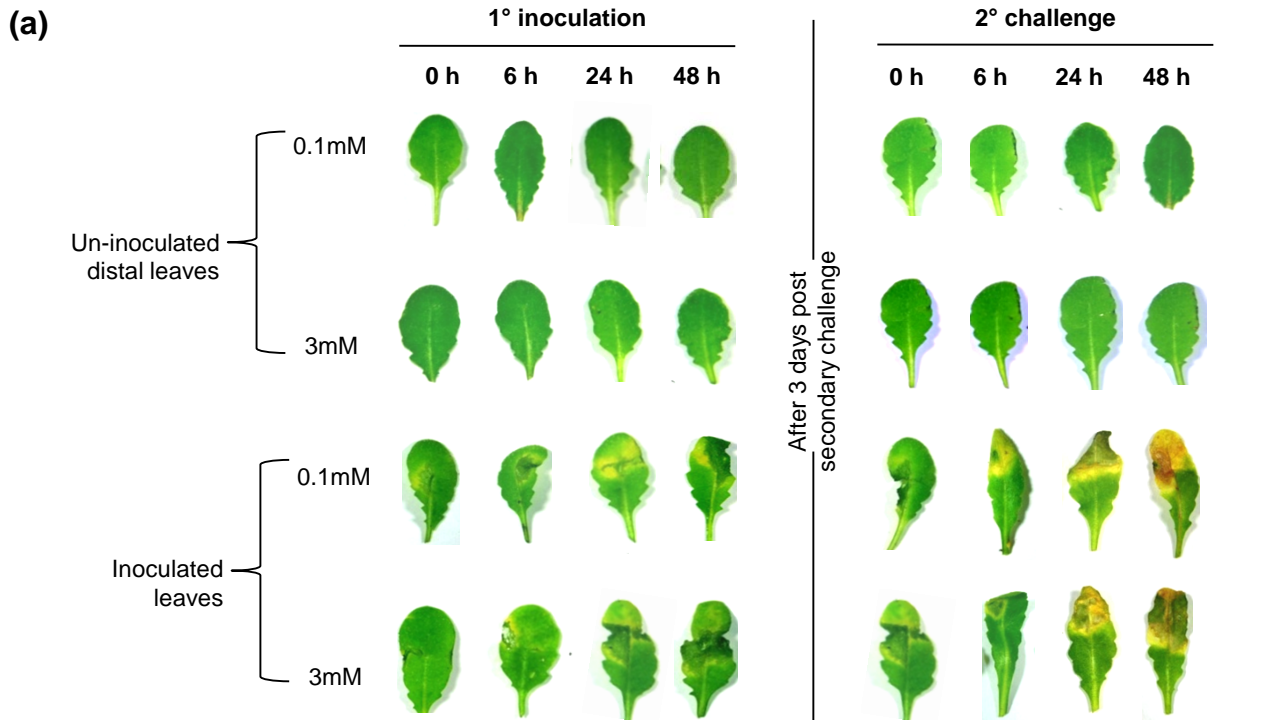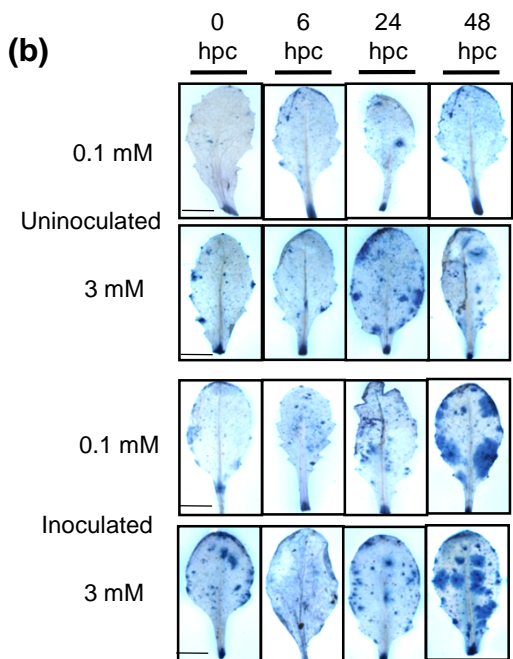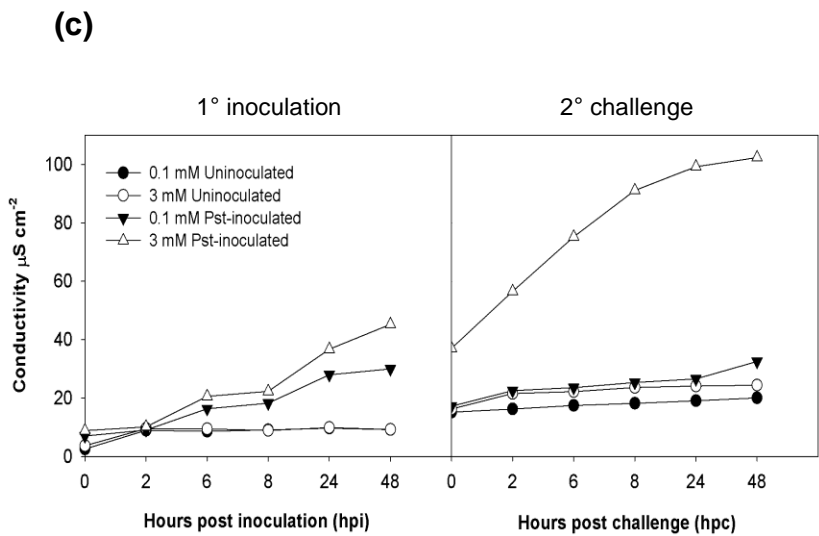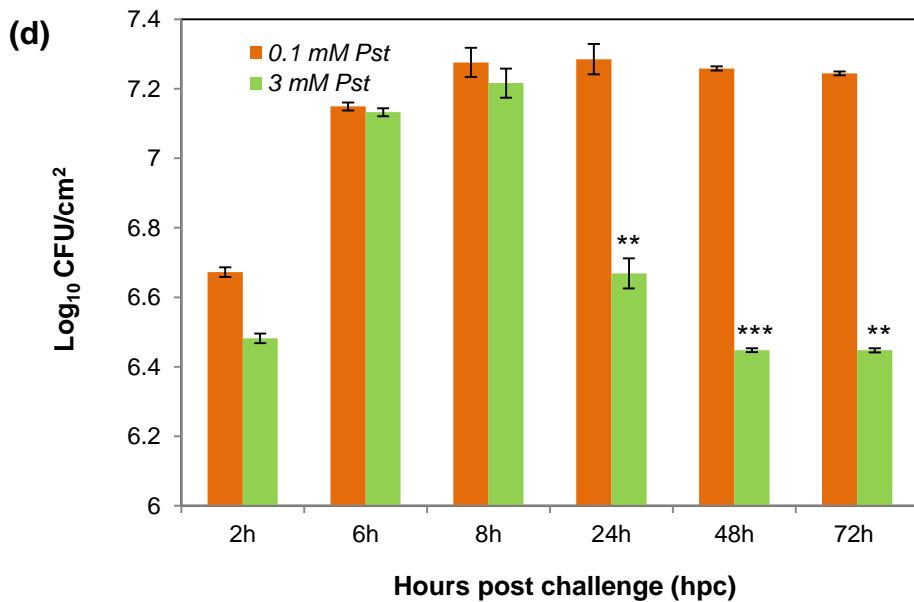

**Fig. 3**

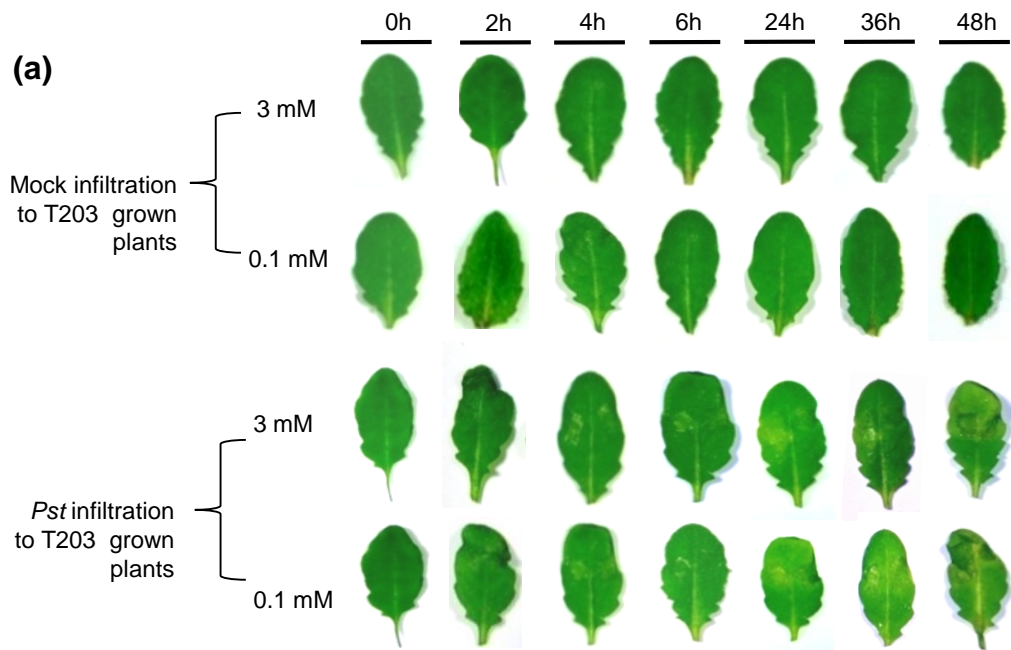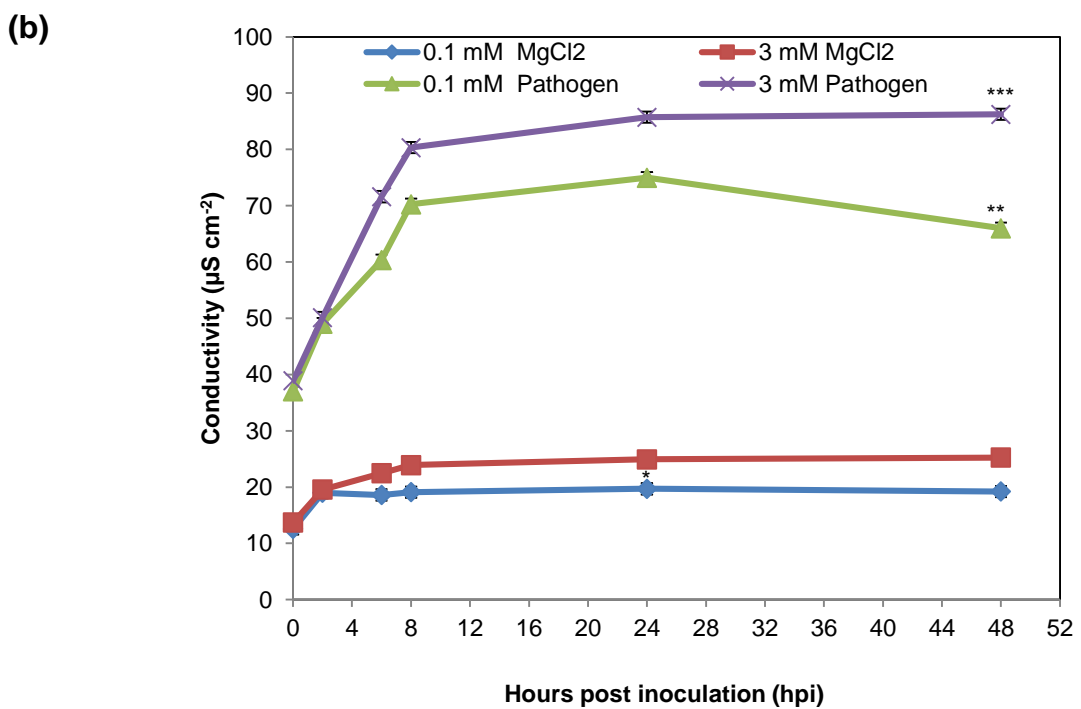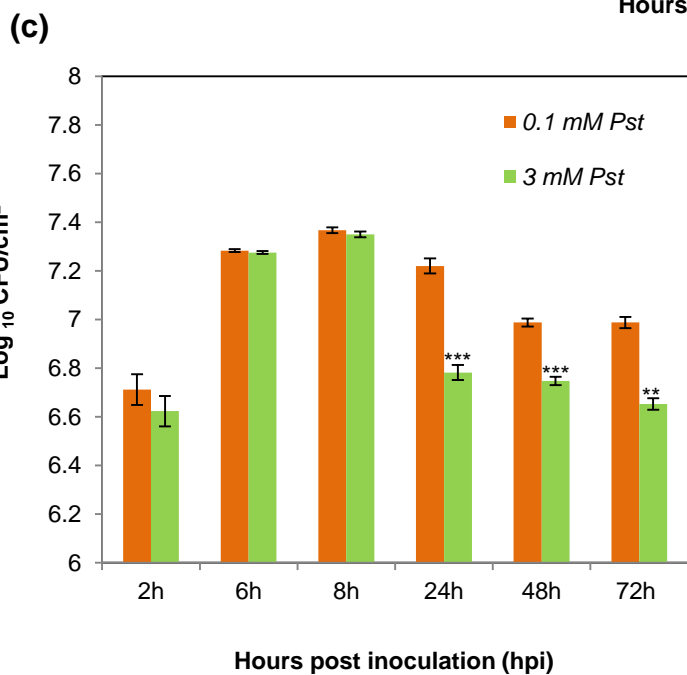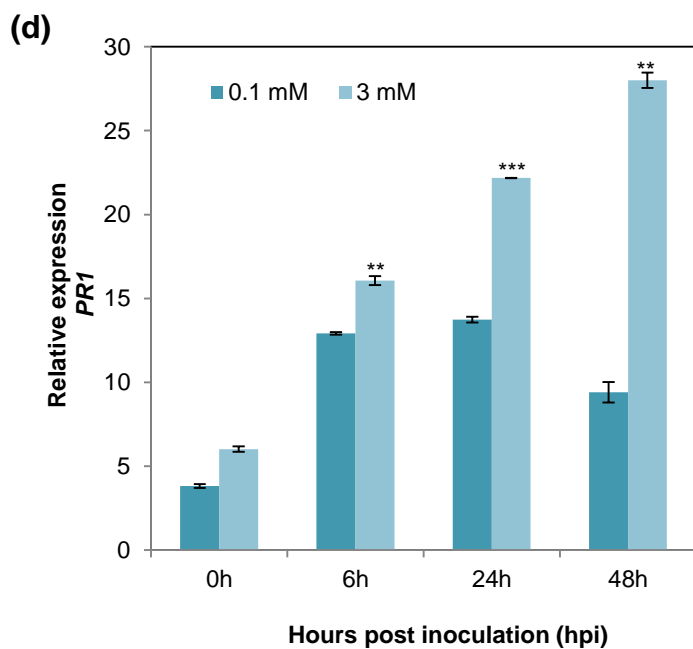



Fig.4

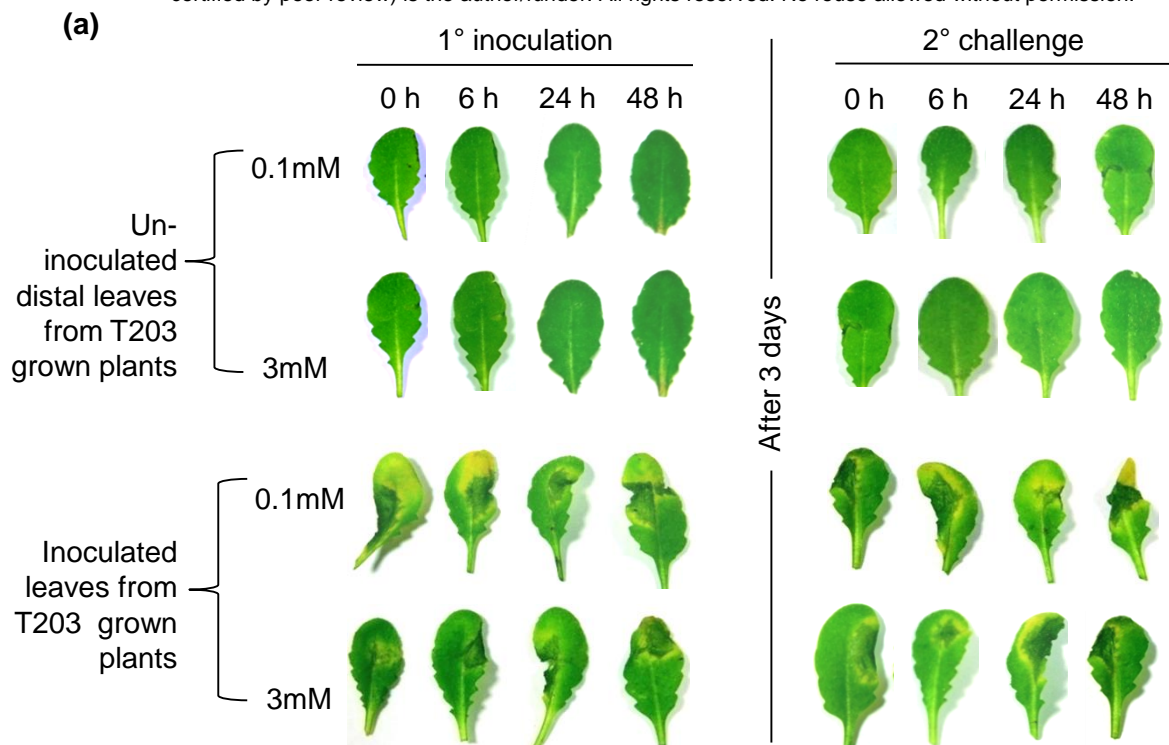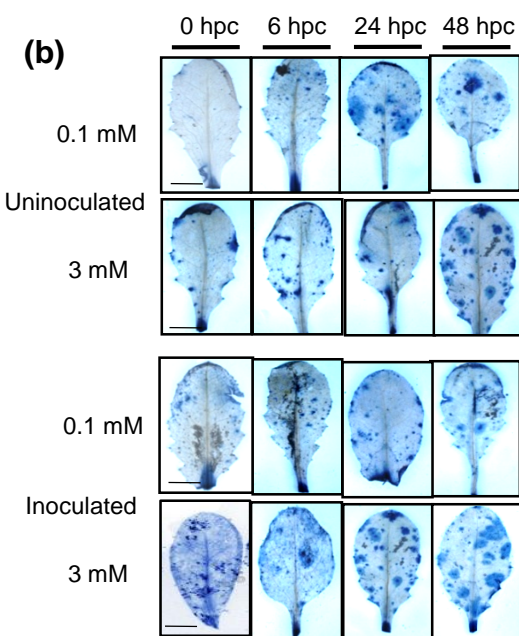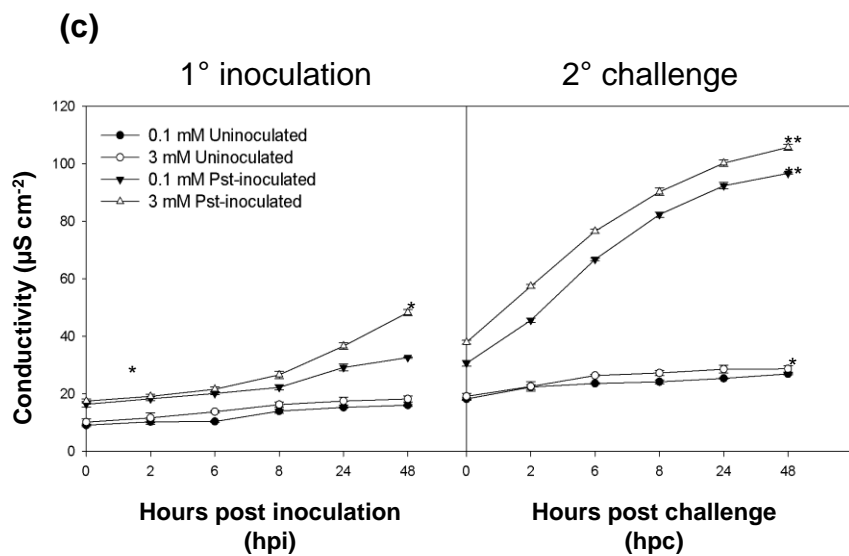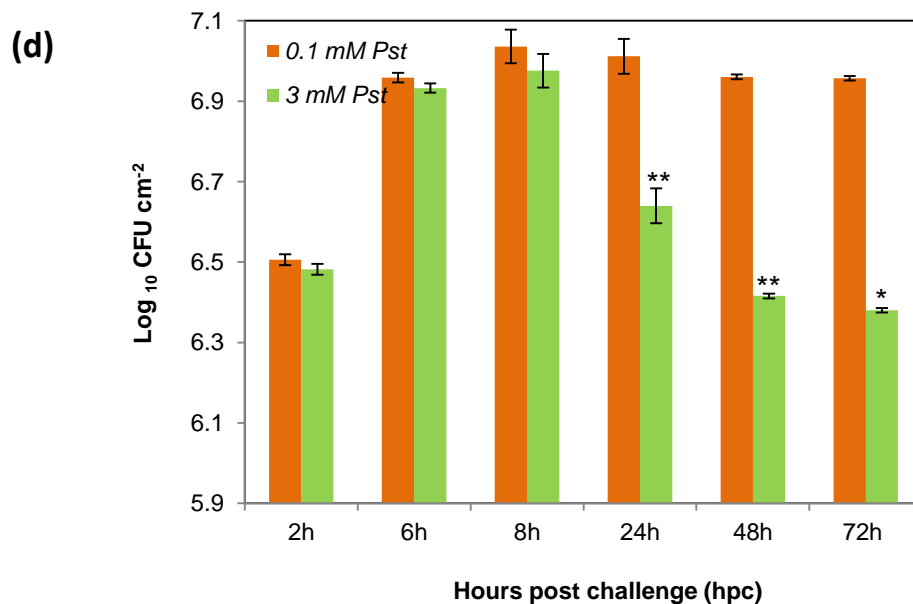

**Fig 5**

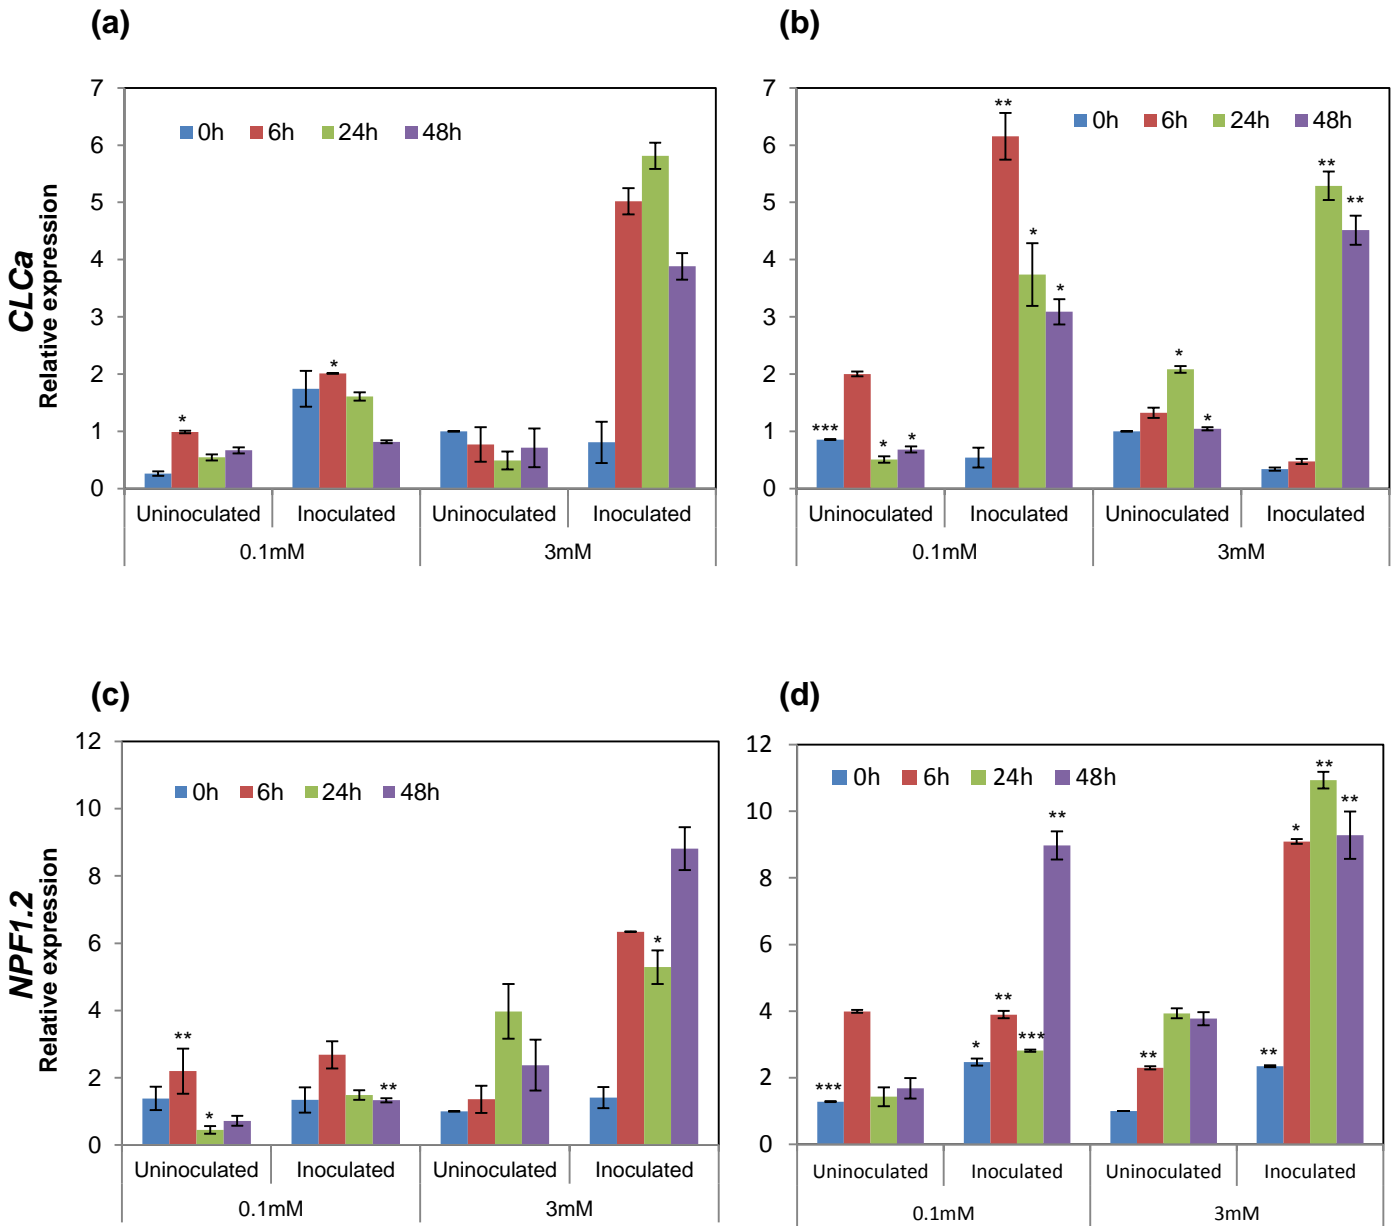

**Fig 6**

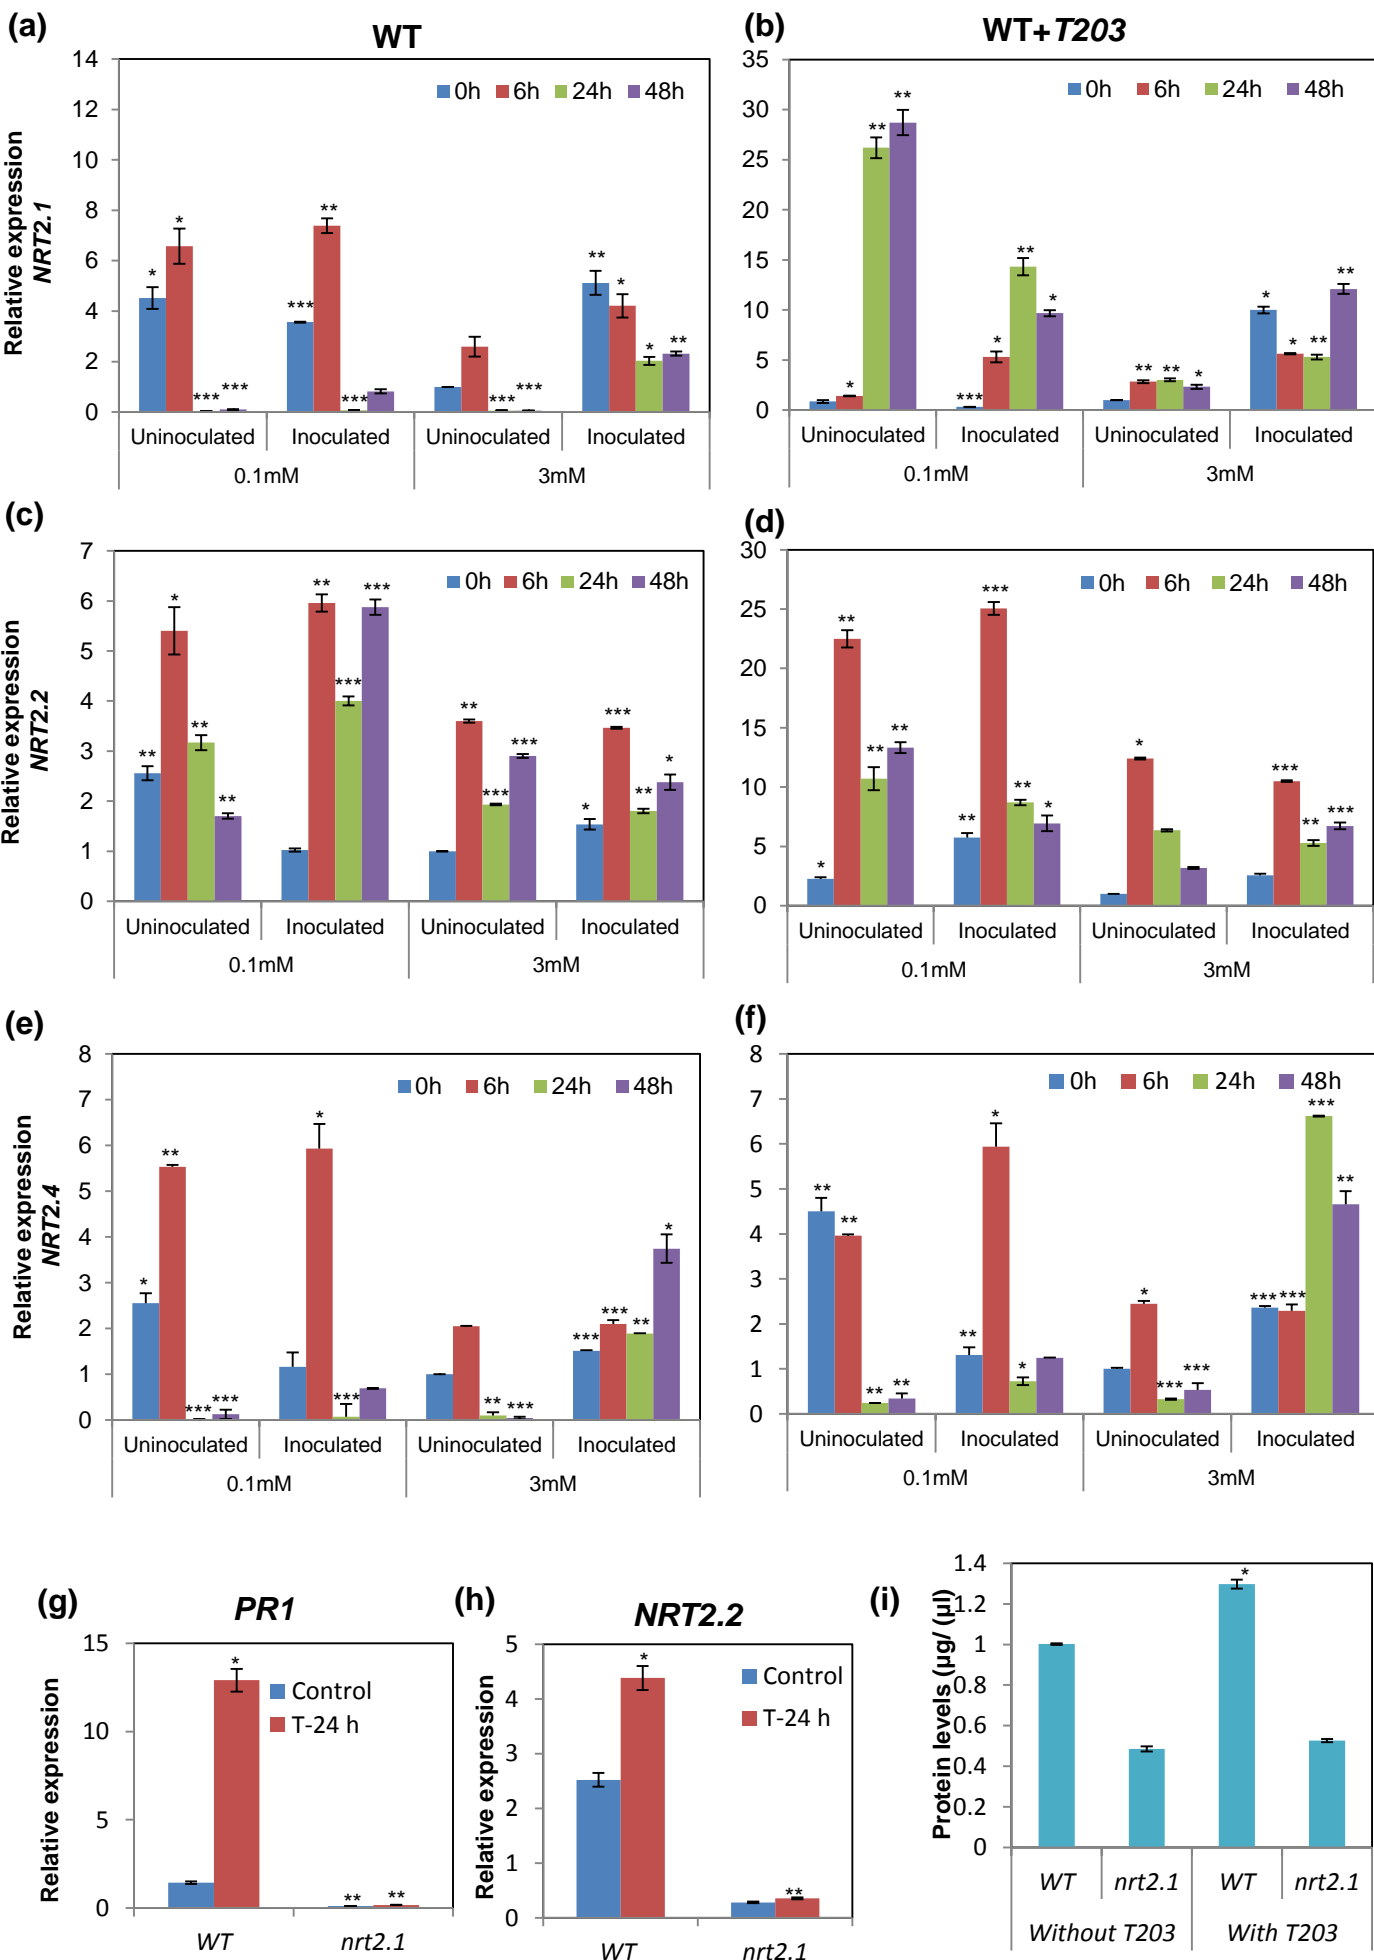

Fig. 7

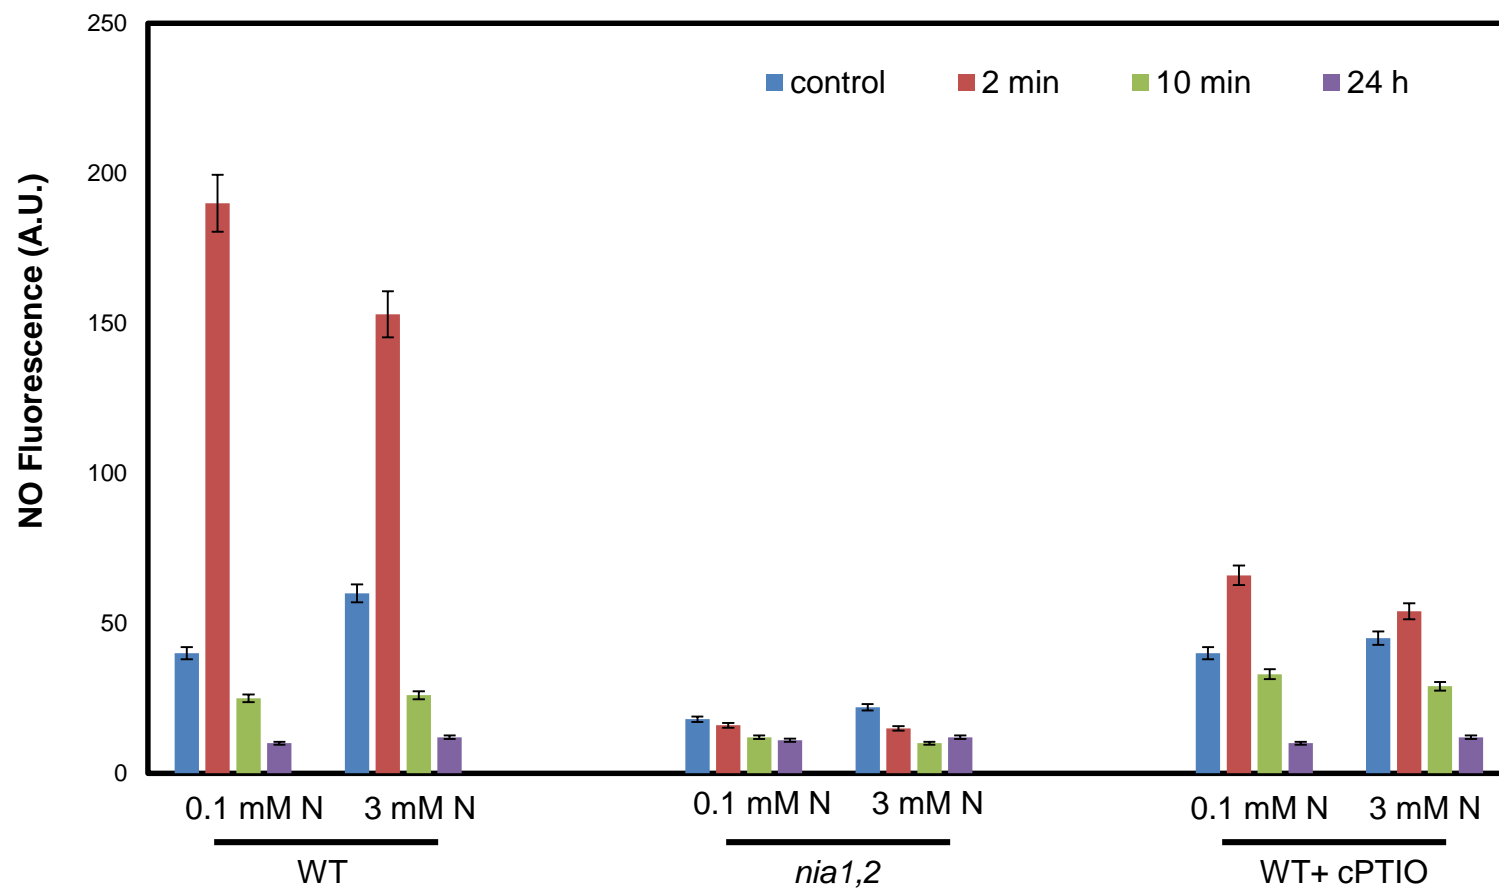

**Fig. 8**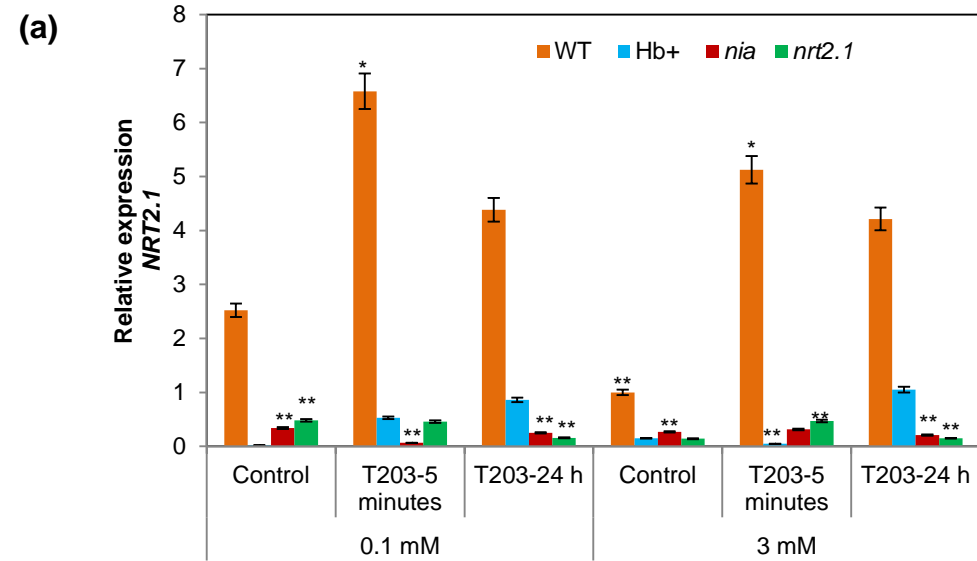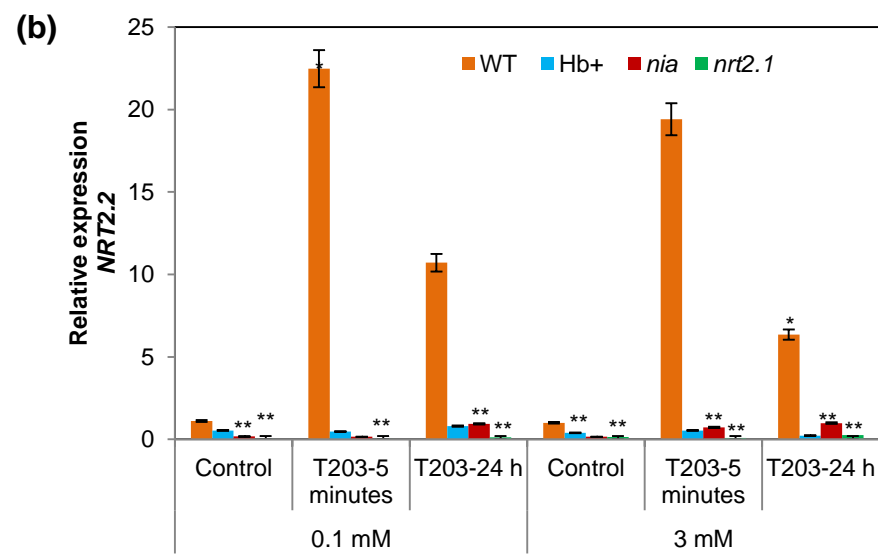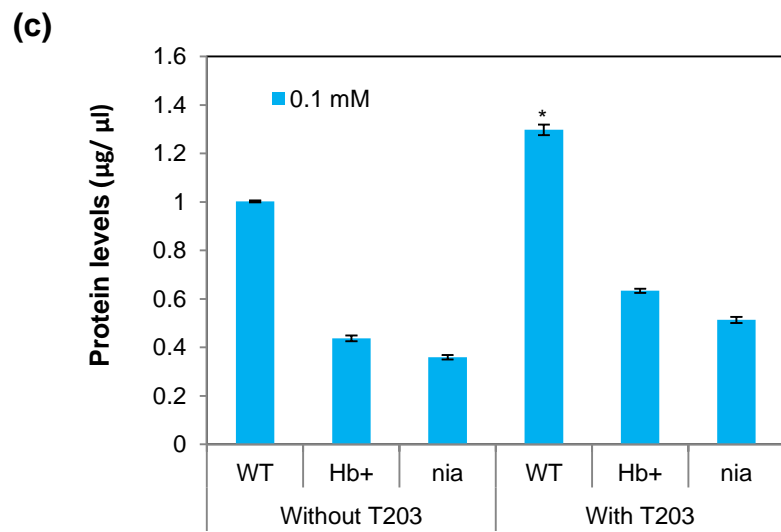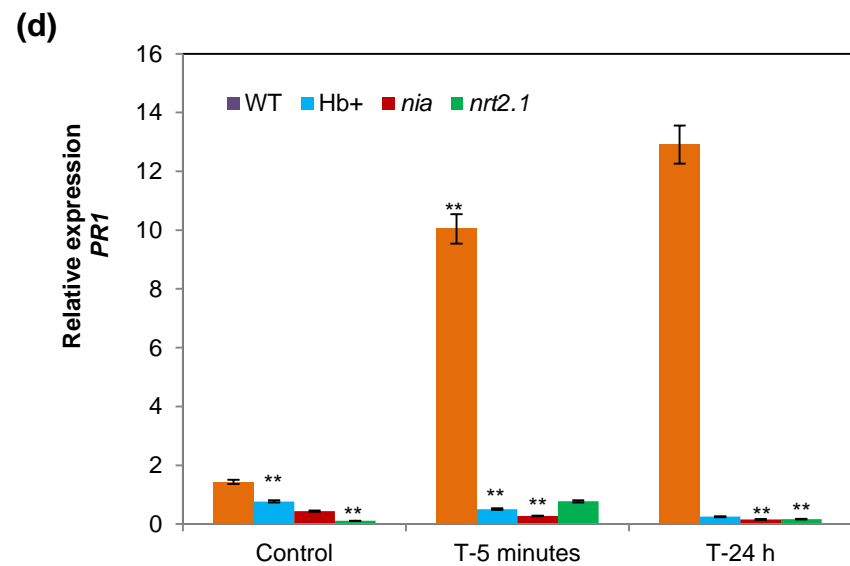

**Fig. 9****(a)**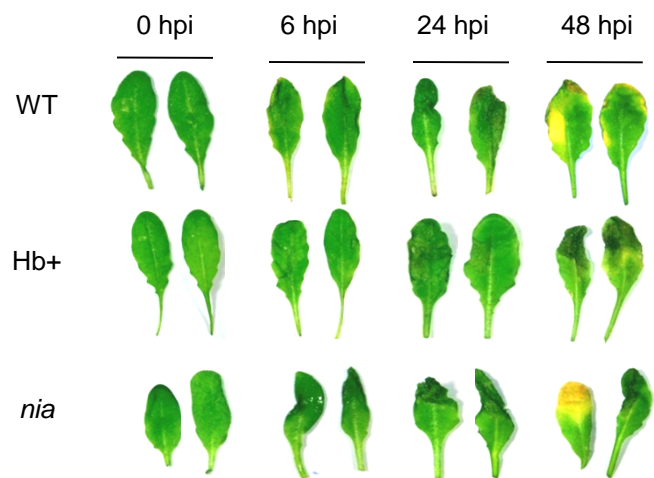**(b)**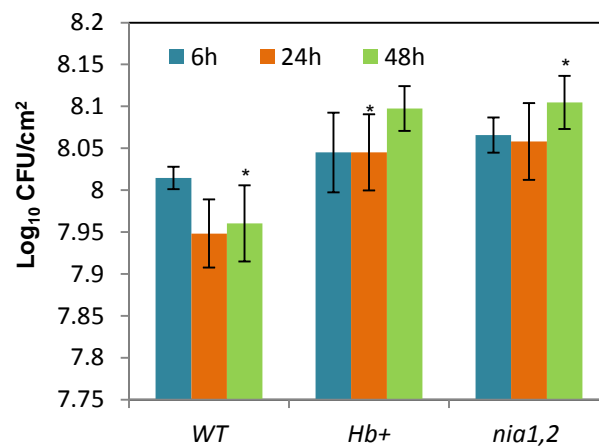**(c)**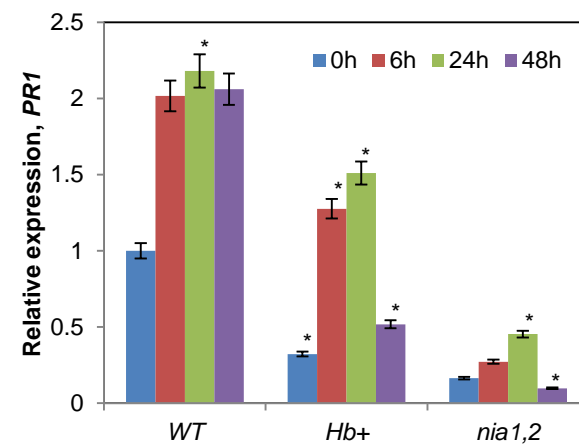**(d)**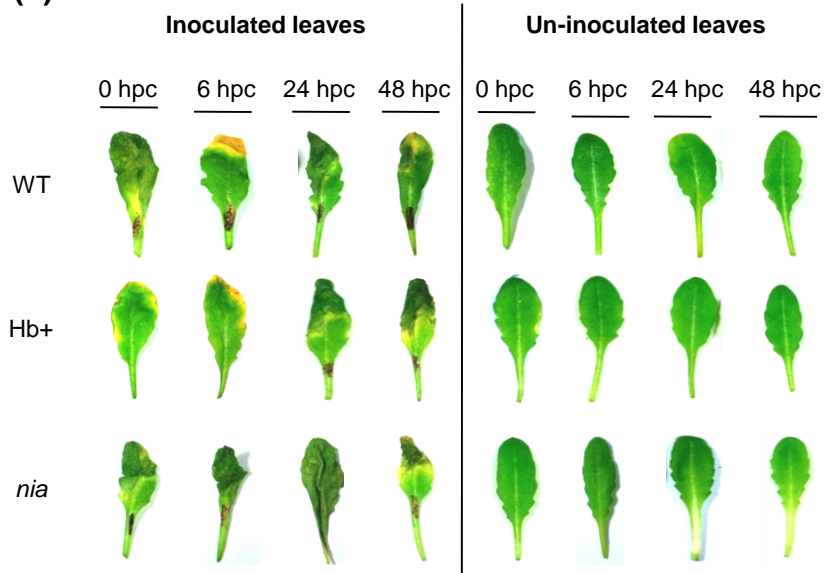**(e)**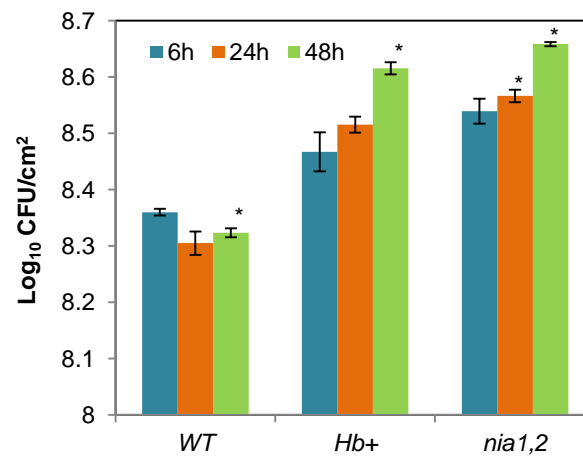**(f)**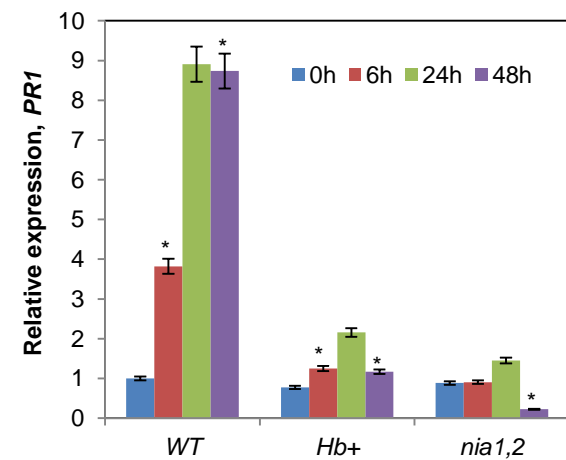



**Fig. 10**

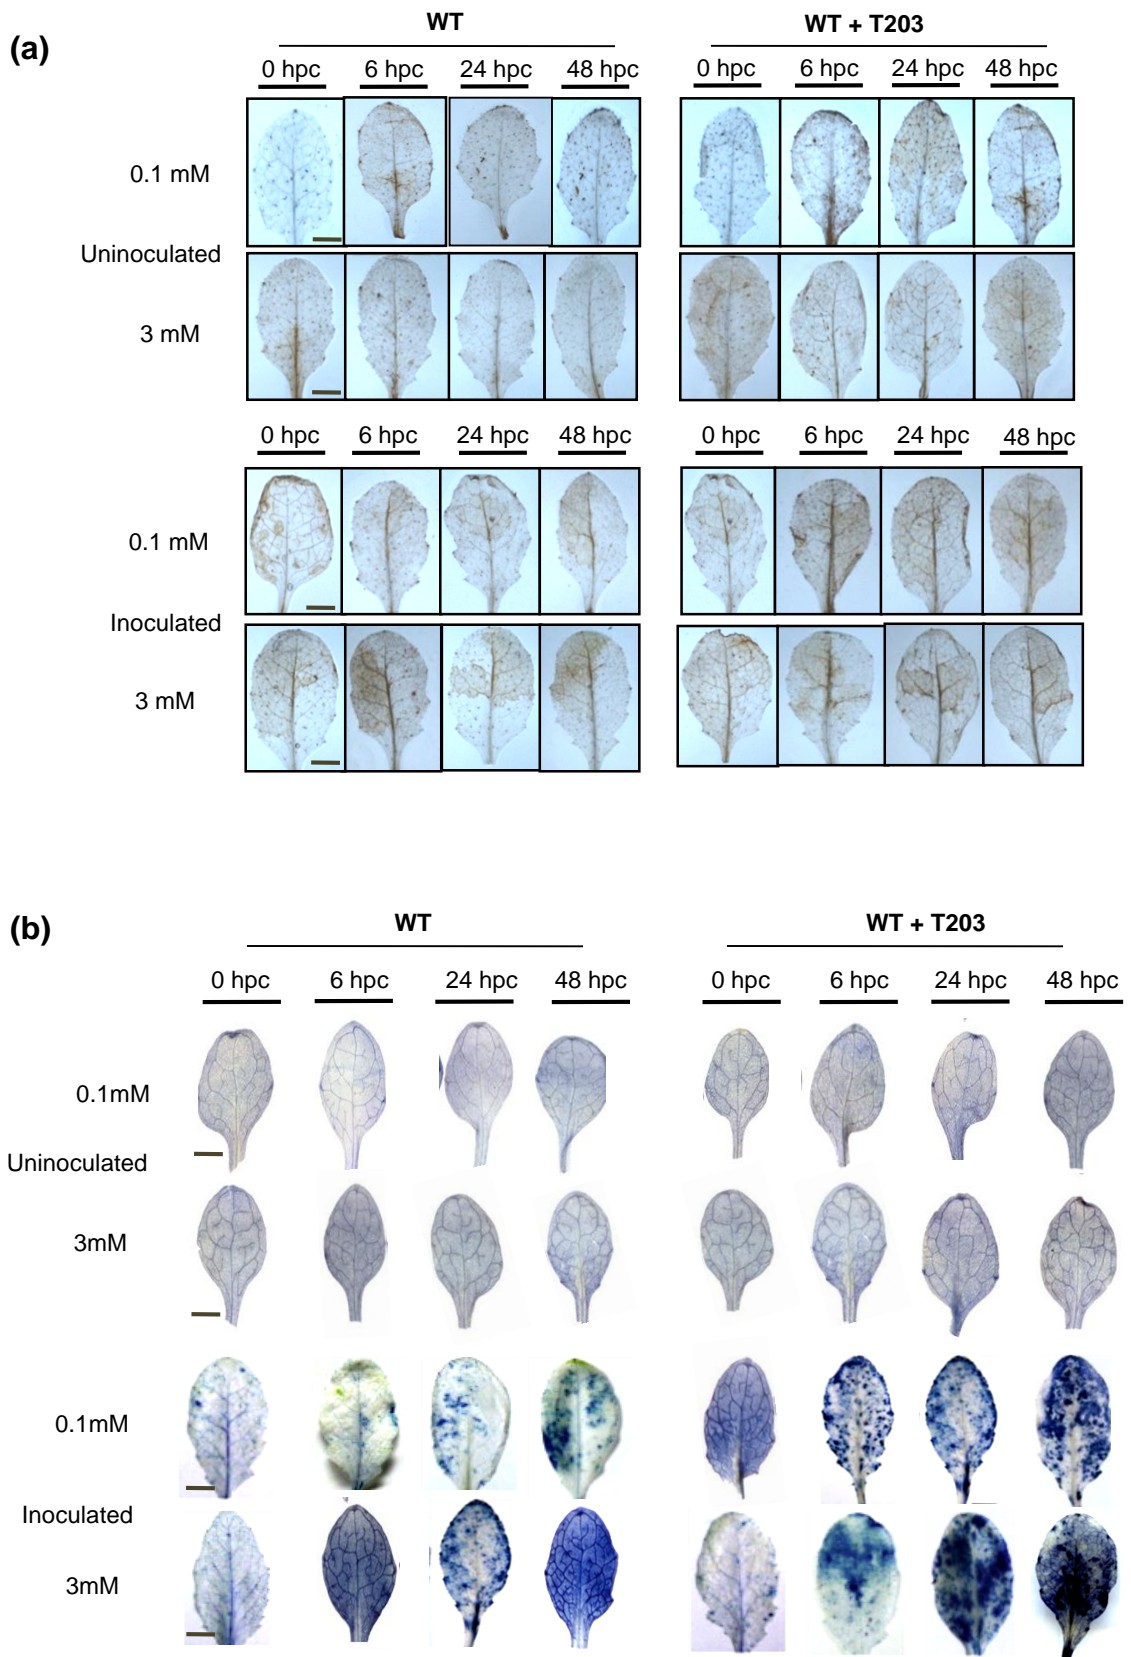

**Fig. 11**

**I. WT**

**II. WT+T203**

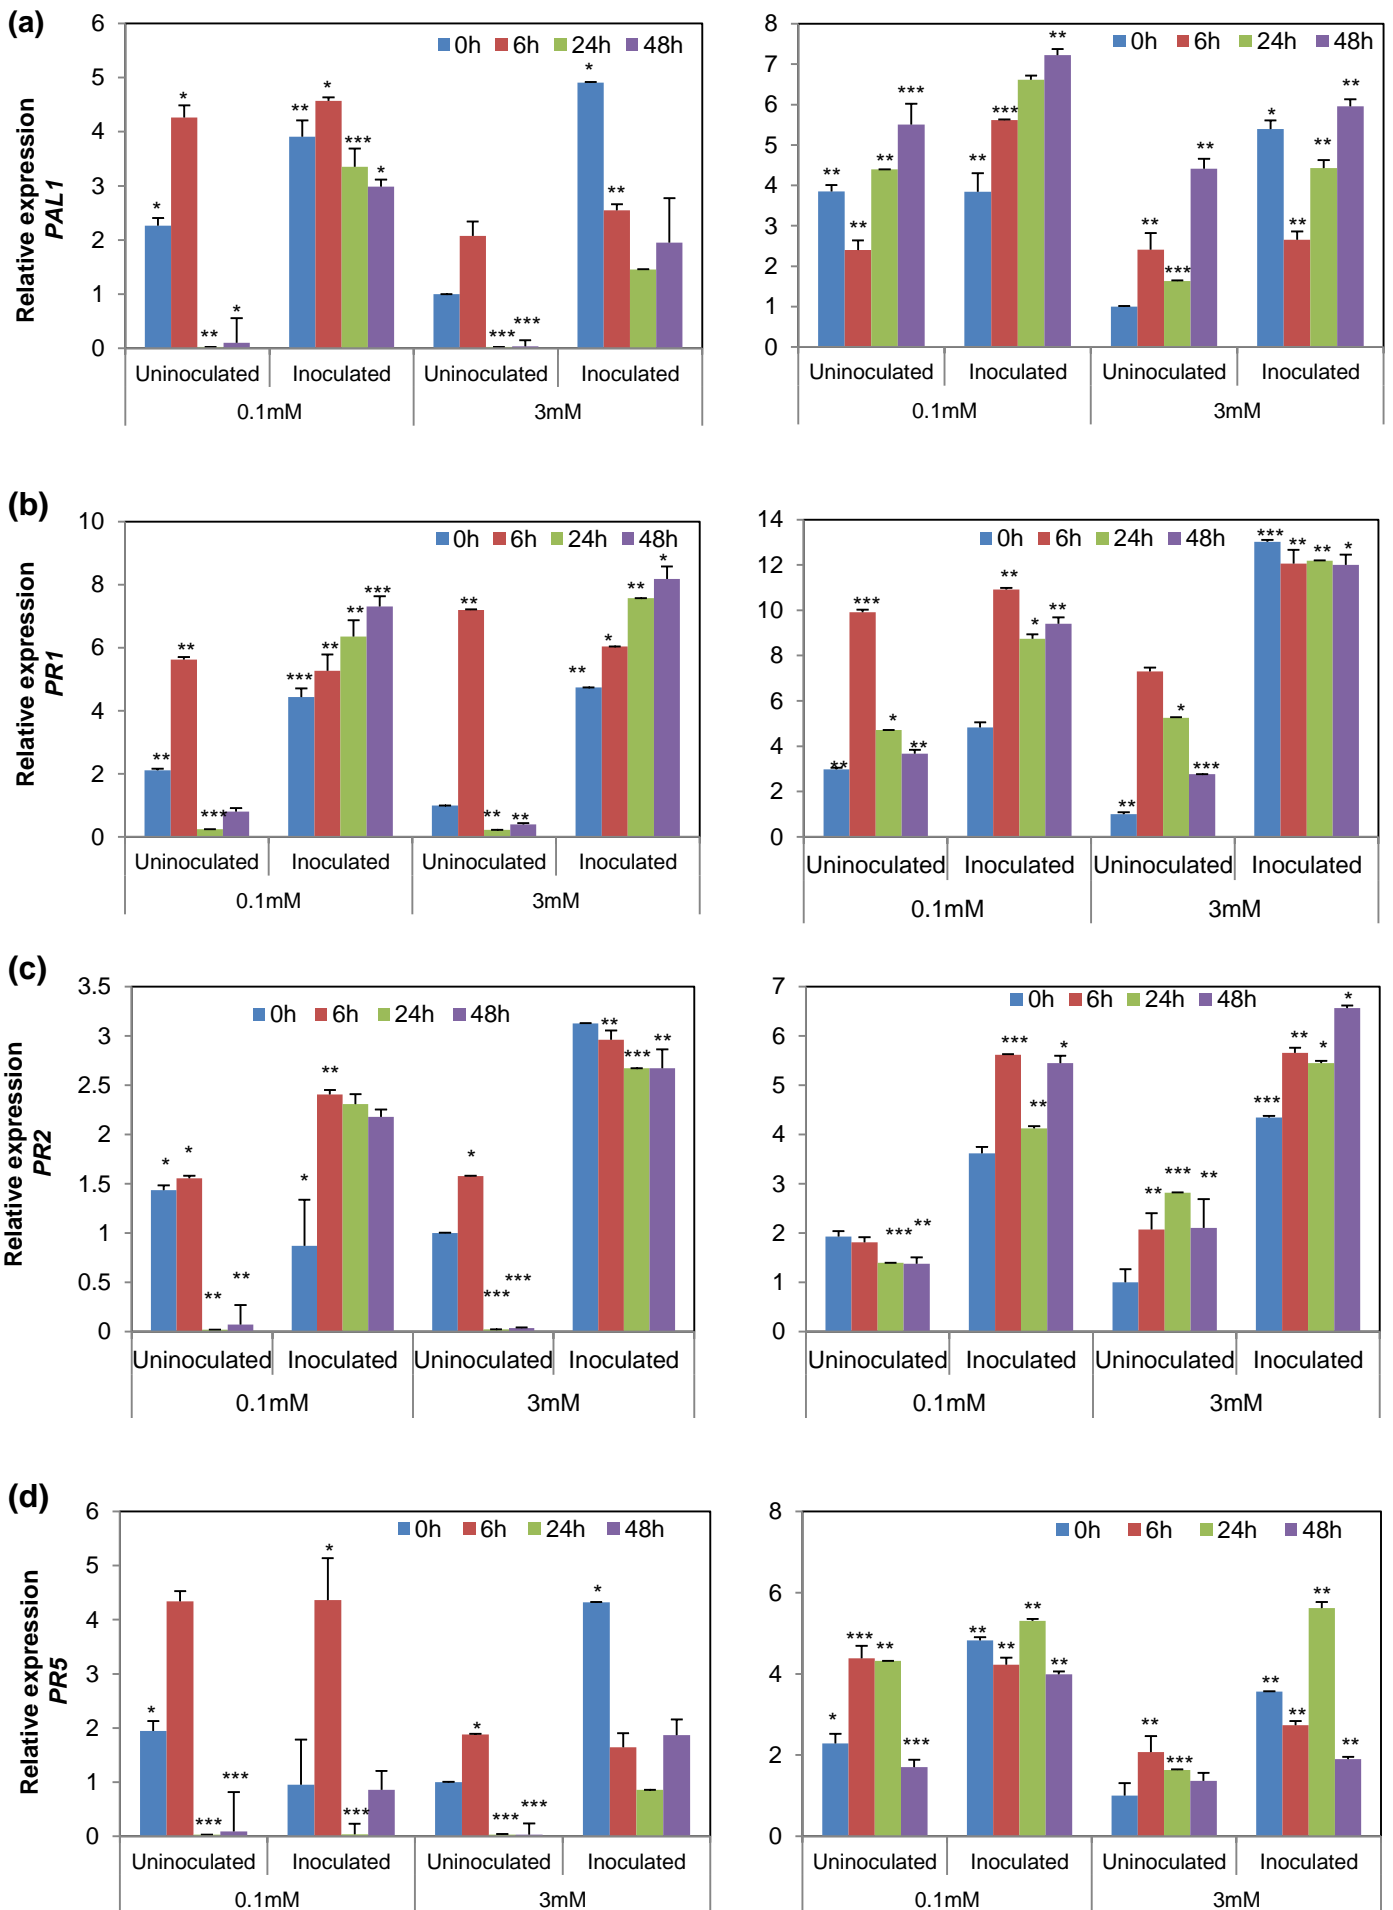

**Fig. 12**

**I. WT**

**II. WT + T203**

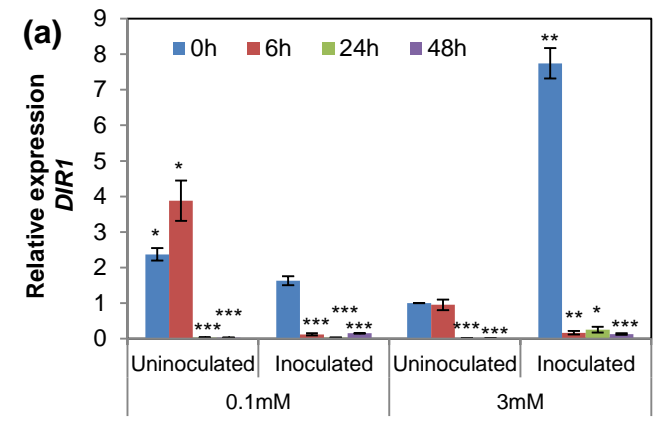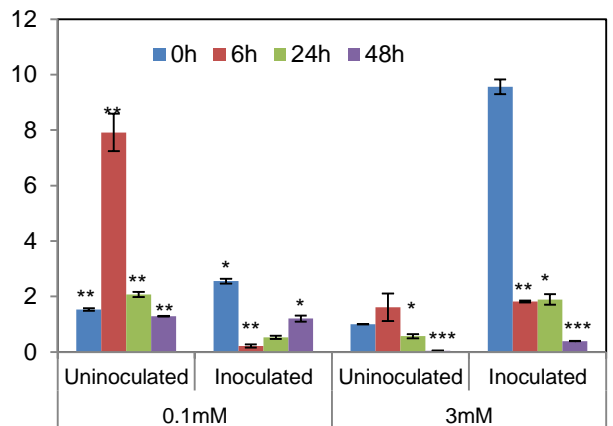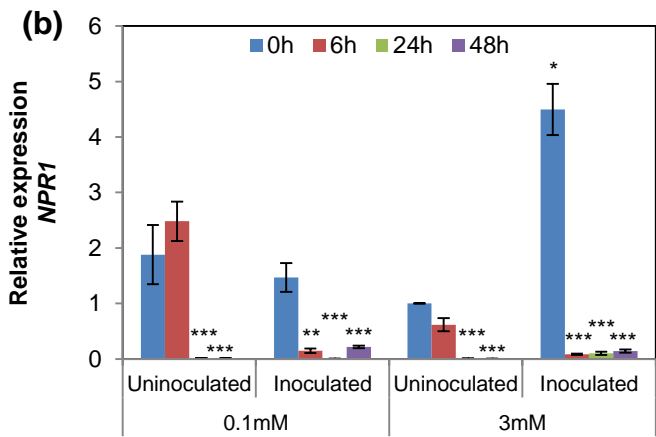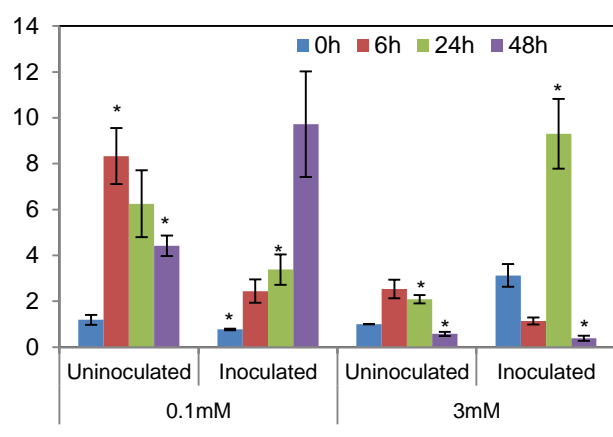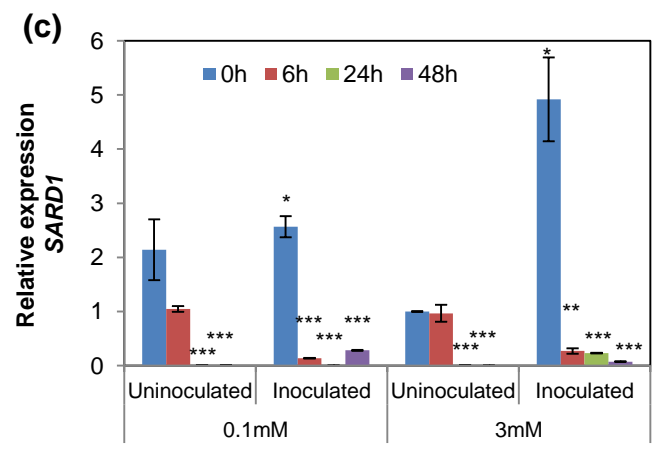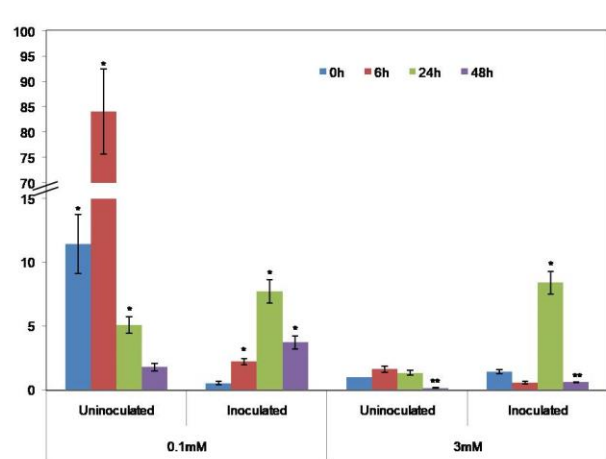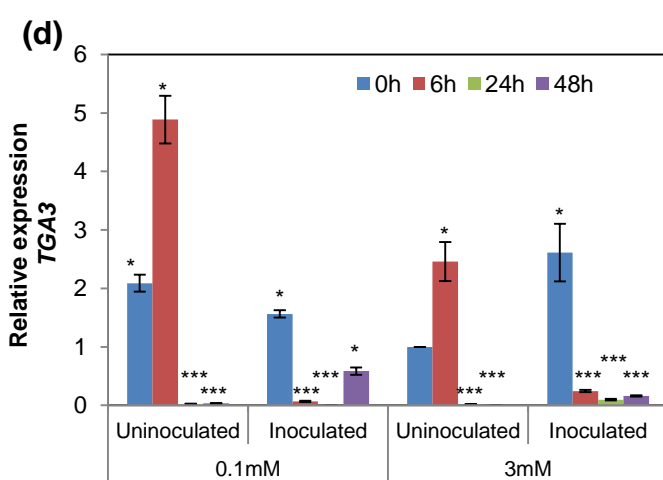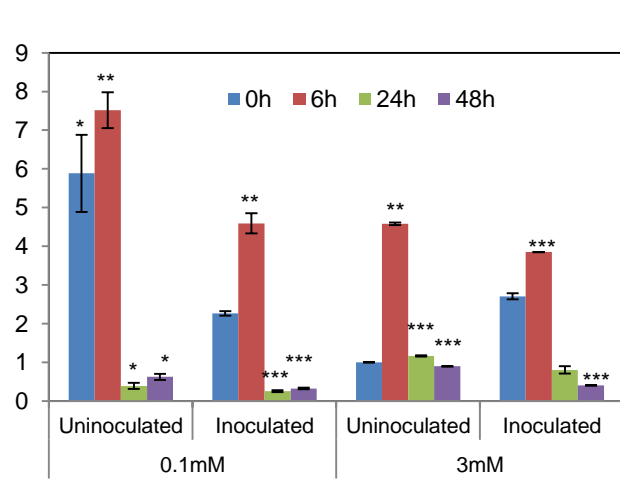

**Fig. 13**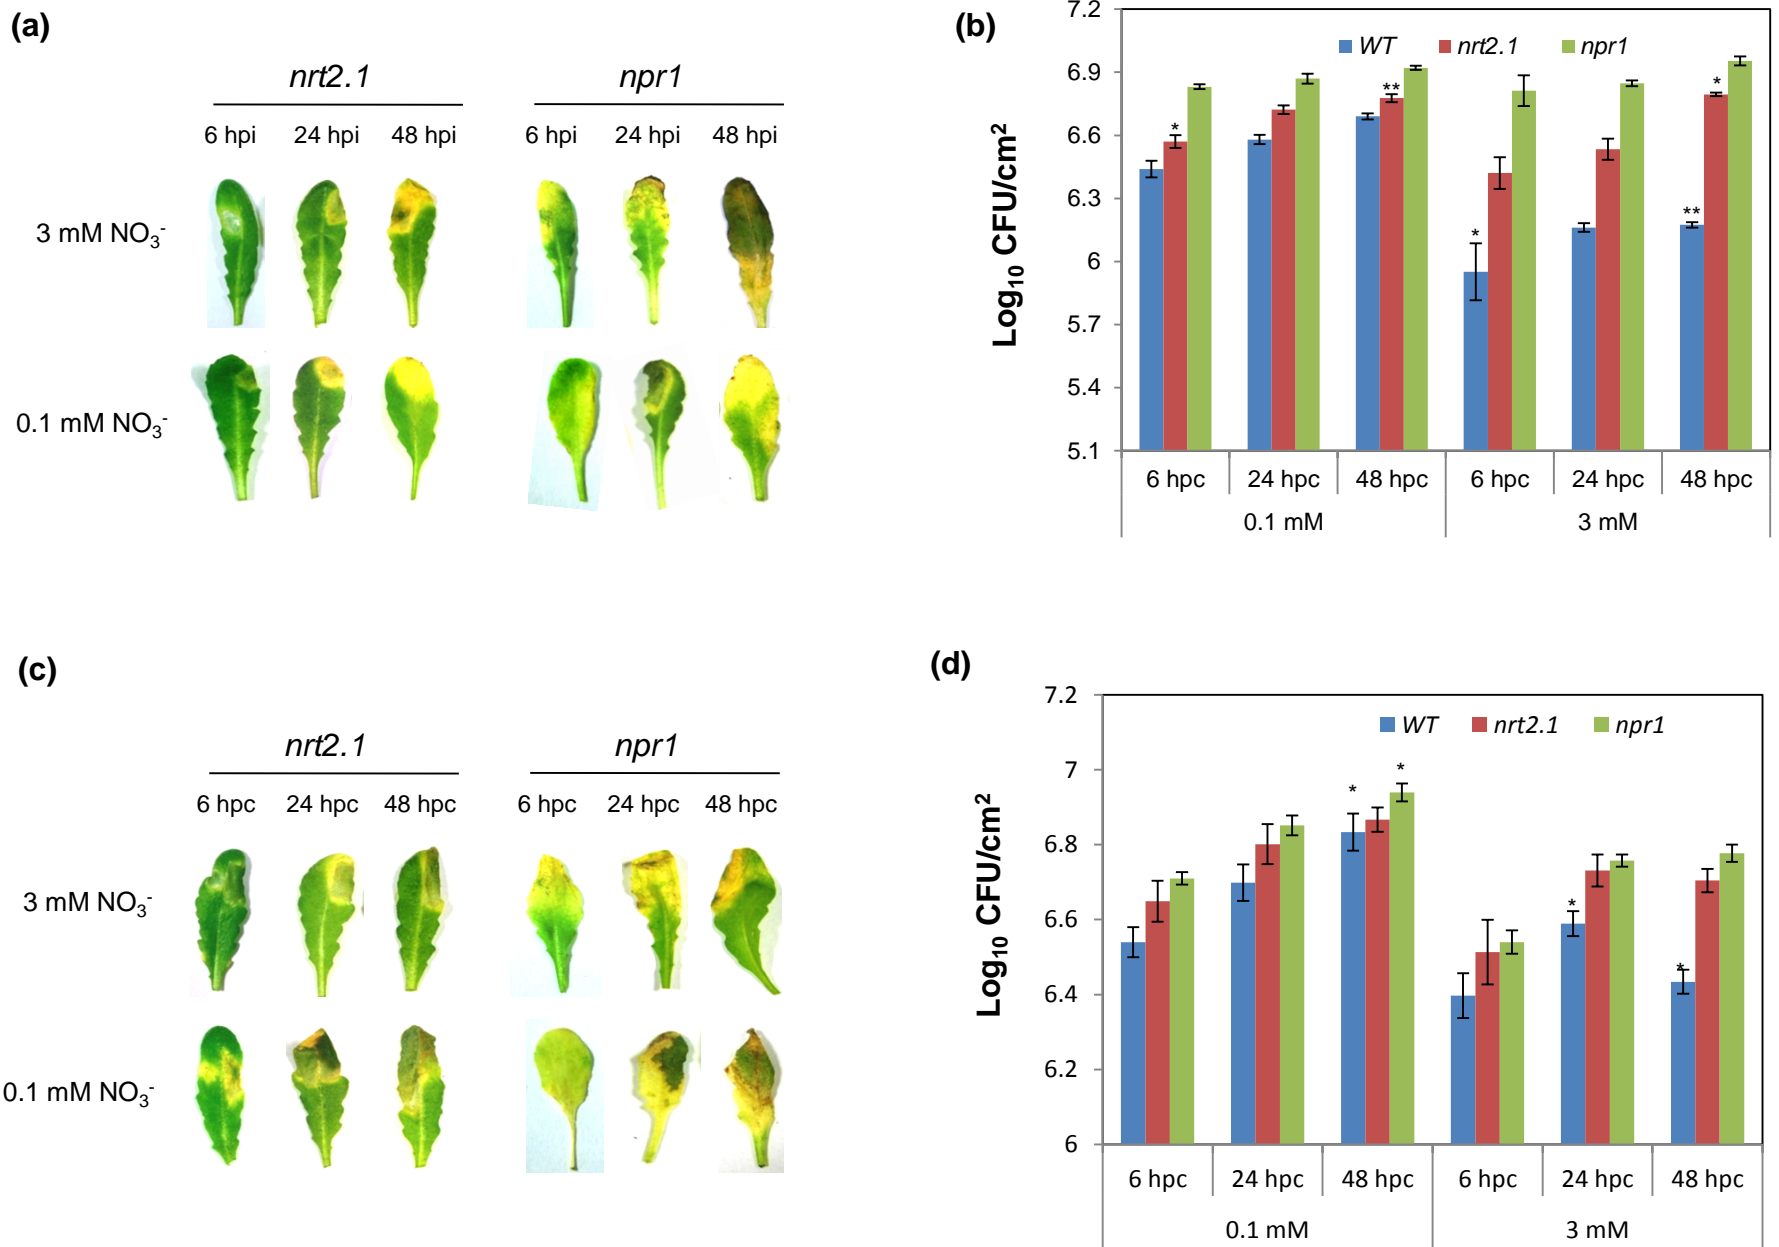

**Fig. 14**

**(a)**

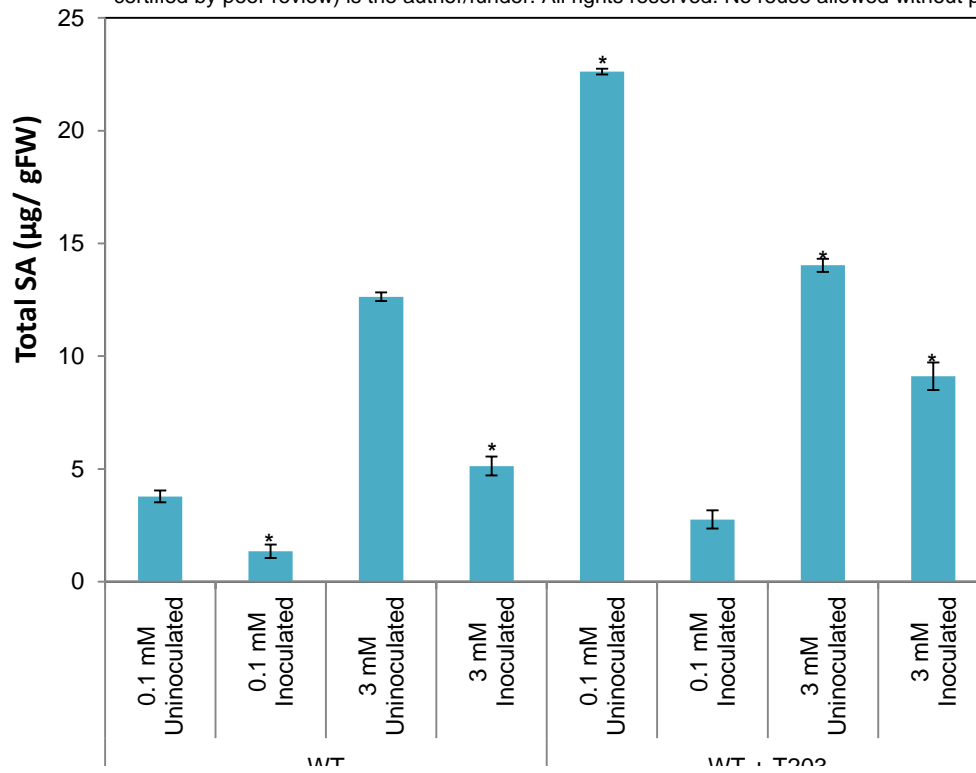

**(b)**

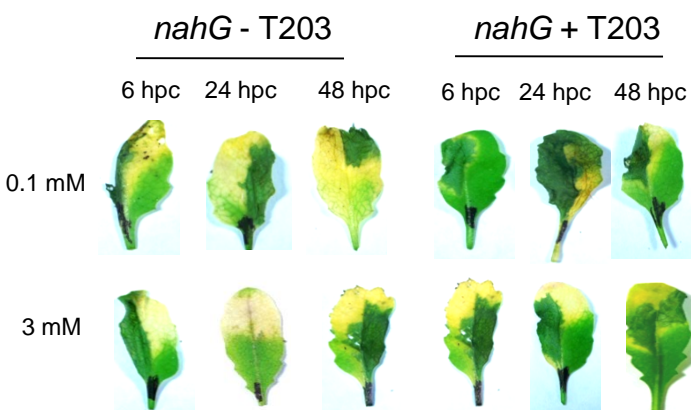

**(c)**

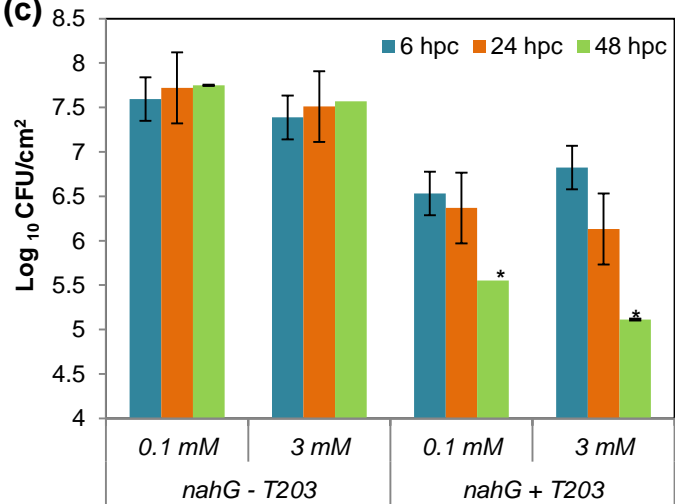

**(d)**

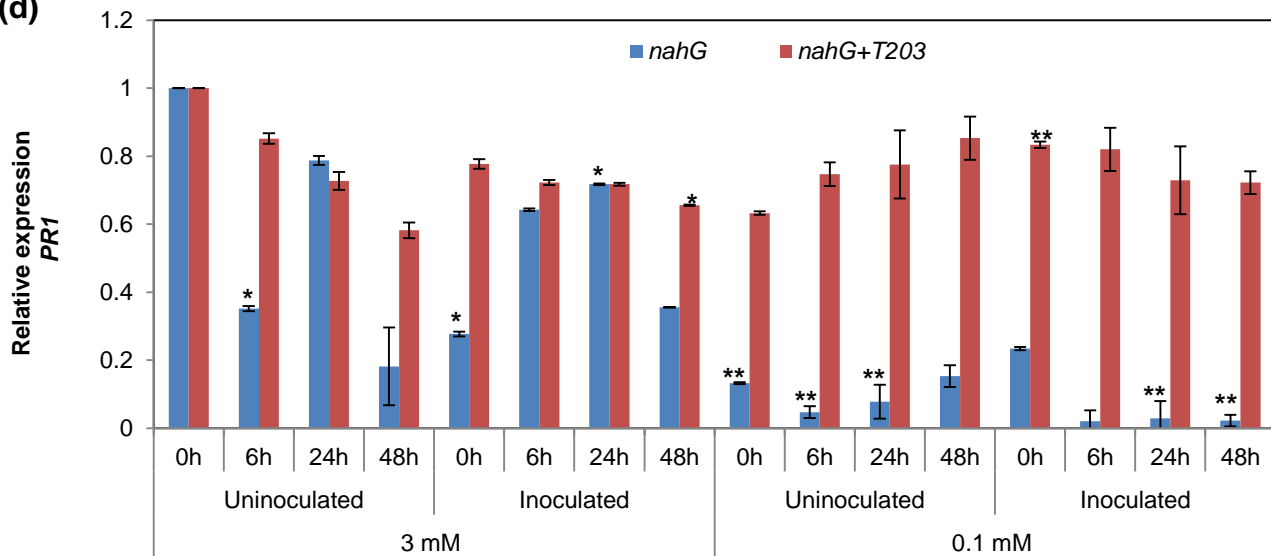

Fig 15

a

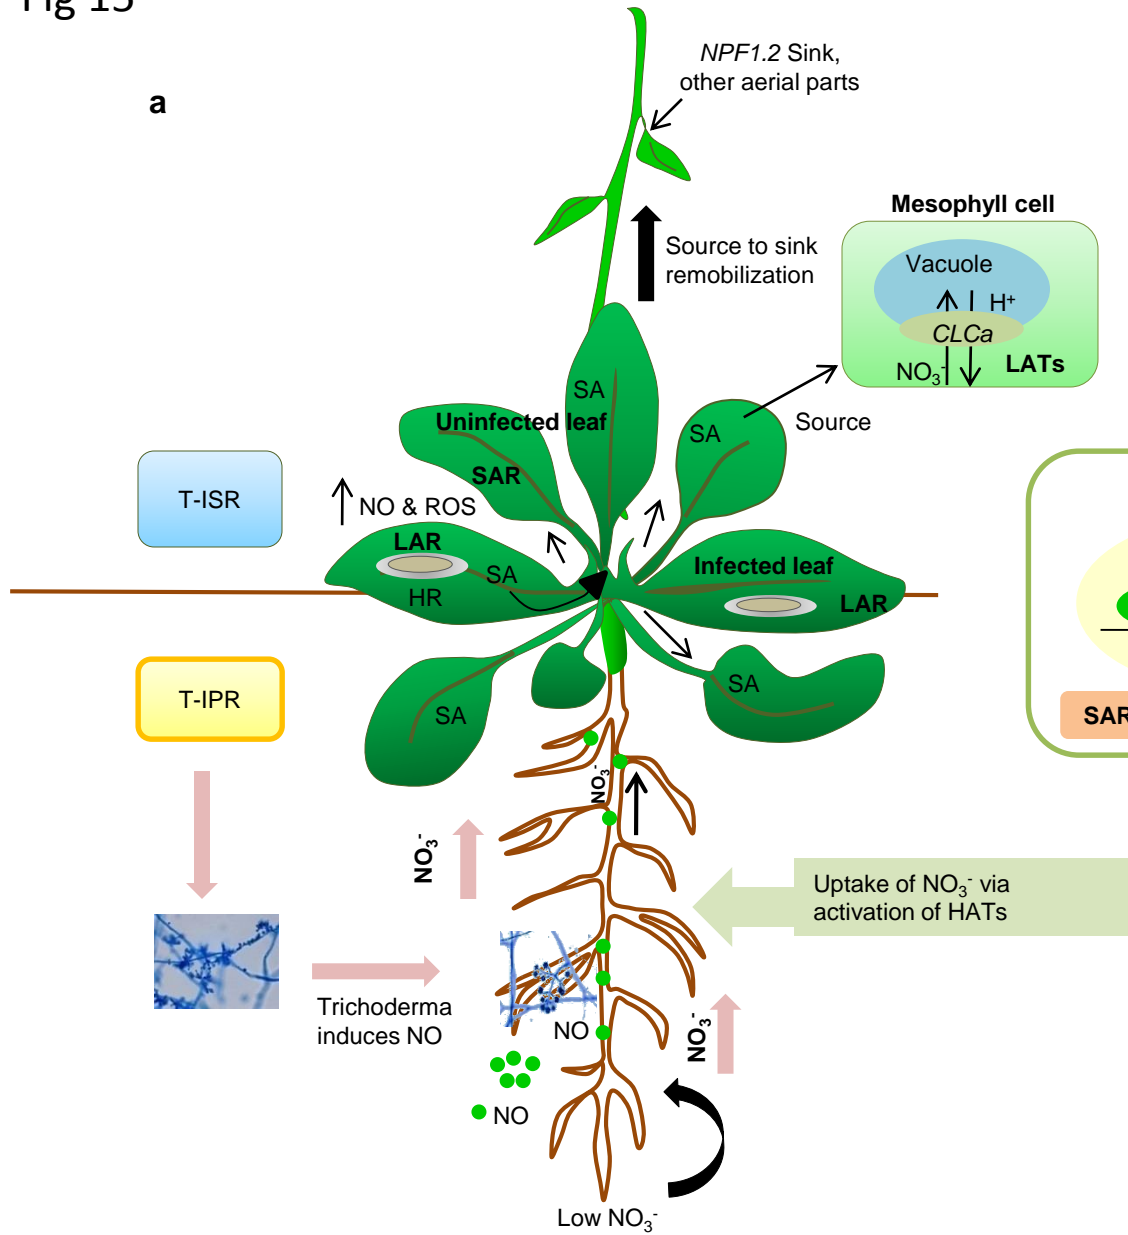

b

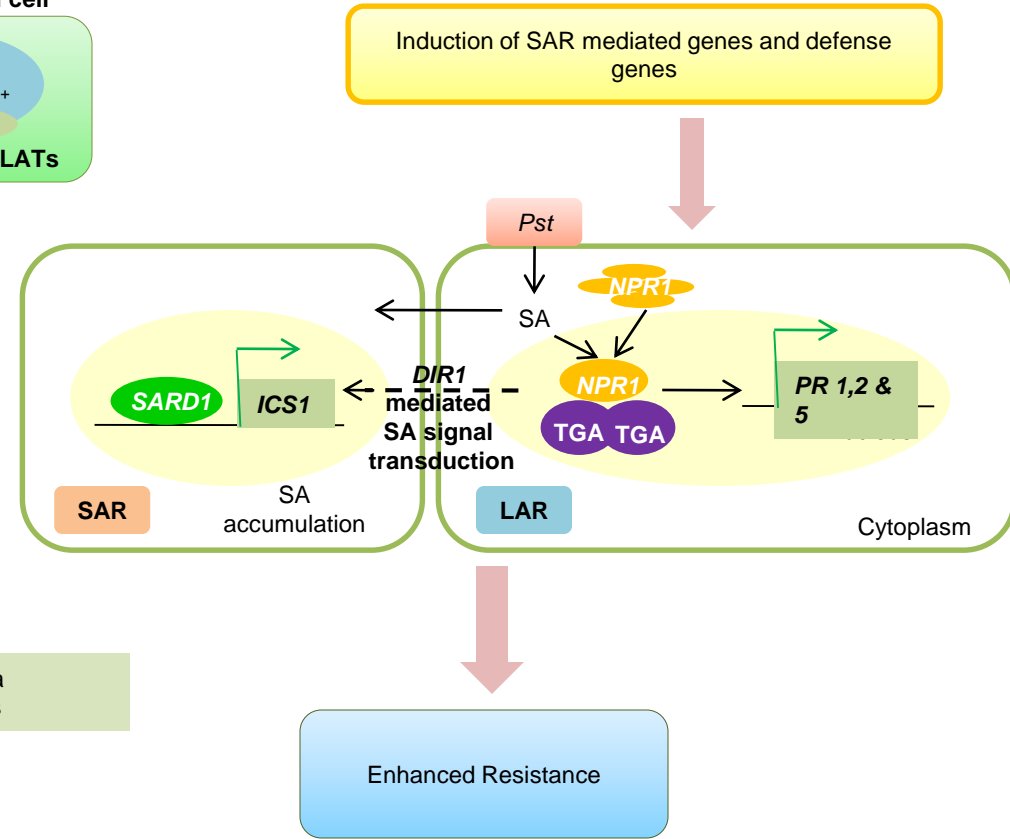

Source: https://www.biorxiv.org/content/10.1101/502492v2.full.pdf
