1 ***Trichoderma asperelloides* enhances local and systemic**  
2 **acquired resistance response under low nitrate nutrition**  
3 **in Arabidopsis**

4 Aakanksha Wany<sup>1</sup>, Pradeep K. Pathak<sup>1</sup>, Alisdair R Fernie<sup>2</sup> Kapuganti Jagadis  
5 Gupta<sup>1</sup> \*

6 <sup>1</sup>National Institute of Plant Genome Research, Aruna Asaf Ali Marg, 110067, New  
7 Delhi, India

8 <sup>2</sup>Max-Planck-Institute of Molecular Plant Physiology, Am Mühlenberg 1,  
9 Potsdam-Golm, D-14476 Germany

10

11 **Correspondence**

12 \*Kapuganti Jagadis Gupta

13 Phone: +91-11-26735111

14 Email: [jgk@nipgr.ac.in](mailto:jgk@nipgr.ac.in)

15

16

17 **Author contribution**

18 KJG supervised, designed the project and wrote the manuscript with help from ARF.

19 AW designed, performed experiments and analyzed whole data. PKP performed  
20 experiments.

21 **One-sentence summary:** *Trichoderma* enhances local and systemic acquired  
22 resistance under low nitrate nutrition

23

24

25

26

27

28 **Abstract**

29 Nitrogen (N) is essential for growth, development and defense but, how low N affects  
30 defense and the role of *Trichoderma* in enhancing defense under low nitrate is not  
31 known. Low nitrate fed *Arabidopsis* plants displayed reduced growth and  
32 compromised local and systemic acquired resistance responses when infected with  
33 both avirulent and virulent *Pseudomonas syringae* DC3000. These responses were  
34 enhanced in the presence of *Trichoderma*. The mechanism of increased local and  
35 systemic acquired resistance mediated by *Trichoderma* involved increased N uptake  
36 and enhanced protein levels via modulation of nitrate transporter genes. The *nrt2.1*  
37 mutant is compromised in local and systemic acquired resistance responses  
38 suggesting a link between enhanced N transport and defense. Enhanced N uptake  
39 was mediated by *Trichoderma* elicited nitric oxide (NO). Low NO producing *nia1,2*  
40 mutant and *nsHb<sup>+</sup>* over expressing lines were unable to induce nitrate transporters  
41 and thereby compromised defense in the presence of *Trichoderma* under low N  
42 suggesting a signaling role of *Trichoderma* elicited NO. *Trichoderma* also induced  
43 SA and defense gene expression under low N. The SA deficient *NahG* transgenic  
44 line and the *npr1* mutant were also compromised in *Trichoderma*-mediated local and  
45 systemic acquired resistance responses. Collectively our results indicated that the  
46 mechanism of enhanced plant defense under low N mediated by *Trichoderma*  
47 involves NO, ROS, SA production as well as the induction of NRT and marker genes  
48 for systemic acquired resistance.

49

50

51

52

53

54 **Key words:** Nitric oxide, nitrate transporters, *Pseudomonas syringae*, SAR,  
55 *Trichoderma*

56

57

58

59

## 60 **Introduction**

61 Nitrogen (N) is essential for growth and development of plants. It is a crucial  
62 component in chlorophyll, nucleic acids and amino acids as well as a large number  
63 of specialized metabolites. N, furthermore, plays an important role in the regulation  
64 of primary and secondary metabolism and also in protection of plants against biotic  
65 and abiotic stresses since it triggers defense response against stresses (O'Brien *et al.*  
66 *2016*; Mur *et al.* *2017*). N deficiency occurs in soil due to slow mineralization, lack  
67 of sufficient organic matter, leaching due to heavy rainfalls and increased activities of  
68 denitrifying bacteria. Low N can retard plant growth and cause severe physiological  
69 and morphological defects (Walker *et al.* *2001*; Landrein *et al.* *2018*). To cope with  
70 this, plants have evolved N uptake systems that support their survival under N  
71 deficiency (Li *et al.* *2017*). These uptake systems are based on their affinity with  
72 transport of nitrates (NO<sub>3</sub><sup>-</sup>), being mediated by the low and high affinity nitrate  
73 transporter protein families (LATs & HATs; Tsay *et al.* *2007*).

74 N plays a very significant role in plant defense against both virulent and  
75 avirulent pathogens (Dietrich *et al.* *2004*; Gupta *et al.* *2013*; Mur *et al.* *2017*). Hence,  
76 operation of an efficient N transport system can help plants to obtain sufficient  
77 nitrogen to defend themselves against bacterial pathogens. These defense  
78 responses involve activation of innate immune response comprising of pathogen-  
79 triggered immunity (PTI and effector-triggered immunity (ETI) (Alves *et al.* *2014*;  
80 Jones and Dangl *2006*) and require N. One of the defense mechanisms against  
81 invading pathogen importantly includes rapid programmed cell death known as the  
82 hypersensitive response (HR), which develops during incompatible plant-pathogen  
83 (*R-avr*) interactions (Delledonne *et al.* *1998*). An early characteristic of HR is the  
84 rapid generation of superoxide (O<sub>2</sub><sup>-</sup>), nitric oxide (NO) and the accumulation of H<sub>2</sub>O<sub>2</sub>  
85 (Lamb and Dixon, *1997*). Moreover, SA produced during HR, plays an important role  
86 in plant defense (Mur *et al.* *2000, 2008*; Gupta *et al.* *2013*). The host mobilizes  
87 salicylic acid (SA) for plant defense (Oliva and Quibod *2017*, Mur *et al.* *2017*) and  
88 this pathway itself requires N for synthesis of various intermediates leading to SA  
89 production. Thus, N not only improves the nutritional status of the plant, but, also it  
90 also plays a more direct role in defense. Moreover, the form of N nutrition can greatly  
91 influence the HR-mediated resistance in plants (Gupta *et al.* *2013*).

92 Nitrate ( $\text{NO}_3^-$ ) nutrition greatly influences HR via the production of NO which is  
93 a regulatory signal in plant defense (Delledonne *et al.* 1998). NO production depends  
94 on  $\text{NO}_3^-$  or L-Arginine (Planchet *et al.* 2005, Astier *et al.* 2018) As such, N deficiency  
95 can also lead to reduced levels of NO. Moreover, SA is known to be induced by NO,  
96 hence, low  $\text{NO}_3^-$  leads both to low NO and reduced SA levels. Since NO production  
97 also requires  $\text{NO}_3^-$ , it may also play a role in local acquired resistance (LAR) where  
98 resistance is developed at the site of infection and also in systemic acquired  
99 resistance (SAR) which results in broad-spectrum disease resistance against  
100 secondary infections following the primary infection (Cameron *et al.* 1994, 1999).  
101 SAR develops either as a consequence of HR where NO has a proven role  
102 (Delledonne *et al.* 1998). SAR is dependent on SA or its derivatives (Park *et al.*  
103 2007, Metraux *et al.* 1990) as well as pathogen responsive (*PR*) gene expression  
104 (Ryals *et al.* 1996). It was previously shown that NO plays a role in nitrate  
105 uptake/assimilation during stress by modulation of the expression of nitrate  
106 transporters (Frungillo *et al.* 2013). Thus, N plays likely plays multifaceted roles in  
107 plant defense. Indeed, whilst it has been shown that a very high levels of N can  
108 increase susceptibility to pathogen infection (Fagard *et al.* 2014) a low level of N can  
109 also increase susceptibility (Dietrich *et al.* 2004). For this reason we set out to test  
110 whether increasing N uptake can assist in plant defense under low  $\text{NO}_3^-$ . Many plant  
111 symbiotic microbes such as mycorrhiza, *Trichoderma* and plant growth promoting  
112 rhizobia are known to increase nutrient uptake. However, the operation of plant  
113 defense under low N and the effect of these microbes in increasing plant defense  
114 under N deficiency is currently unknown.

115 Several species of *Trichoderma* play an important role in plant growth  
116 promotion and resistance against various biotic and abiotic stresses. They confer  
117 resistance to plants via various mechanisms such as mycoparasitism, activation of  
118 basal and induced systemic resistance (ISR) responses (Brotman *et al.* 2012). Upon  
119 pathogen attack, *Trichoderma* treated plants show both elevated elevated  
120 phenylalanine ammonia-lyase (*PAL*) transcript levels (Yedidia *et al.* 2003) and  
121 increased levels of defense-related plant enzymes (Shoresh *et al.* 2005).

122 If *Trichoderma* enhances N uptake, it could be anticipated to have positive  
123 effects on plant defense via both LAR and SAR responses. So far is it not known  
124 whether *Trichoderma* can increase plant defense under low N. Therefore, in the

125 present study, we have assessed, the systemic defense response of low N fed  
126 *Arabidopsis thaliana* plants to the phytopathogen; *Pseudomonas syringae* p.v.  
127 tomato DC3000 induced by the beneficial fungus *Trichoderma asperelloides* (T203)  
128 under low and optimum nitrate concentrations. Here, we describe that *Trichoderma*  
129 enhances the SAR response in *Arabidopsis* grown under low N by enhancing NO<sub>3</sub><sup>-</sup>  
130 uptake via enhancing nitrate transporter expression with this mechanism involving  
131 both NO and SA.

## 132 **Results**

### 133 **Low nitrogen compromises LAR response and *Trichoderma* enhances LAR** 134 **under low N condition**

135 Nitrogen plays an important role in plant defense, hence, we first tested the  
136 effect of low nitrate on the LAR response. For this purpose, WT plants were grown  
137 under high (3 mM) and low (0.1 mM) NO<sub>3</sub><sup>-</sup> conditions and infected with avirulent *P.*  
138 *syringae* DC3000 (*avrRpm1*) and the local HR response was observed (Fig. **1a**, Fig.  
139 **S3b**). As shown in Fig. **1a-WT panel**, the 3 mM NO<sub>3</sub><sup>-</sup>-fed *Pst* infiltrated plants showed  
140 HR at the inoculation sites at 24 and 48 hours post infection (hpi) whereas plants  
141 grown in the presence of 0.1 mM NO<sub>3</sub><sup>-</sup> plants displayed chlorotic lesions at the site of  
142 inoculation at 24 and 48 hpi. We next studied the effect of *Trichoderma* on the LAR  
143 response Surprisingly, 0.1 mM NO<sub>3</sub><sup>-</sup> grown WT plants in the presence of  
144 *Trichoderma* did not show any severe disease symptoms, rather they mimicked the  
145 HR phenotype of 3 mM NO<sub>3</sub><sup>-</sup> grown plants and displayed resistance (Fig. **1a-WT+T**  
146 **panel**). Interestingly, we also found that under 0.1 mM NO<sub>3</sub><sup>-</sup>, *Trichoderma* treated  
147 plants displayed an enhanced growth phenotype compared to plants in the absence  
148 of *Trichoderma* (Fig. **S1a**), this enhanced growth was linked to an increased leaf  
149 number, leaf fresh weight and total chlorophyll content (Fig. **S2 b, c, d**). These  
150 results suggest that *Trichoderma* provides resistance under low N stress.  
151 Furthermore, HR was evidenced in electrolyte leakage (EL) assays where higher  
152 and more rapid leakage was recorded in the presence of *Trichoderma* irrespective of  
153 the concentration of nitrate supplied (Fig. **1b**) with these results being in close  
154 accordance with the observed HR response.

155 A significant increase in the colony forming unit (CFU) count during LAR was  
156 observed in 0.1 mM WT plants supplied with 0.1 mM nitrate was observed in

157 comparison to the bacterial numbers of the same plants grown in the presence of  
158 *Trichoderma* (Fig. **1c**). We further found that, *PR1* (a marker for HR) transcript levels  
159 increased in *Pst* treated plants grown in the presence of either 0.1 mM (~9 fold at 48  
160 hpi) or 3 mM (~28 folds at 48 hpi)  $\text{NO}_3^-$  in the presence of *Trichoderma* grown in  
161 comparison to WT plants grown on 0.1 mM  $\text{NO}_3^-$  and in the absence of  
162 *Trichoderma*, where expression of this gene remained unaltered at 48 hpi (Fig. **1d**).  
163 Collectively these data thus suggest that *Trichoderma asperelloides* plays a role in  
164 improving the LAR response under low  $\text{NO}_3^-$  availability.

### 165 ***Trichoderma* can induce the SAR response under low N**

166 Having characterized LAR responses, we next studied responses SAR by  
167 infecting the secondary leaves with virulent *Pst* DC3000 (Fig. **S1b**; Cameron *et al.*  
168 1994 and 1999). Three days post-secondary challenge with virulent *Pst* DC3000, EL,  
169 CFU and *PR1* gene expression were assessed (Fig. S3c). During this SAR assay  
170 *Pst*-challenged WT plants grown on 0.1 mM  $\text{NO}_3^-$  showed more prominent necrotic  
171 and dark yellow lesions that spread to both sides of the leaf than *Pst*-challenged WT  
172 plants grown on 3 mM  $\text{NO}_3^-$ . This suggests that, the plants grown on 3 mM  $\text{NO}_3^-$  had  
173 stronger defenses during secondary challenge than the plants grown on 0.1 mM  
174  $\text{NO}_3^-$  suggesting that sufficient N is required for SAR development. In the presence  
175 of *Trichoderma* there was significant reduction of yellowing in the 0.1 mM  $\text{NO}_3^-$  plants  
176 in comparison to plants in which *Trichoderma* was absent (Compare Fig. **2a-WT+T**  
177 **panel** with **WT panel**).

178 Trypan blue images of inoculated and distal leaves are shown in Fig. **2b** and  
179 **Fig. S5b**. In response to *Trichoderma*, plants grown on 0.1 mM  $\text{NO}_3^-$  showed more  
180 trypan blue spots during secondary challenge. Upon infection, cell death spots were  
181 more widely spread in these leaves (compare Fig. **2b WT+T panel** with **WT panel**).  
182 At 48 hpc, there was an increased cell death in inoculated WT leaves grown both on  
183 0.1 and 3 mM  $\text{NO}_3^-$  but the cell death phenotype differs. The distal leaves plants in  
184 the presence of *Trichoderma*, showed a uniform spread of microbursts throughout  
185 the leaf blades, at all the time points but with the plants grown on 3 mM  $\text{NO}_3^-$   
186 displaying slightly larger microbursts than those grown on 0.1 mM  $\text{NO}_3^-$  (Fig. **2b**).  
187 The presence of these microbursts suggests that during SAR establishment the

188 mobile signal perceived by the distal leaves results in the occurrence of low  
189 frequency microscopic HRs (Cameron *et al.* 1999; Alvarez *et al.* 1998).

190 We next investigated electrolyte leakage during SAR. Mock inoculated plants  
191 showed moderate EL in plants grown on either 0.1 mM or 3 mM NO<sub>3</sub><sup>-</sup> (Fig. **S2a**). EL  
192 was, however, significantly higher (~4 fold) in both 0.1 and 3 mM NO<sub>3</sub><sup>-</sup> grown plants  
193 treated with *Trichoderma* during secondary challenge, in comparison to 0.1 mM  
194 nitrate grown plants in the absence of *Trichoderma* at 24 and 48 hpc (Fig. **2c**). This  
195 suggests that *Trichoderma* treatment primes the defense responses in the leaves.  
196 EL data of distal leaves during SAR is also shown in Fig. **S5a**.

197 Bacterial count in terms of Log CFU (Fig. **2d**) revealed that, the *Pst* population  
198 significantly decreased in *Trichoderma* treated low N-fed plants, suggesting that  
199 *Trichoderma* imparts enhanced systemic resistance to the NO<sub>3</sub><sup>-</sup> stressed plants.

#### 200 ***Trichoderma* activates nitrate transporters, facilitates N uptake and promotes** 201 **SAR in low N-fed plants**

202 Increased LAR and SAR responses under low NO<sub>3</sub><sup>-</sup> in the presence of  
203 *Trichoderma* are probably due to an increased nutrient uptake as these responses  
204 were all absent in the absence of *Trichoderma*. We, therefore, checked the NO<sub>3</sub><sup>-</sup>  
205 levels in the leaves of 0.1 mM and 3 mM NO<sub>3</sub><sup>-</sup> grown WT plants in the presence and  
206 absence of *Trichoderma* and represented it as percent nitrate uptake up to Day 15  
207 in leaves (Fig. 3a). The experimental design and protocol for measuring NO<sub>3</sub><sup>-</sup> levels  
208 and uptake in leaves is demonstrated in Fig. **S4a, b** and **d**. It was observed that %  
209 nitrate uptake was significantly increased in the presence of *Trichoderma* in  
210 comparison to in the absence of *Trichoderma* enhancing the nitrate uptake of 0.1  
211 mM NO<sub>3</sub><sup>-</sup> fed WT plants by 17%. The basal levels of NO<sub>3</sub><sup>-</sup> present in the soilrite:  
212 agropeat mixture is also shown in Fig **S4c**. This increased NO<sub>3</sub><sup>-</sup> transport is probably  
213 the reason for resistance hence, we next checked the expression of both LATs  
214 chloride channel *CLC-A*), *NRT1/ PTR* family 1.2 (*NPF1.2*) and high affinity nitrate  
215 transporters (HATs; *NRT2.1*, *NRT2.2* and *NRT2.4*).

216 *CLCA* is a tonoplast located antiporter channel system which drives NO<sub>3</sub><sup>-</sup>  
217 accumulation in the vacuoles (Krapp *et al.* 2014). It was observed that, under low  
218 NO<sub>3</sub><sup>-</sup>, *CLCA* is less inducible in *Pst* treated plants whereas it was significantly  
219 upregulated in 0.1 mM NO<sub>3</sub><sup>-</sup> grown, *Pst* treated plants in the presence of



220 *Trichoderma* ( Fig. 3b). We further checked the expression of *NPF1.2*; (Fig. 3c)  
221 which is involved in the transfer of xylem-borne nitrate to the phloem in the petiole  
222 (Krapp *et al.* 2014). It was found that, in *Pst* treated 3 mM NO<sub>3</sub><sup>-</sup> grown WT plants,  
223 *NPF1.2* levels were highly induced till 48 hpc, in comparison to 0.1 mM *Pst*  
224 inoculated leaves (Fig. 3c). This might be the reason behind the resistance of 3 mM  
225 plants and susceptibility of 0.1 mM plants following pathogen challenge. However,  
226 upon *Trichoderma* pre-treatment, *NPF1.2* transcript levels in *Pst*-inoculated 0.1 mM  
227 NO<sub>3</sub><sup>-</sup> grown plants, showed significant induction in comparison to same treatment in  
228 the absence of *Trichoderma*. This suggests that, *Trichoderma* may cause the  
229 regulation of *NPF1.2*.

230 *NRT2* transporters (*NRT2.1*, *NRT2.2* and *NRT2.4*) are HATS which become  
231 activated at low N concentrations (<1 mM). Previously, it was shown that *NRT2.1* is  
232 active only under conditions of N starvation (Dechorgnat *et al.* 2012). Under low NO<sub>3</sub><sup>-</sup>  
233 conditions, *NRT2.1* was significantly induced in all treatments in the presence of  
234 *Trichoderma* in *Pst*- treated plants in comparison to plant in the absence of  
235 *Trichoderma* where there was already an induction of this gene at early time points  
236 (Fig. 4a). The SAR establishment stage represented by non-inoculated leaves  
237 (distal) showed dynamic and elevated up-regulation of *NRT2.1* transcripts (Fig. 4a).  
238 This revealed that, *Trichoderma* colonization benefits the plant by facilitating the N  
239 supply even under low NO<sub>3</sub><sup>-</sup> conditions thereby improving plant defense via the  
240 mediation of SAR. *NRT2.2* expression levels have increased several folds in 0.1 mM  
241 distal and inoculated leaves of *Trichoderma* grown plants (Fig. 4b & 6b)). This again  
242 suggests that faster N uptake by *Trichoderma* treated plants grown on low NO<sub>3</sub><sup>-</sup> can  
243 aid in *Pst* defense. We next checked *NRT2.4* expression levels across the  
244 treatments. This gene showed early induction (6 h) in 0.1 mM *Pst* treated in  
245 inoculated and distal leaves (Fig. 4c) and the early induction was similar in  
246 *Trichoderma* treatment.

247 Taken together, these data suggest that *Trichoderma* induces HATs (*NRT 2.1*  
248 and *NRT 2.2*) to facilitate N uptake under low NO<sub>3</sub><sup>-</sup> conditions. To confirm the role of  
249 HATs in increasing plant defense via N uptake, we checked the *PR1* expression in  
250 WT and *nrt2.1* mutants. The expression of *PR1* gene in *Trichoderma* inoculated  
251 plants increased 12-13 folds in 24 h but in the case of *nrt2.1* mutant (Fig. 4d), it was  
252 not at all induced suggesting that *NRT2.1* plays an important role in increasing plant



253 defense under low N mediated by *Trichoderma*. We subsequently found that the  
254 expression of the *NRT2.2* gene was also suppressed in the *nrt2.1* mutant, both in  
255 and the presence and absence of *Trichoderma* (Fig. 4e) suggesting that *NRT2.1* is  
256 mainly responsible for increasing N uptake under low  $\text{NO}_3^-$  facilitated by  
257 *Trichoderma*. We next checked the protein levels in WT and the *nrt2.1* mutant in the  
258 presence or absence of *Trichoderma* under low  $\text{NO}_3^-$  nutrition. In response to  
259 *Trichoderma*, protein levels were increased in the WT. In the *nrt2.1* mutant protein  
260 levels were lower than in WT and upon *Trichoderma* treatment only a slight increase  
261 in their levels was observed (Fig. 4f). These results suggest that *Trichoderma*  
262 application can increase  $\text{NO}_3^-$  transport.

### 263 ***Trichoderma* elicits NO production during early stages of inoculation which is** 264 **required for induction of HATs and *PR* gene expression**

265 Previously, it was shown that *Trichoderma* elicits NO at early stages (Gupta *et*  
266 *al.* 2014). This elicitation could subsequently play a role in the induction of  $\text{NO}_3^-$   
267 transporter genes. Hence, we checked NO production in WT, *nia1,2* mutants and  
268 WT seedlings inoculated with *Trichoderma* and grown on the NO scavenger cPTIO.  
269 Control roots in 0.1 and 3 mM  $\text{NO}_3^-$  produced reduced levels of NO. Within 2 min of  
270 *Trichoderma* application, WT plants displayed highly increased levels of NO in both  
271 0.1 mM and 3 mM  $\text{NO}_3^-$  (Fig. 5) but the increase was slightly higher in 0.1 mM than 3  
272 mM. That said, after 10 minutes and 24 h of *Trichoderma* incubation, the WT plants  
273 showed extremely low fluorescence (Fig. 5). This suggests *Trichoderma* greatly  
274 induces NO in low  $\text{NO}_3^-$  grown plants within a short time period. Thus, *Trichoderma*  
275 induced NO production likely plays a role in priming and induction of HATs.  
276 Assessment of NO in the *nia1,2* mutant revealed that nitrate reductase (NR) is  
277 responsible for the *Trichoderma*-induced NO production. Whilst plants grown in the  
278 presence of cPTIO displayed reduced levels of NO. We further checked the  
279 importance of *Trichoderma*-elicited NO production in the induction of HATs (*NRT 2.1*  
280 & 2.2), total protein levels and expression of the *PR1* gene in low NO producing non-  
281 symbiotic hemoglobin over-expressing line (*nsHb<sup>+</sup>*), *nia1,2* and *nrt2.1* mutants.  
282 Expression of *NRT2.1* and 2.2 levels increased in WT in response to *Trichoderma*,  
283 whereas in *Hb<sup>+</sup>* lines, *nia1,2* and *nrt2.1* mutants these two HATs were not induced  
284 (Fig. 6a,b) suggesting that *Trichoderma* elicited NO is responsible for induction of  
285 HATs. Further, reduced protein levels were observed in *nia1,2* and *Hb<sup>+</sup>* plants

286 suggesting that the induction of  $\text{NO}_3^-$  transporters mediated by *Trichoderma* elicited  
287 NO plays a role in increased N uptake under low  $\text{NO}_3^-$  (Fig. 6c). Furthermore, we  
288 found that *nia1,2* and  $\text{Hb}^+$  were unable to induce *PR1* expression under these  
289 conditions (Fig. 6d). Taken together, these results suggest that *Trichoderma* elicited  
290 NO plays a role in overall increase in defense response under low  $\text{NO}_3^-$ .

291 We next investigated the role of NO in LAR and SAR development in the  
292 presence of *Trichoderma* using NO mutants. Under low  $\text{NO}_3^-$ , WT plants displayed a  
293 stronger LAR response than either the  $\text{Hb}^+$  lines or the *nia1,2* mutant. Furthermore,  
294 reduced bacterial growth and increased *PR1* gene expression was observed in WT  
295 compared to either the  $\text{Hb}^+$  lines or the *nia1,2* mutant (Fig. 7 a,b,c). Similarly, the  
296 SAR response was also more compromised in the WT than in the  $\text{Hb}^+$  lines and the  
297 *nia1,2* mutant ((Fig. 7 d,e,f). As for LAR, a similarly reduced bacterial number and  
298 increased *PR1* gene expression was observed in WT in comparison to the  $\text{Hb}^+$  lines  
299 and the *nia1,2* mutant

300

### 301 **ROS is a component of the *Trichoderma*-induced increased resistance via SAR**

302 Both NO and ROS are involved in the plant resistance response hence we  
303 next investigated the role of ROS. The distal leaves of 0.1 mM  $\text{NO}_3^-$  grown WT plants  
304 in the presence of *Trichoderma* showed increased  $\text{H}_2\text{O}_2$  production in comparison to  
305 0.1 mM  $\text{NO}_3^-$  grown distal leaves (Fig. 8a). Also, the level of  $\text{H}_2\text{O}_2$  was more in 3 mM  
306  $\text{NO}_3^-$  grown distal leaves of WT plants in the presence of *Trichoderma* in comparison  
307 to untreated plants (Fig. 8a). This is probably due to the suppression of catalase  
308 activity by SA. This suggests that *Trichoderma* inoculation can enhance  $\text{H}_2\text{O}_2$  levels  
309 in distal leaves during SAR, whereas, both the *Pst* inoculated leaves from WT grown  
310 under 3 mM  $\text{NO}_3^-$  and WT plants in the presence of *Trichoderma* displayed higher  
311  $\text{H}_2\text{O}_2$  production (Fig. 8a). This clearly suggests that *Trichoderma* plays a role in  
312 inducing  $\text{H}_2\text{O}_2$  in low  $\text{NO}_3^-$  fed WT plants during SAR.

313  $\text{O}_2^-$  is a key player in cell death (Fig. 8b). It was observed that, there was  
314 increased  $\text{O}_2^-$  in inoculated leaves of both 0.1 and 3 mM  $\text{NO}_3^-$  fed WT and  
315 *Trichoderma* treated WT plants, but the increase was much higher in the presence  
316 than in the absence of *Trichoderma*. This suggests that there was a rapid oxidative  
317 burst (HR) which offers resistance to the plants in response to *Trichoderma*  
318 treatment. Taken together, the coordinated interplay of  $\text{H}_2\text{O}_2$ ,  $\text{O}_2^-$  and NO leads to

319 the HR associated cell death that greatly improves the LAR and SAR responses of  
320 low N-stress plants.

321

### 322 ***Trichoderma* induces defense genes during SAR in low N-fed plants**

323 We next checked the expression levels of defense related genes (*PAL1*, *PR1*,  
324 *PR2* and *PR5*) during SAR. In both 0.1 mM and 3 mM  $\text{NO}_3^-$  grown, *Pst* inoculated  
325 WT plants, *PAL1* transcripts were highly induced in all time points, but, the distal  
326 leaves showed *PAL1* induction only until 6 hpc, and this dramatically declined at later  
327 time points (Fig. **9a**). In the presence of *Trichoderma* WT plants grown under 0.1 mM  
328 and 3 mM  $\text{NO}_3^-$  regimes, showed even greater enhancements in the levels of *PAL1*  
329 transcripts ) in inoculated as well as distal leaves until 48 hpc. A similar trend was  
330 observed in the *PR1* (Fig. **9b**), *PR2* (Fig. **9c**) and *PR5* (Fig. **9d**) expression profiles,  
331 which displayed elevation following *Trichoderma* application. Of the four defense  
332 genes examined, the *PR1* gene displayed the highest expression levels in plants  
333 grown in the presence of *Trichoderma* suggesting that *Trichoderma* might induce SA  
334 levels to a greater extent during SAR.

### 335 ***Trichoderma* enhances expression of SAR-mediated regulatory genes**

336 Having established the link between *Trichoderma* and SAR we next checked  
337 whether *Trichoderma* can induce the SAR response via induction of regulatory  
338 genes such as *DIR1*, *NPR1*, *SARD1* and *TGA3*. The lipid transfer protein,  
339 DEFECTIVE IN INDUCED RESISTANCE1 (*DIR1*) is a key mobile component of  
340 SAR response (Maldonado *et al.* 2002) involved in long-distance translocation from  
341 local to distant leaves (Carella *et al.* 2015, Champigny *et al.* 2013). It was found that,  
342 *DIR1* induction took place only in the initial time points in inoculated and distal leaves  
343 of both 0.1 and 3 mM  $\text{NO}_3^-$  grown plants (Fig. **10a**). However, in the presence of  
344 *Trichoderma*, a slightly increased *DIR1* expression was observed at all time points  
345 (Fig. **10a**). Upon perception of SAR mobile signals, *Non-Expresser of Pathogenesis-*  
346 *Related gene1* (*NPR1*) activates defense in challenged plants (Cao *et al.* 1997). We  
347 found a similar trend in the *NPR1* expression profile as we did for *DIR1* (Fig. **10b**).  
348 Moreover, upon *Trichoderma* treatment, the levels of *NPR1* inoculated and distal  
349 challenged leaves gradually increased in both 0.1 and 3 mM  $\text{NO}_3^-$  grown (Fig. **10b**).  
350 Following this we checked the expression of *SAR DEFICIENT 1* (*SARD1*) a  
351 pathogen-induced transcription factor (Zhang *et al.* 2010) and a key regulator of

352 *Isochorismate Synthase 1 (ICS1)* and SA synthesis (Wang *et al.* 2011). A  
353 remarkably stronger induction of *SARD1* expression levels in *Trichoderma* treated  
354 distal leaves of 0.1 mM NO<sub>3</sub><sup>-</sup> grown plants at 6 hpc (~82 fold) revealed that is a  
355 potential inducer of SA biosynthesis (Fig. **10c**). Another important regulatory gene,  
356 *TGA3*, is an *NPR1*-interacting protein (NIP) as well as a critical component in the SA  
357 signaling mechanism. This gene was induced in all treatments in response to  
358 *Trichoderma* (Fig. **10d**) highlighting the important *Trichoderma*-mediated promotion  
359 of SA signaling pathways.

### 360 ***nrt2.1* and *npr1* mutants are compromised in LAR and SAR responses**

361 Having clearly demonstrate the link between N nutrition and defense we next  
362 decided to characterize LAR in *nrt2.1* and *npr1* mutants in response to virulent  
363 *Pst*DC3000. The 0.1 mM NO<sub>3</sub><sup>-</sup> fed *nrt2.1* and *npr1* mutants developed more severe  
364 symptoms than 0.1 mM NO<sub>3</sub><sup>-</sup>-fed WT plants (Fig. **11a** 0.1 mM panel). An increased  
365 CFU count was observed in 0.1 mM NO<sub>3</sub><sup>-</sup> fed WT and *nrt2.1* and *npr1* mutants at 24  
366 and 48 hpi in comparison to bacterial numbers in 3 mM NO<sub>3</sub><sup>-</sup> grown plants in which  
367 overall bacterial count of WT was less but a significant increase in CFU was  
368 observed in *nrt2.1* and *npr1* mutants (Fig. **11b**). This suggests that optimum NO<sub>3</sub><sup>-</sup>  
369 concentration plays an important role in resistance response towards virulent *Pst*  
370 DC3000.

371 Similarly, we studied the SAR response in the WT, *nrt2.1* and *npr1* plants. 0.1  
372 mM NO<sub>3</sub><sup>-</sup> grown *Pst*-challenged WT plants show more prominent necrotic and  
373 discolored lesions spread to half of the leaf (Fig. **2a**) confirming susceptible  
374 symptoms (yellow specks). On the other hand, the *nrt2.1* and *npr1* mutants showed  
375 even more severe disease symptoms – namely extensive chlorosis and necrosis  
376 (Fig. **11c**) under low NO<sub>3</sub><sup>-</sup> growth conditions. Our results suggest that, 3 mM NO<sub>3</sub><sup>-</sup>  
377 grown plants proved more resilient to secondary challenge than 0.1 mM NO<sub>3</sub><sup>-</sup> grown  
378 plants. Bacterial populations were also increased in the *nrt2.1* and *npr1* mutants (Fig.  
379 **11d**) suggesting that *NRT2.1* and *NPR1* plays an important role in increasing  
380 defense mediated by *Trichoderma*.

### 381 **Salicylic acid pathway is a part of enhanced plant resistance mediated by** 382 ***Trichoderma* under low N**

383 Examination of SA levels revealed that *Trichoderma* presence accelerated  
384 total SA levels in 0.1 mM distal leaves, in comparison to 3 mM distal leaves. There  
385 was significant increase in SA levels observed in inoculated and distal leaves of  
386 *Trichoderma* grown plants, in comparison to SA levels in WT plants (Fig 12a). We  
387 sought to further confirm role of SA in *Trichoderma* increased SAR, hence *nahG*  
388 plants were challenged in the presence or absence of *Trichoderma*. An intense  
389 chlorotic lesion was evident in both 0.1 and 3 mM grown *nahG* plants in response to  
390 challenge inoculation while *Trichoderma* grown *nahG* plants when challenged they  
391 defended much better evidenced by decreased chlorotic lesions and reduced  
392 bacterial numbers (Fig. **12 b,c** ). Surprisingly, *Trichoderma* grown *nahG* plants  
393 showed slightly enhanced *PR1* transcript levels (Fig. **12d**).

## 394 **Discussion**

395 Nitrogen availability and supply can severely impact growth and development  
396 of plants (Walker *et al.* 2001; Landrein *et al.* 2018). N deficiency can cause chlorosis,  
397 which can impact photosynthesis and overall energy demand for growth and defense  
398 with investment in plant resistance-related compounds being drastically constrained  
399 under limiting nitrogen supply (Dietrich *et al.* 2004). This suggest a possibility that  
400 increased N uptake under limited supply might boost defense. Previously it was  
401 shown that N levels have been shown to affect the synthesis of constitutive defences  
402 based on secondary metabolites such as alkaloids (Stout *et al.*, 1998) and (poly)  
403 phenolics under varying N regimes (Johnson *et al.*, 1987). Since N is also important  
404 for synthesis of various secondary metabolites, severe depletion of N can also  
405 impact defense related pathways. Hence, plants may not be able to activate  
406 adequate defense pathways for tolerance or resistance (Snoeiijers *et al.* 2000). Ward  
407 *et al.* (2010) have previously shown that plant reconfigure their metabolism in  
408 response to N supply. Plants take up N in the form of  $\text{NH}_4^+$  or  $\text{NO}_3^-$  or a  
409 combination of both. Different N forms differentially effect various free radicals such  
410 as NO and ROS (Wany *et al.* 2018; Gupta *et al.* 2013). Ammonium uptake and  
411 assimilation is less costly to the plants in comparison to  $\text{NO}_3^-$  but excess of  $\text{NH}_4^+$  can  
412 cause toxic effects to the plants (Boudsocq *et al.* 2012; Liu *et al.* 2017), hence, many  
413 plants preferentially use  $\text{NO}_3^-$  as N source.  $\text{NO}_3^-$  nutrition can also enhance plant  
414 defence via increased generation of NO, polyamines and SA (Gupta *et al.* 2013;  
415 Fagard *et al.* 2014). Under  $\text{NH}_4^+$  nutrition plants compromise in resistance due to

416 reduced NO, increased sugars, aminoacids and enhancement of  $\gamma$ -aminobutyric acid  
417 (GABA) levels which may be source of nutrition for pathogens (Gupta *et al.* 2013)  
418 Hence, here we chose to check the plant defense response under  $\text{NO}_3^-$  nutrition  
419 rather than under  $\text{NH}_4^+$ .

420 Plants grown on 0.1 mM  $\text{NO}_3^-$  showed reduced growth (Fig. **S3**) and  
421 morphological parameters (Fig. **S3**), suggesting that the supplied 0.1 mM  $\text{NO}_3^-$  is  
422 insufficient for optimal growth of plants and consequently would likely reduce the  
423 available resources which could be allocated to defense. In our experiments, 0.1 mM  
424  $\text{NO}_3^-$  grown plants were compromised in both LAR and SAR (Fig. **1,2**) responses,  
425 suggesting that  $\text{NO}_3^-$  is required for better defense. Plants grown on low  $\text{NO}_3^-$   
426 produced less SA (Fig. **12a**), further supporting the notion that  $\text{NO}_3^-$  is needed for  
427 SA biosynthesis. Since plants need N for growth and disease resistance, increasing  
428 their N use efficiency may be an effective manner to improve their resistance.  
429 Certain types of *Trichoderma* aid in nutrient absorption leading to increased growth  
430 and enhanced plant defense (Brotman *et al.* 2010). It was previously demonstrated  
431 that supplementation of plants with *Trichoderma asperelloides* enhances plant  
432 growth (Brotman *et al.* 2012), and protects against abiotic and biotic stressors-  
433 moreover, It was, moreover, demonstrated to induce systemic resistance responses  
434 (Contreras-Cornejo *et al.* 2016; Brotman *et al.* 2012). *Trichoderma* induced  
435 increased growth has been varyingly attributed to auxin and ethylene (Garnica-  
436 Vergara *et al.* 2016) and the induction of genes involved in carbon and N metabolism  
437 (Domínguez *et al.* 2016). However, there are hardly any reports concerning the  
438 mechanism(s) underlying *Trichoderma*-mediated plant growth and defense  
439 improvement under N starvation. In the current study, we unraveled the mechanism  
440 of *Trichoderma*-induced plant growth and defense under low N. Hence, in this  
441 current work, we studied the impact of *Trichoderma* on enhancing N uptake and  
442 supporting both LAR and SAR responses under low  $\text{NO}_3^-$  stress.

443 The enhanced growth of plants grown in the presence of *Trichoderma* is due  
444 to an increased  $\text{NO}_3^-$  uptake (Fig. 3a) which was also evidenced by increased  
445 expression of *NRT2.1*, *NRT2.2* (Fig. **4a,b,c,d,e**) and increased total cellular protein  
446 levels (Fig. **4f**). *NRT2.1* is the main HAT, localized at the plasma membrane.  
447 Previously, it was shown that these transporters become active during N starvation  
448 and are severely inhibited when reduced nitrate sources such as glutamine or



449 ammonium are provided (Dechorgnat *et al.* 2012). Similarly, *NRT2* is also induced  
450 under low N (Dechorgnat *et al.* 2012). In response to *Trichoderma* treatment, a rapid  
451 induction of *NRT2.1*, *NRT2.2* transcripts in both plants grown with 0.1 and 3 mM  
452  $\text{NO}_3^-$  was observed during *Pst* inoculation. *NRT2.1* involvement was further  
453 evidenced by the fact that the *nrt2.1* mutant produced less protein under low N and  
454 even the addition of *Trichoderma* was unable to increase protein content in this  
455 mutant (Fig. 4f). Furthermore, this mutant become highly susceptible to LAR and  
456 SAR under low N (Fig. 11). It thus appears reasonable to assume that *Trichoderma*  
457 can increase N uptake and by this means enhance resistance

458 Hence, in further experiments, we focused on the LAR and SAR responses under  
459 low and optimum  $\text{NO}_3^-$  in the presence or absence of *Trichoderma*. During local *Pst*  
460 infection, the plants display a LAR response, and the systemic/distal leaves induce a  
461 SAR response. Both are critically important for plant defense against pathogens.

462 In 3 mM  $\text{NO}_3^-$ -fed WT plants, the defense response after the secondary  
463 challenge was also more rapid, robust and even longer-lasting till 5 days post  
464 challenge (data not shown) whereas, 0.1 mM  $\text{NO}_3^-$  fed WT plants showed disease  
465 symptoms suggesting that  $\text{NO}_3^-$  concentration plays a key role in the development of  
466 both LAR and SAR (Fig. 1a, 2a and S1b).

467 One of the features of *Trichoderma* is the induction of short-term spikes  
468 of NO This molecule play an important role in induction of plant defense responses  
469 (Gupta *et al.* 2014). We suspected the role of NO in activating genes of these  
470 transporters. Indeed, *Trichoderma* induced expression of *NRTs* are most likely  
471 mediated by short term increase in NO upon *Trichoderma* inoculation. NR-  
472 dependent NO elicited by *Trichoderma* is probably responsible for the increased  
473 expression of HATs since our experiments revealed that the  $\text{Hb}^+$  lines and the  
474 *nia1,2* mutant, were unable to induce HATs and showed decline in protein levels  
475 even in the presence of *Trichoderma* (Fig. 6c). *Trichoderma* trigger the SA-  
476 dependent SAR pathway (Pieterse *et al.* 2014), they induced ROS involved in the  
477 plant's resistance response against many biotic stressors (Asmawati *et al.* 2017).  
478 They additionally plays an important role in hypersensitive cell death together with  
479 NO (Durner and Klessig 1999, Dorey *et al.* 1999). Among ROS,  $\text{H}_2\text{O}_2$  is the most  
480 stable form which plays an important role as a signal transducer in the plant cell



481 death process (Pieterse *et al.* 2014), and acts as a key modulator of NO in triggering  
482 cell death. As shown in Fig. **8a** *Trichoderma* treated low N fed plants displayed  
483 increased H<sub>2</sub>O<sub>2</sub> levels, thus, enabling the initiation and the establishment of SAR .  
484 Superoxides (O<sub>2</sub><sup>-</sup>) are mainly produced via mitochondrial electron transport and  
485 NADPH oxidases during stress plays a role in plant defense (Torres *et al.* 2002,  
486 2005). Earlier, it was shown that the extracellular elicitors isolated from *Trichoderma*  
487 *viridae* also induces O<sub>2</sub><sup>-</sup> levels (Calderon *et al.* 1994). Here, we also found that in the  
488 presence of *Trichoderma* , 0.1 mM NO<sub>3</sub><sup>-</sup> grown *Pst* inoculated plants show higher O<sub>2</sub><sup>-</sup>  
489 levels than in the absence of *Trichoderma* (Fig.**8b**), suggesting that it can enhance  
490 O<sub>2</sub><sup>-</sup> production during infection which can aid in defense. Consequently, the  
491 expression of defense marker genes such as *PR1*, *PR2*, *PR5* and *PAL1* (Fig. **9**)  
492 were also highly induced in the presence of *Trichoderma* in low NO<sub>3</sub><sup>-</sup>-fed plants  
493 suggesting that *Trichoderma*-mediated ROS andNO along with increased N are  
494 probably responsible for higher induction of these genes. Martinez-Medina *et al.*  
495 (2013), reported several *Trichoderma* strains are known to induce systemic  
496 responses by acting as a "short circuit" in plant defense signaling. *PAL1* is an  
497 important marker gene in SA mediated defense (Kim and Hwang 2014) and  
498 accumulates in cells undergoing HR (Dorey *et al.* 1997) and is thought to be  
499 essential for local and systemic resistance (Delaney *et al.* 1994). The fact that *PAL1*  
500 levels were increased by *Trichoderma* is intriguing. The SAR response is associated  
501 with a specific set of SAR genes encoding pathogenesis related (PR) proteins  
502 (Pieterse *et al.* 1996). In our study these *PR* genes are activated and consequently  
503 accumulate during SAR (Fig.**9b,c,d**) in keeping with the earlier findings of Brotman  
504 *et al.* (2012) and Pieterse *et al.* (1996).

505 In our study, the SAR regulatory genes *DIR1*, *NPR1* and *TGA3* are induced in the  
506 presence of *Trichoderma* under low N stress. The *npr1* mutant is compromised in  
507 LAR and SAR in the presence of *Trichoderma* suggesting a role for this gene in  
508 enhancing defense. In the *nahG* transgenic line, defense responses are slightly  
509 enhanced in the presence of *Trichoderma* in spite of reduced SA levels, suggesting  
510 that apart from SA other factors such as increased NO and ROS are probably  
511 responsible for defense in this mutant. Overall, our study demonstrated that optimum  
512 N is required for both LAR and SAR. *Trichoderma* can enhance N uptake via  
513 modulating N transporters and via eliciting short term NO under low NO<sub>3</sub><sup>-</sup> nutrition.

514 The enhanced N uptake plays a role in enhancing SA levels and defense gene  
515 expression in local and distal leaves to increase overall plant defense (Fig. **13**).  
516 These defense responses are neither activated in *npr1*, , *nrt2.1*, or *nia1,2* mutants;  
517 nor in the *nahG* and *Hb<sup>+</sup>* transgenic lines providing corroborative evidence that  
518 *Trichoderma* mediated enhanced resistance under low NO<sub>3</sub><sup>-</sup> involves synergistic  
519 roles of NO, ROS and SA. Further work is needed on how this mechanism works in  
520 key crop plants. Understanding the role of *Trichoderma* in improving nitrogen use  
521 efficiency (NUE) in response to different pathogens which have diverse strategies  
522 can help in improving plant resistance to pathogens and improving plant productivity  
523 when limited N available. N is important for plant defense as well as growth hence  
524 using beneficial *Trichoderma* can be a great tool to confer multifaceted benefits to  
525 the plants and improve crop resilience under reduced N availability

526

## 527 **Material and Methods**

### 528 **Plant material and growth conditions**

529 Seeds of *Arabidopsis thaliana* ecotype Columbia 0 (*Col0*; WT) were sown in  
530 plastic pots (6.5 X 7.5 cm) containing autoclaved soilrite: agropeat (1:1) mix and  
531 stratified at 4°C in the dark for 48 h. The pots were then kept in a growth room under  
532 short day conditions (8h-light, 16h-dark), 22/18°C (day/night) temperatures, relative  
533 humidity of 60% and 180-200  $\mu\text{E m}^{-2} \text{s}^{-1}$  light intensity. Initially, plants were bottom  
534 irrigated for a week, once with half strength Hoagland's solution and once with  
535 water. Then, 0.1 and 3 mM NO<sub>3</sub><sup>-</sup> concentrations were provided to the growing plants  
536 weekly. The NO<sub>3</sub><sup>-</sup> nutrient solution in Hoagland's media contained either 0.1 mM or 3  
537 mM KNO<sub>3</sub>, according to modified Hoagland's nutrient solution (Hoagland and Arnon,  
538 1950). 28-30 day-old plants with fully developed rosettes were used for the  
539 experiments. The seeds of *nrt2.1* (SALK\_035429C) and *nia1,2* (N6936) were  
540 procured from ABRC.

541

### 542 ***Trichoderma* supplementation**

543 *T. asperelloides* (T203 strain) was grown on potato dextrose agar (PDA;  
544 Himedia) plates for 15 days under low light conditions until sporulation. Conidia were  
545 harvested by gently scraping the petridish and pouring 10 ml of sterile water over the  
546 surface and collecting the resultant suspension. Spores were evaluated up to  $1 \times 10^9$

547 spores/ml. It was thoroughly mixed into the soilrite mix and distributed into the  
548 individual plastic pots. WT plants in *Trichoderma* supplemented pots were also  
549 grown similarly as described above.

550

### 551 **Pathogen preparation and infiltration**

552 *Pseudomonas syringae* pv. tomato DC3000 (*Pst*DC3000; *avrRpm1*, avirulent)  
553 were grown in King's B (KB) medium containing 50 µg ml<sup>-1</sup> rifampicin. Primary and  
554 secondary culture was prepared according to standard protocols (Liu *et al.* 2015).  
555 The avirulent bacterial density was adjusted to 2×10<sup>7</sup> CFU ml<sup>-1</sup> for LAR assay and  
556 primary inoculations and virulent *P. syringae* was used at 2×10<sup>6</sup> CFU ml<sup>-1</sup> for  
557 challenge inoculations. Mock infiltration (control) was performed with 10 mM MgCl<sub>2</sub>.  
558 *Pst* inoculations were made by syringe infiltration on the abaxial side of the leaves  
559 manually (Liu *et al.* 2015).

560

### 561 **LAR Assay**

562 The procedure of the LAR assay is described schematically in Fig. **S3 a&b**.  
563 30-day-old plants were used for this experimental set up and were transferred to an  
564 infection room prior to pathogen infiltration. Two sets of experiments were performed  
565 simultaneously, the first set were mock infiltrated (10 mM MgCl<sub>2</sub>) plants and the  
566 second set were the pathogen infiltrated (avirulent *Pst*DC3000; *avrRpm1*) plants.  
567 The pathogen inoculated leaves were harvested at 0, 6, 24 and 48 hours post  
568 inoculation for RNA extraction and other assays. This assay was repeated more  
569 than three times in order to ensure the reproducibility of the results.

570

### 571 **SAR Assay**

572 The procedure of the SAR assay is described schematically in Fig. **S3c**. The  
573 SAR assay was performed according to the protocol described in Cameron *et al.*  
574 (1999) in a specific infection room with appropriate growth conditions. Primary  
575 inoculation was performed with avirulent *Pst*DC3000 (*avrRpm1*) on one leaf per  
576 plant (marked with pink sticker; Fig. **S1b**) and the entire experimental set up was left  
577 for two days. Thereafter, a secondary (challenge) inoculation was performed with  
578 virulent *P. syringae* on four outer leaves (marked with black marker pen) other than  
579 primary inoculated leaf (Fig. **S1b**). Further, there were 5-6 non-inoculated distal  
580 leaves left per plant. Hereafter, the inoculated leaves are described as *Pst* or

581 inoculated leaves and non-inoculated leaves are described as distal throughout the  
582 text. The inoculated and distal leaves from each treatment were harvested (Fig. **S3**)  
583 for RNA extraction and other experiments post challenge inoculation. This assay  
584 was repeated more than three times in order to obtain reproducible results.

585

### 586 **Electrolyte leakage**

587 Leaf discs (5 mm diameter) were taken and electrolyte leakage was  
588 monitored exactly as described in (Gupta *et al.* 2013).

589

### 590 ***In planta* bacterial number quantification assay**

591 The bacterial number in leaves from *Pst* treated plants during LAR and SAR  
592 responses were assessed was calculated as per Gupta *et al.* (2016).

593

### 594 **Determination of nitrate levels and nitrate uptake assays**

595 Nitrate levels in leaves were determined using the protocol described in  
596 Hachiya and Okamoto (2017). The schematic representation of the experimental  
597 design and nitrate uptake assay in leaves is shown in Fig. **S4a and b**. Nitrate levels  
598 were also determined in 1 g each of S: A mixture, 0.1 mM N fed S: A mixture and 3  
599 mM N fed S: A mixture (with and without *Trichoderma*; Fig. **S4c**). The procedure for  
600 nitrate determination in S: A mix and leaves is mentioned below.

#### 601 ***Nitrate determination in S: A mix***

602 For determining the basal nitrate levels, the individual pots were filled with S:  
603 A mixture (with and without *Trichoderma*) and 0.1 mM and 3 mM nitrate was  
604 supplied, allowed to soak for 2 hours and excess was drained off by pressing. The  
605 detailed protocol is described in Fig. **S4a and b** (Supplementary Information).  
606 Apparent nitrate was calculated from a standard curve of nitrate concentration (Fig.  
607 **S4d**) using the absorbance values at 410 nm.

#### 608 ***Nitrate determination in leaves***

609 Nitrate uptake was measured in leaves of 0.1 mM and 3 mM nitrate grown  
610 WT in the presence and absence of *Trichoderma* plants till 15 days and is  
611 represented as percent (%) nitrate uptake up to Day 15 (Fig. **S4b, Fig. 3a**). For each  
612 nitrate treatment, six pots containing healthy rosettes (22 d old) were filled with  
613 autoclaved S: A mixture (with and without *Trichoderma*). The detailed protocol is  
614 described in Supplementary Information of Fig. **S4b**.

615

### 616 **Expression profiling by qRT-PCR**

617 Inoculated and non-inoculated leaves were immediately frozen in liquid  
618 nitrogen and stored at -80°C. RNA extraction, cDNA synthesis and qPCR was  
619 performed according to Wany *et al.* (2017; 2018). The synthesized cDNAs were  
620 used as templates in qRT-PCRs using the primers listed in Table S1. Fold change in  
621 the expression of the target genes was normalized to the *Arabidopsis* reference  
622 genes; ubiquitin, *18sRNA* (GQ380689) and *YSL8* (X69885.1). Fold expression  
623 relative to control treatment was determined by  $\Delta\Delta CT$  values. Three biological  
624 experiments (with three independent replicates for each experiment) were performed  
625 for each treatment.

626

### 627 **NO estimation**

628 For this experiment, NO was measured from the following five different  
629 combinations in roots; 1. WT; 2. WT + *T203* (*Trichoderma*); 3. *nia1,2* double mutants  
630 + *T203*; 4. WT + cPTIO (carboxy-PTIO potassium salt); 5. WT + cPTIO + *T203*. WT  
631 and *nia1,2* plants were grown for one week in plates containing 0.1 mM and 3 mM  
632  $NO_3^-$  concentrations. A spore suspension of *Trichoderma* was poured over these 7d  
633 old plants and incubated for 2 minutes, 10 minutes and 24 hours, respectively. Then,  
634 the roots were incubated in 10  $\mu M$  DAF-FM DA (4-amino-5-methylamino- 2',7'-  
635 difluorofluorescein diacetate) in 100 mM HEPES buffer (pH 7.2) placed in a 1.5 ml  
636 tube, incubated for 15 minutes in the dark and photographed using a fluorescence  
637 microscope (Nikon80i, Japan) set at 495 nm excitation and 515 nm emission  
638 wavelengths.

639

### 640 **Determination of ROS levels**

641 Production of hydrogen peroxide ( $H_2O_2$ ) in inoculated and distal leaves was  
642 detected by Diaminobenzidine tetrahydrochloride (DAB) staining as per Daudi *et al.*  
643 (2012) Superoxide levels were measured by *in vivo* staining with Nitroblue  
644 tetrazolium chloride (NBT, SA, USA) (Jambunathan, 2010).

645

### 646 **Histochemical detection of HR**

647 Hypersensitive cell death in inoculated leaves was visualized by the trypan  
648 blue staining method according to Fernández-Bautista *et al.* (2002).

649

## 650 **SA levels**

651 The SA levels were measured by HPLC according to the protocol described in  
652 Singh *et al.* (2013).

653

## 654 **Acknowledgements**

655 We thank Dr. Yariv Brotman for providing the *T203* strain. Seeds of *nahG* and  
656 *npr1* mutants were provided by Prof. Ashis Nandi, JNU. Seeds of *nsHb<sup>+</sup> over-*  
657 *expressing transgenic lines* was provided by Dr. Kim Hebelstrup. This research was  
658 funded by SERB, DST (NPDF to AW), UGC (SRF to PKP) and SERB-ECR and  
659 DBT-IYBA award to KJG. CIF of NIPGR is greatly acknowledged.

## 660 **References**

661 **Astier, J., Gross, I. and Durner, J.** (2018) Nitric oxide production in plants: an  
662 update. *J. Exp. Bot.* **69**, 3401-3411.

663 **Alvarez, M. E., Pennell, R. I., Meijer, P. J. et al.** (1998) Reactive oxygen  
664 intermediates mediate a systemic signal network in the establishment of plant  
665 immunity. *Cell.* **92**, 773-784.

666 **Alves, M., Dadalto, S., Gonçalves, A. et al.** (2014) Transcription factor functional  
667 protein-protein interactions in plant defense responses. *Proteomes.* **2**, 85-106.

668 **Asmawati, L., Widiastuti, A. and Sumardiyono, C.** (2017) Induction of Reactive  
669 Oxygen Species by *Trichoderma* spp. Against Downy Mildew in Maize.  
670 In *Proceedings of the 1st International Conference on Tropical Agriculture*. Springer,  
671 Cham :139-146.

672 **Boudsocq, S., Niboyet, A. and Lata, J. C. et al.** (2012) Plant preference for  
673 ammonium versus nitrate: a neglected determinant of ecosystem functioning?. *Am*  
674 *Nat.* **180**, 60-69.

675 **Brotman, Y., Lisec, J. and Méret, M. et al.** (2012) Transcript and metabolite  
676 analysis of the *Trichoderma*-induced systemic resistance response to *Pseudomonas*  
677 *syringae* in *Arabidopsis thaliana*. *Microbiology.* **158**, 139-146.

- 678 **Brotman, Y., Gupta, K. J. and Vetribo, A.** (2010) *Trichoderma*: Quick Guide. ***Curr***  
679 ***Biol.* 20**, 390-391.
- 680 **Calderon, A. A., Zapata, J. M. and Barcelo, A. R.** (1994) Peroxidase-mediated  
681 formation of resveratrol oxidation products during the hypersensitive-like reaction of  
682 grapevine cells to an elicitor from *Trichoderma viride*. *Physiol Mol Plant Path.* **44**,  
683 289-299.
- 684 **Cameron, R. K., Dixon, R. A. and Lamb, C. J.** (1994) Biologically induced systemic  
685 acquired resistance in *Arabidopsis thaliana*. *Plant J.* **5**, 715-725.
- 686 **Cameron, R. K., Paiva, N. L., Lamb, C. J. et al.** (1999) Accumulation of salicylic  
687 acid and *PR-1* gene transcripts in relation to the systemic acquired resistance (SAR)  
688 response induced by *Pseudomonas syringae* pv. tomato in *Arabidopsis*. *Physiol Mol*  
689 *Plant Path.* **55**, 121-130.
- 690 **Cao, H., Glazebrook, J., Clarke, J. D. et al.** (1997) The *Arabidopsis* NPR1 gene  
691 that controls systemic acquired resistance encodes a novel protein containing  
692 ankyrin repeats. *Cell.* **88**, 57-63.
- 693 **Carella, P., Isaacs, M. and Cameron, R. K.** (2015) Plasmodesmata-located protein  
694 overexpression negatively impacts the manifestation of systemic acquired resistance  
695 and the long-distance movement of Defective in Induced Resistance1 in *A*  
696 *rabidopsis*. *Plant Biol.* **17**, 395-401.
- 697 **Champigny, M. J., Isaacs, M., Carella, P. et al.** (2013) Long distance movement of  
698 DIR1 and investigation of the role of DIR1-like during systemic acquired resistance in  
699 *Arabidopsis*. *Front Plant Sci.* **4**, 230.
- 700 **Contreras-Cornejo, H. A., Macías-Rodríguez, L., del-Val, E. et al.** (2016)  
701 Ecological functions of *Trichoderma* spp. and their secondary metabolites in the  
702 rhizosphere: interactions with plants. ***FEMS Microbiol Ecol.* 92**, fiw036.
- 703 **Daudi, A. and O'Brien, J. A.** 2012. Detection of hydrogen peroxide by DAB staining  
704 in *Arabidopsis* leaves. *Bio-Protocol.* **2**, 1-4.



- 705 **Dechorgnat, J., Patrit, O., Krapp, A. et al.** (2012) Characterization of the Nrt2. 6  
706 gene in *Arabidopsis thaliana*: a link with plant response to biotic and abiotic  
707 stress. *PLoS one*. **7**, e42491.
- 708 **Delaney, T. P., Uknes, S., Vernooij, B. et al.** (1994) A central role of salicylic acid in  
709 plant disease resistance. *Science*. **266**, 1247-1250.
- 710 **Delledonne, M., Xia, Y., Dixon, R. A. et al.** (1998) Nitric oxide functions as a signal  
711 in plant disease resistance. *Nature*. **394**, 585.
- 712 **Dietrich, R., K. Ploss, and M. Heil.** (2004) Constitutive and induced resistance to  
713 pathogens in *Arabidopsis thaliana* depends on nitrogen supply. *Plant Cell*  
714 *Environ.* **27**, 896-906.
- 715 **Domínguez, S., Rubio, M. B., Cardoza, R. E. et al.** (2016) Nitrogen metabolism  
716 and growth enhancement in tomato plants challenged with *Trichoderma harzianum*  
717 expressing the *Aspergillus nidulans* acetamidase *amdS* gene. *Front Microbiol.* **7**,  
718 1182.
- 719 **Dorey, S., Baillieul, F., Pierrel, M. A. et al.** (1997) Spatial and temporal induction of  
720 cell death, defense genes, and accumulation of salicylic acid in tobacco leaves  
721 reacting hypersensitively to a fungal glycoprotein elicitor. *Mol Plant Microbe.* **10**,  
722 646–655.
- 723 **Dorey, S., Kopp, M., Geoffroy, P. et al.** (1999) Hydrogen peroxide from the  
724 oxidative burst is neither necessary nor sufficient for hypersensitive cell death  
725 induction, phenylalanine ammonia lyase stimulation, salicylic acid accumulation, or  
726 scopoletin consumption in cultured tobacco cells treated with elicitor. *Plant*  
727 *Physiol.* **121**, 163-172.
- 728 **Durner, J. and Klessig, D. F.** (1999) Nitric oxide as a signal in plants. *Curr Opin*  
729 *Plant Biol.* **2**, 369-374.
- 730 **Fagard, M., Launay, A., Clément, G. et al.** (2014) Nitrogen metabolism meets  
731 phytopathology. *J Exp Bot.* **65**, 5643-5656.

- 732 **Fernández-Bautista, N., Domínguez-Núñez, J. A., Moreno, M. C. et al.** (2002)  
733 Plant tissue trypan blue staining during phytopathogen infection. *Bio-Protocol*. **6**,  
734 e2078.
- 735 **Frungillo, L., de Oliveira, J. F. P., Saviani, E. E. et al.** (2013) Modulation of  
736 mitochondrial activity by *S-nitrosoglutathione reductase* in *Arabidopsis thaliana*  
737 transgenic cell lines. *BBA-Bioenergetics*. **1827**, 239-247.
- 738 **Garnica-Vergara, A., Barrera-Ortiz, S., Muñoz-Parra, E. et al.** (2016) The volatile  
739 6-pentyl-2H-pyran-2-one from *Trichoderma atroviride* regulates *Arabidopsis thaliana*  
740 root morphogenesis via auxin signaling and ETHYLENE INSENSITIVE 2  
741 functioning. *New Phytol.* **209**, 1496-1512.
- 742 **Gupta, A., Dixit, S. K. and Senthil-Kumar, M.** (2016) Drought stress predominantly  
743 endures *Arabidopsis thaliana* to *Pseudomonas syringae* infection. *Front. Plant Sci.* **7**,  
744 808.
- 745 **Gupta, K. J., Mur, L. A. and Brotman, Y.** (2014) *Trichoderma asperelloides*  
746 suppresses nitric oxide generation elicited by *Fusarium oxysporum* in *Arabidopsis*  
747 roots. *Mol Plant Microbe Interact.* **27**, 307-314.
- 748 **Gupta, K. J., Brotman, Y., Segu, S. et al.** (2013) The form of nitrogen nutrition  
749 affects resistance against *Pseudomonas syringae* pv. *phaseolicola* in  
750 tobacco. *J Exp Bot.* **64**, 553-568.
- 751 **Hachiya, T. and Okamoto, Y.** (2017) Simple spectroscopic determination of nitrate,  
752 nitrite, and ammonium in *Arabidopsis thaliana*. *Bio-Protocol*. **7**.
- 753 **Hoagland, D. R. and Arnon, D. I.** (1950) The water-culture method for growing  
754 plants without soil. *Circular. Calif. Agr. Exp. Sta. Cir.* **347**.
- 755 Jambunathan, N. (2010) Determination and detection of reactive oxygen species  
756 (ROS), lipid peroxidation, and electrolyte leakage in plants. *Methods Mol Biol.* **639**,  
757 292–298.
- 758 **Jones, J. D. and Dangl, J. L.** (2006) The plant immune system. *Nature*. **444**, 323.

- 759 **Johnson, N. D., Liu, B. and Bentley, B. L.** (1987) The effects of nitrogen fixation,  
760 soil nitrate, and defoliation on the growth, alkaloids, and nitrogen levels of *Lupinus*  
761 *succulentus* (Fabaceae). *Oecologia*. **74**, 425-431.
- 762 **Kim, D. S. and Hwang, B. K.** (2014) An important role of the pepper phenylalanine  
763 ammonia-lyase gene (PAL1) in salicylic acid-dependent signalling of the defence  
764 response to microbial pathogens. *J Exp Bot.* **65**, 2295-2306.
- 765 **Krapp, A., David, L. C., Chardin, C. et al.** (2014) Nitrate transport and signalling in  
766 *Arabidopsis*. *J Exp Bot.* **65**, 789-798.
- 767 **Lamb, C. and Dixon, R. A.** (1997) The oxidative burst in plant disease  
768 resistance. *Annu Rev Plant Biol.* **48**, 251-275.
- 769 **Landrein, B., Formosa-Jordan, P., Malivert, A. et al.** (2018) Nitrate modulates  
770 stem cell dynamics in *Arabidopsis* shoot meristems through cytokinins. *PNAS*  
771 *USA*. **115**, 1382-1387.
- 772 **Li, H., Hu, B. and Chu, C.** (2017) Nitrogen use efficiency in crops: lessons from  
773 *Arabidopsis* and rice. *J Exp Bot.* **68**, 2477-2488.
- 774 **Liu, Y. and von Wirén, N.** (2017) Ammonium as a signal for physiological and  
775 morphological responses in plants. *J Exp Bot.* **68**, 2581-2592.
- 776 **Maldonado, A. M., Doerner, P., Dixon, R. A. et al.** (2002) A putative lipid transfer  
777 protein involved in systemic resistance signalling in *Arabidopsis*. *Nature*. **419**, 399-  
778 403.
- 779 **Martínez-Medina, A., Fernández, I., Sánchez-Guzmán, M. J. et al.** (2013)  
780 Deciphering the hormonal signalling network behind the systemic resistance induced  
781 by *Trichoderma harzianum* in tomato. *Front Plant Sci.* **4**, 206.
- 782 **Métraux, J. P., Signer, H., Ryals, J. et al.** (1990) Increase in salicylic acid at the  
783 onset of systemic acquired resistance in cucumber. *Science*, **250**, 1004-1006.
- 784 **Mur, L. A., Brown, I. R., Darby, R. M. et al.** (2000) A loss of resistance to avirulent  
785 bacterial pathogens in tobacco is associated with the attenuation of a salicylic  
786 acid-potentiated oxidative burst. *Plant J.* **23**, 609-621.

- 787 **Mur, L. A., Kenton, P., Lloyd, A. J. et al.** (2008) The hypersensitive response; the  
788 centenary is upon us but how much do we know?. *J Exp Bot.* **59**, 501-520.
- 789 **Mur, L. A., Simpson, C., Kumari, A. et al.** (2017) Moving nitrogen to the centre of  
790 plant defence against pathogens. *Ann. Bot.* **119**, 703-709.
- 791 **O'Brien, J. A., Vega, A., Bouguyon, E. et al.** (2016) Nitrate transport, sensing, and  
792 responses in plants. *Mol Plant.* **9**, 837-856.
- 793 **Oliva, R. and Quibod, I. L.** (2017) Immunity and starvation: new opportunities to  
794 elevate disease resistance in crops. *Curr Opin Plant Biol.* **38**, 84-91.
- 795 **Park, S. W., Kaimoyo, E., Kumar, D. et al.** (2007). Methyl salicylate is a critical  
796 mobile signal for plant systemic acquired resistance. *Science.* **318**, 113-116.
- 797 **Pieterse, C. M., Van Wees, S. C., Hoffland, E. et al.** (1996) Systemic resistance in  
798 Arabidopsis induced by biocontrol bacteria is independent of salicylic acid  
799 accumulation and pathogenesis-related gene expression. *Plant Cell.* **8**, 1225-1237.
- 800 **Pieterse, C. M., Zamioudis, C., Berendsen, R. L. et al.** (2014) Induced systemic  
801 resistance by beneficial microbes. *Annu Rev Phytopathol.* **52**, 347-375.
- 802 **Ryals, J. A., Neuenschwander, U. H., Willits, M. G. et al.** (1996) Systemic  
803 acquired resistance. *Plant cell.* **8**, 1809.
- 804 **Shoresh, M., Harman, G. E. and Mastouri, F.** (2010) Induced systemic resistance  
805 and plant responses to fungal biocontrol agents. *Annu Rev Phytopathol.* **48**, 21-43.
- 806 **Shoresh, M., Yedidia, I. and Chet, I.** (2005) Involvement of jasmonic acid/ethylene  
807 signaling pathway in the systemic resistance induced in cucumber by *Trichoderma*  
808 *asperellum* T203. *Phytopathology.* **95**, 76-84.
- 809 **Singh, V., Roy, S., Giri, M. K., Chaturvedi, R. et al.** (2013) Arabidopsis thaliana  
810 FLOWERING LOCUS D is required for systemic acquired resistance. *MPMI.* **26**,  
811 1079-1088.
- 812 **Snoeijers, S. S., Pérez-García, A., Joosten, M. H. et al.** (2000) The effect of  
813 nitrogen on disease development and gene expression in bacterial and fungal plant  
814 pathogens. *Eur J Plant Pathol.* **106**, 493-506.

- 815 **Stout, M. J., Brovont, R. A. and Duffey, S. S.** (1998) Effect of nitrogen availability  
816 on expression of constitutive and inducible chemical defenses in tomato,  
817 *Lycopersicon esculentum*. *J. Chem. Ecol.* **24**, 945-963.
- 818 **Torres, M. A., Dangl, J. L. and Jones, J. D.** (2002) Arabidopsis gp91phox  
819 homologues AtrbohD and AtrbohF are required for accumulation of reactive oxygen  
820 intermediates in the plant defense response. *PNAS.* **99**, 517-522.
- 821 **Torres, M. A., Jones, J. D. and Dangl, J. L.** (2005) Pathogen-induced, NADPH  
822 oxidase-derived reactive oxygen intermediates suppress spread of cell death in  
823 Arabidopsis thaliana. *Nat. Genet.* **37**, 1130-1134.
- 824 **Tsay, Y. F., Chiu, C. C., Tsai, C. B. et al.** (2007) Nitrate transporters and peptide  
825 transporters. *FEBS Lett.* **581**, 2290-2300.
- 826 **Walker, R. L., Burns, I. G. and Moorby, J.** (2001) Responses of plant growth rate  
827 to nitrogen supply: a comparison of relative addition and N interruption treatments. *J*  
828 *Exp Bot.* **52**, 309-317.
- 829 **Ward, J. L., Forcat, S., Beckmann, M. et al.** (2010) The metabolic transition during  
830 disease following infection of *Arabidopsis thaliana* by *Pseudomonas syringae* pv.  
831 *tomato*. *Plant J.* **63**, 443-4
- 832 **Wang, L., Tsuda, K., Truman, W. et al.** (2011) CBP60g and SARD1 play partially  
833 redundant critical roles in salicylic acid signaling. *Plant J.* **67**, 1029-1041.
- 834 **Wany, A., Gupta, A. K., Kumari, A. et al.** (2019) Nitrate nutrition influences multiple  
835 factors in order to increase energy efficiency under hypoxia in Arabidopsis. *Ann*  
836 *Bot.* **123**, 691-705.
- 837 **Wany, A., Kumari, A., and Gupta, K. J.** (2017) Nitric oxide is essential for the  
838 development of aerenchyma in wheat roots under hypoxic stress. *Plant, cell*  
839 *environ.* **40**, 3002-3017.
- 840 **Yedidia, I., Shoresh, M., Kerem, Z. et al.** (2003) Concomitant induction of systemic  
841 resistance to *Pseudomonas syringae* pv. lachrymans in cucumber by *Trichoderma*  
842 *asperellum* (T-203) and accumulation of phytoalexins. *Appl. Environ. Microbiol.* **69**,  
843 7343-7353.

844 **Zhang, Y., Xu, S., Ding, P. et al.** (2010) Control of salicylic acid synthesis and  
845 systemic acquired resistance by two members of a plant-specific family of  
846 transcription factors. *PNAS*. **107**, 18220-18225.

847

848

849

850

851

852

853

854

855

856

857

858

859

860

861

862

863 Figures

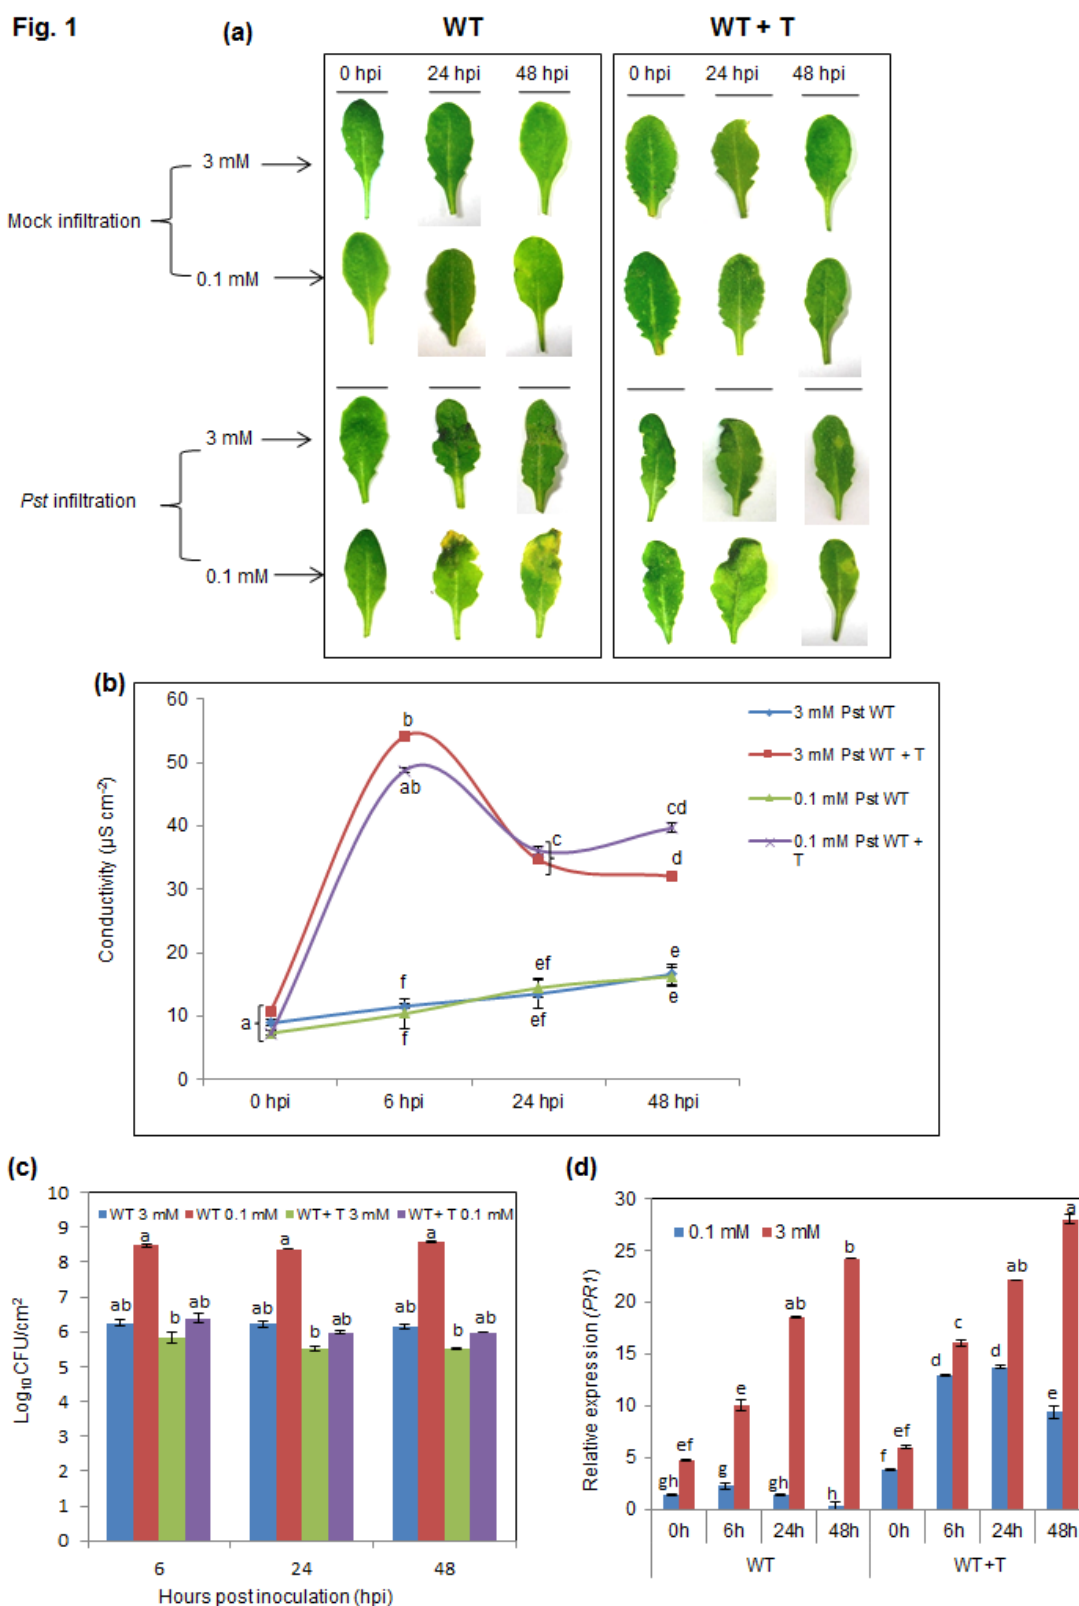

864

865

**Fig 1: *Trichoderma* supplementation enhances LAR response elicited by**

866

***PstDC3000/avrRpm1* in low nitrate grown WT plants**



867 LAR response shown by WT and WT+T grown plants fed with 0.1 mM and 3  
868 mM nitrate nutrition subjected to *Pst*DC3000/avrRpm1 infection. Two sets of plants  
869 viz., control WT plants for *Pst* treatment were grown in autoclaved un-inoculated  
870 soilrite: agropeat mixture and treated WT plants were grown in pots with soilrite:  
871 agropeat with *Trichoderma* spore suspension and denoted as WT+T plants.

872 (a) *Pst*DC3000-avrRpm1 mediated HR phenotype observed in 3 mM and 0.1 mM  
873 NO<sub>3</sub><sup>-</sup> grown WT and WT+ T plants at different time points. First panel shows the  
874 mock infiltrated leaves i.e., control leaves treated with 10 mM MgCl<sub>2</sub> and second  
875 panel shows *Pst* infiltrated leaves. Image is representative of 4 independent  
876 replicates.

877 (b) Electrolyte leakage from infiltrated leaf areas with *Pst* in 0.1 mM and 3 mM NO<sub>3</sub><sup>-</sup>  
878 grown WT and WT + T plants at different time points. Line graph represents the  
879 average of five biological replicates  $\pm$  SEM.

880 (c) Bacterial number in log CFU in *Pst* infiltrated leaves of WT and WT+T plants at  
881 different time points. Column graph represents the average of three biological  
882 replicates  $\pm$  SEM.

883 (d) Relative *PR1* transcript levels from WT and WT+T plants at different time points.  
884 Data are average mean values  $\pm$  SE with n=3.

885 In all the experiments, statistical significance was tested by two-way ANOVA  
886 followed by Tukey's All-Pairwise Comparisons post-hoc test. The different letters  
887 above each column represent significance difference between means at  $p < 0.05$ .

888

889

890

891

892

**Fig. 2**

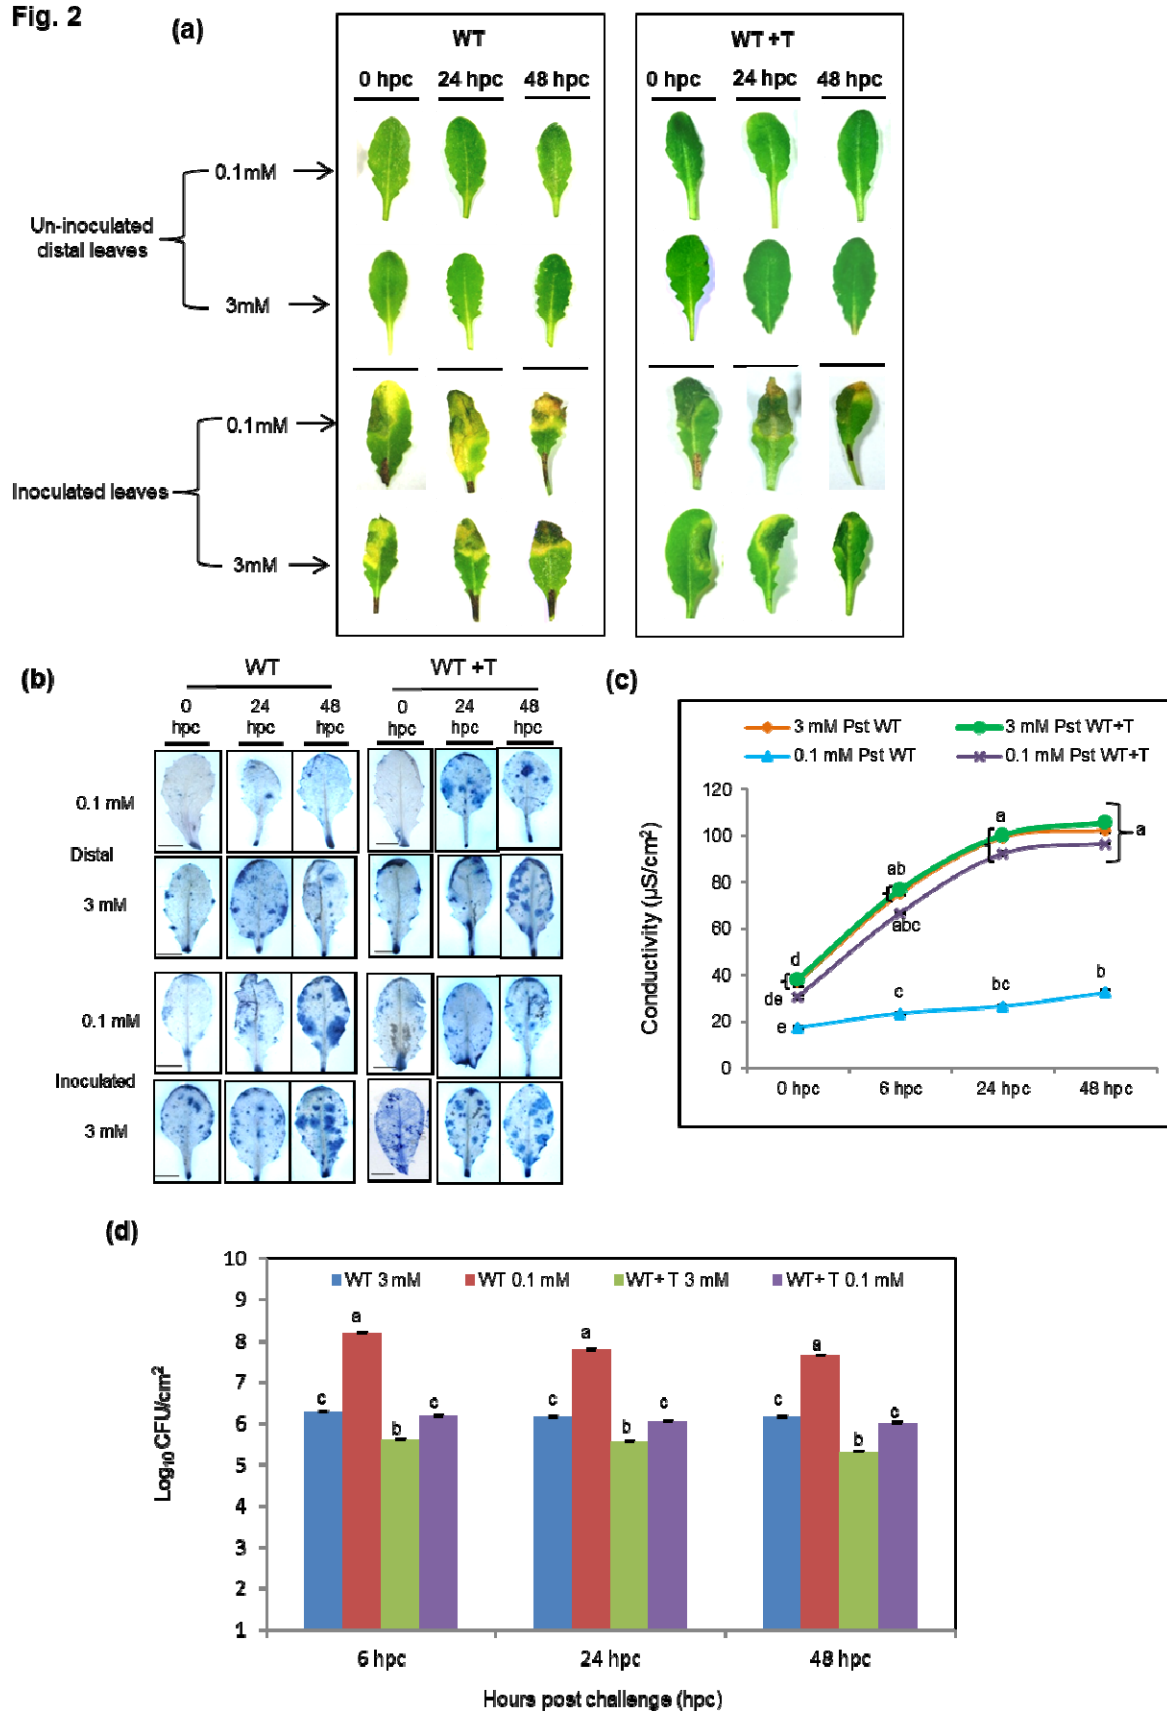

894 **Fig. 2. *Trichoderma* enhances SAR response in low nitrate grown WT plants**

895 SAR response shown by WT and WT+T plants grown in 0.1 mM and 3 mM  
896 nitrate nutrition were initially subjected to primary inoculation on one leaf per plant  
897 with *Pst*DC3000/avrRpm1, left for two days followed by secondary challenge  
898 inoculation with virulent *P. syringae* on 4 other (distal) leaves per plant, leaving 5-6  
899 healthy un-inoculated leaves per plant (Cameron et al. 1999). These plants are left  
900 for 3 days and then the Inoculated (I) and un-inoculated/distal (U) leaves were  
901 assayed for HR phenotype, Trypan blue imaging, EL pattern and bacterial count  
902 experiments. The uninoculated leaves from now is mentioned as distal leaves.

903 (a) HR phenotype post-secondary challenge in inoculated and uninoculated leaves  
904 of WT and WT+T plants at different time points in 0.1 mM and 3 mM  $\text{NO}_3^-$ .

905 (b) Histochemical staining using Trypan Blue for the detection of HR-mediated cell  
906 death post-secondary challenge in inoculated leaves of WT and WT+T plants at  
907 different time points in 0.1 mM and 3 mM  $\text{NO}_3^-$ . Images were observed under the 0.5  
908 X objective of AZ100 Stereo Microscope. Scale bar-1 mm.

909 (c) Electrolyte leakage observed post-secondary challenge in inoculated and  
910 uninoculated leaves of WT and WT+T plants at different time points in 0.1 mM and 3  
911 mM  $\text{NO}_3^-$ .

912 (d) Bacterial number in log CFU post-secondary challenge in inoculated leaves of  
913 WT and WT+T plants at different time points in 0.1 mM and 3 mM  $\text{NO}_3^-$ . Data are  
914 average mean values  $\pm$  SE with n=3. In all the experiments, statistical significance  
915 was tested by two-way ANOVA followed by Tukey's All-Pairwise Comparisons post-  
916 hoc test. The different letters above each column represent significance difference  
917 between means at  $p < 0.05$ .

918

919

920

921

922

Fig. 3

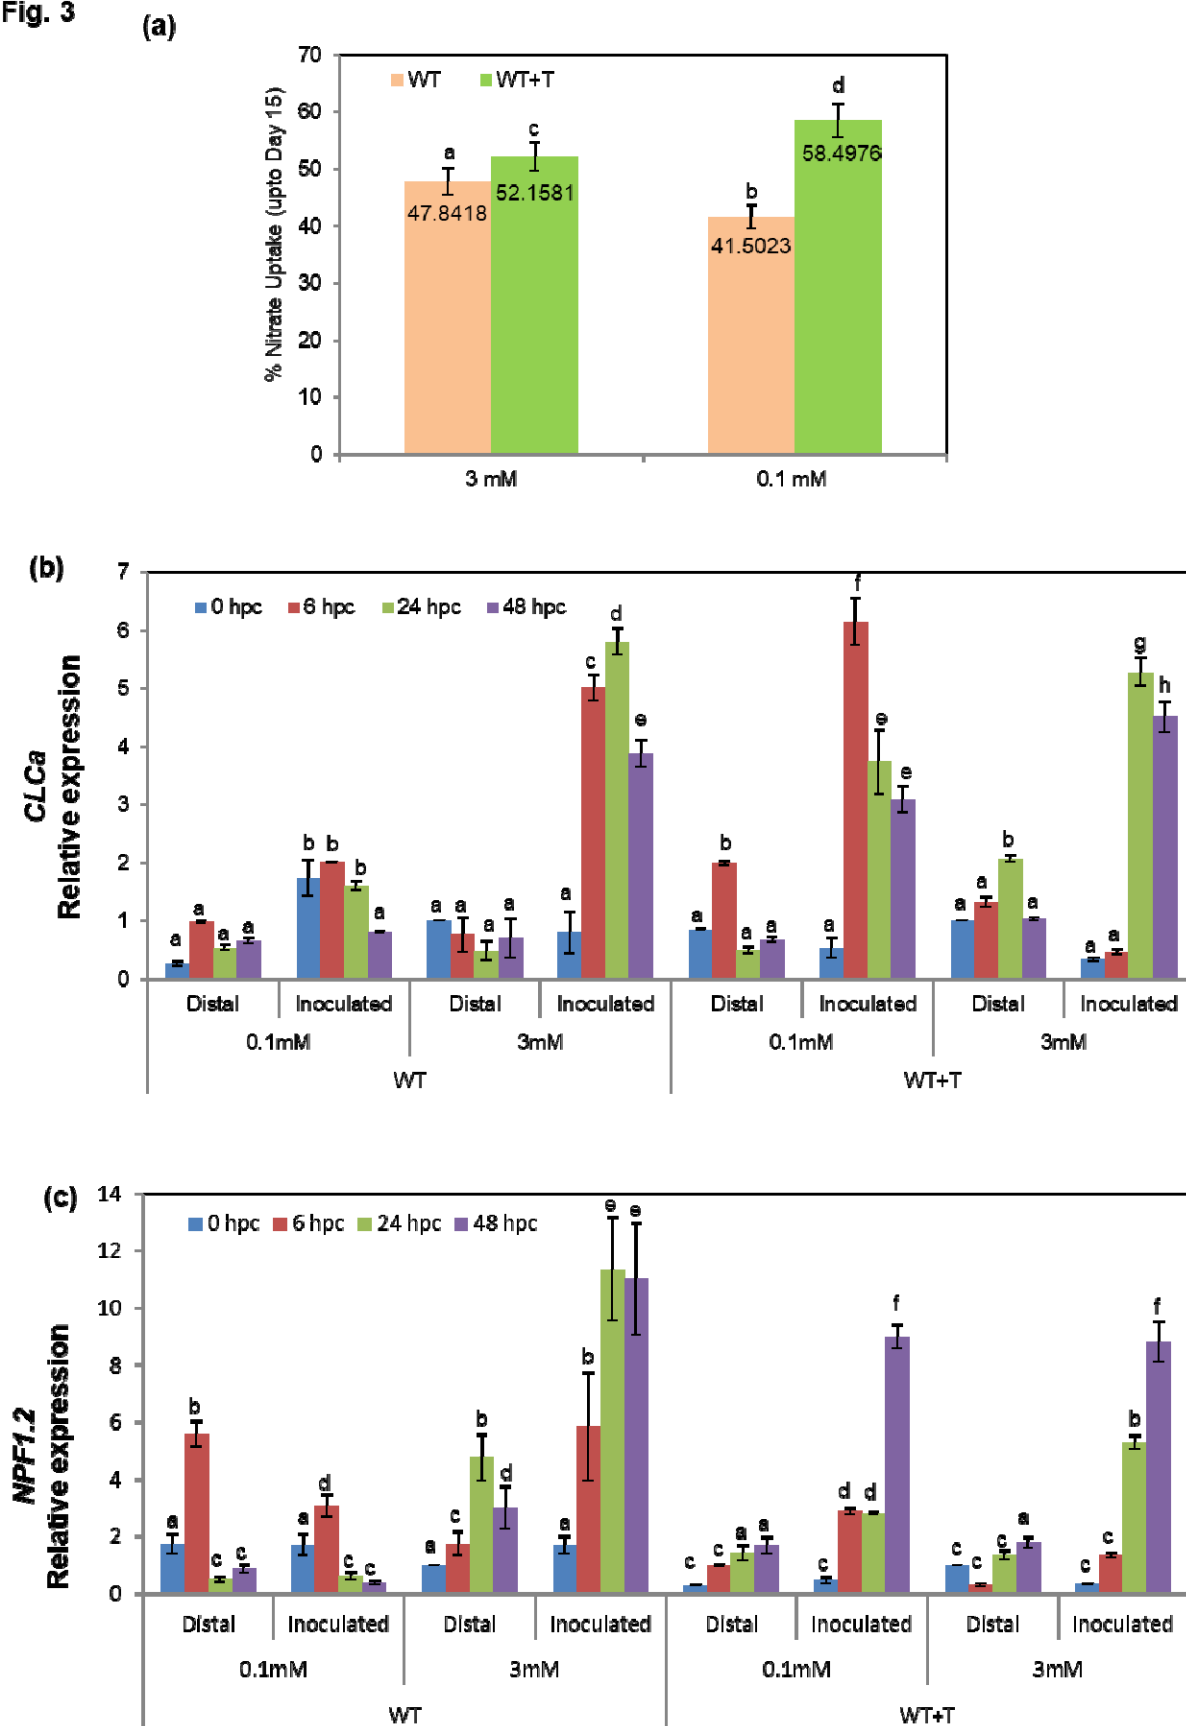

924 **Fig. 3: Nitrate uptake and expression analysis of low affinity nitrate**  
925 **transporters**

926 **(a)** Column graph represents the % nitrate levels utilized by the plants till 15th day  
927 from the initial day in 0.1 mM and 3 mM WT and WT+T leaves. Data are average  
928 mean values  $\pm$  SE with  $n=3$ . Statistical significance was tested by two-way ANOVA  
929 followed by Tukey's All-Pairwise Comparisons post-hoc test. The different letters  
930 above each column represent significance difference between means at  $p < 0.05$ .

931 **Expression profile of low affinity nitrate transporter genes (LATs) during SAR.**  
932 Relative expression of **(b)** *CLCA* gene in WT and WT+T plants and **(c)** *NPF1.2* gene  
933 in WT and WT+T plants grown under 0.1 mM and 3 mM  $\text{NO}_3^-$  concentration post  
934 secondary challenge in both inoculated and distal leaves. For all the target genes,  
935 fold expression values are means ( $n=3$ )  $\pm$  SE. Statistical significance was tested by  
936 two-way ANOVA followed by Tukey's All-Pairwise Comparisons post-hoc test. The  
937 different letters above each column represent significance difference between means  
938 at  $p < 0.05$ .

939

940

941

942

943

944

945

946

947

948

949

950

951

952

953

954

955

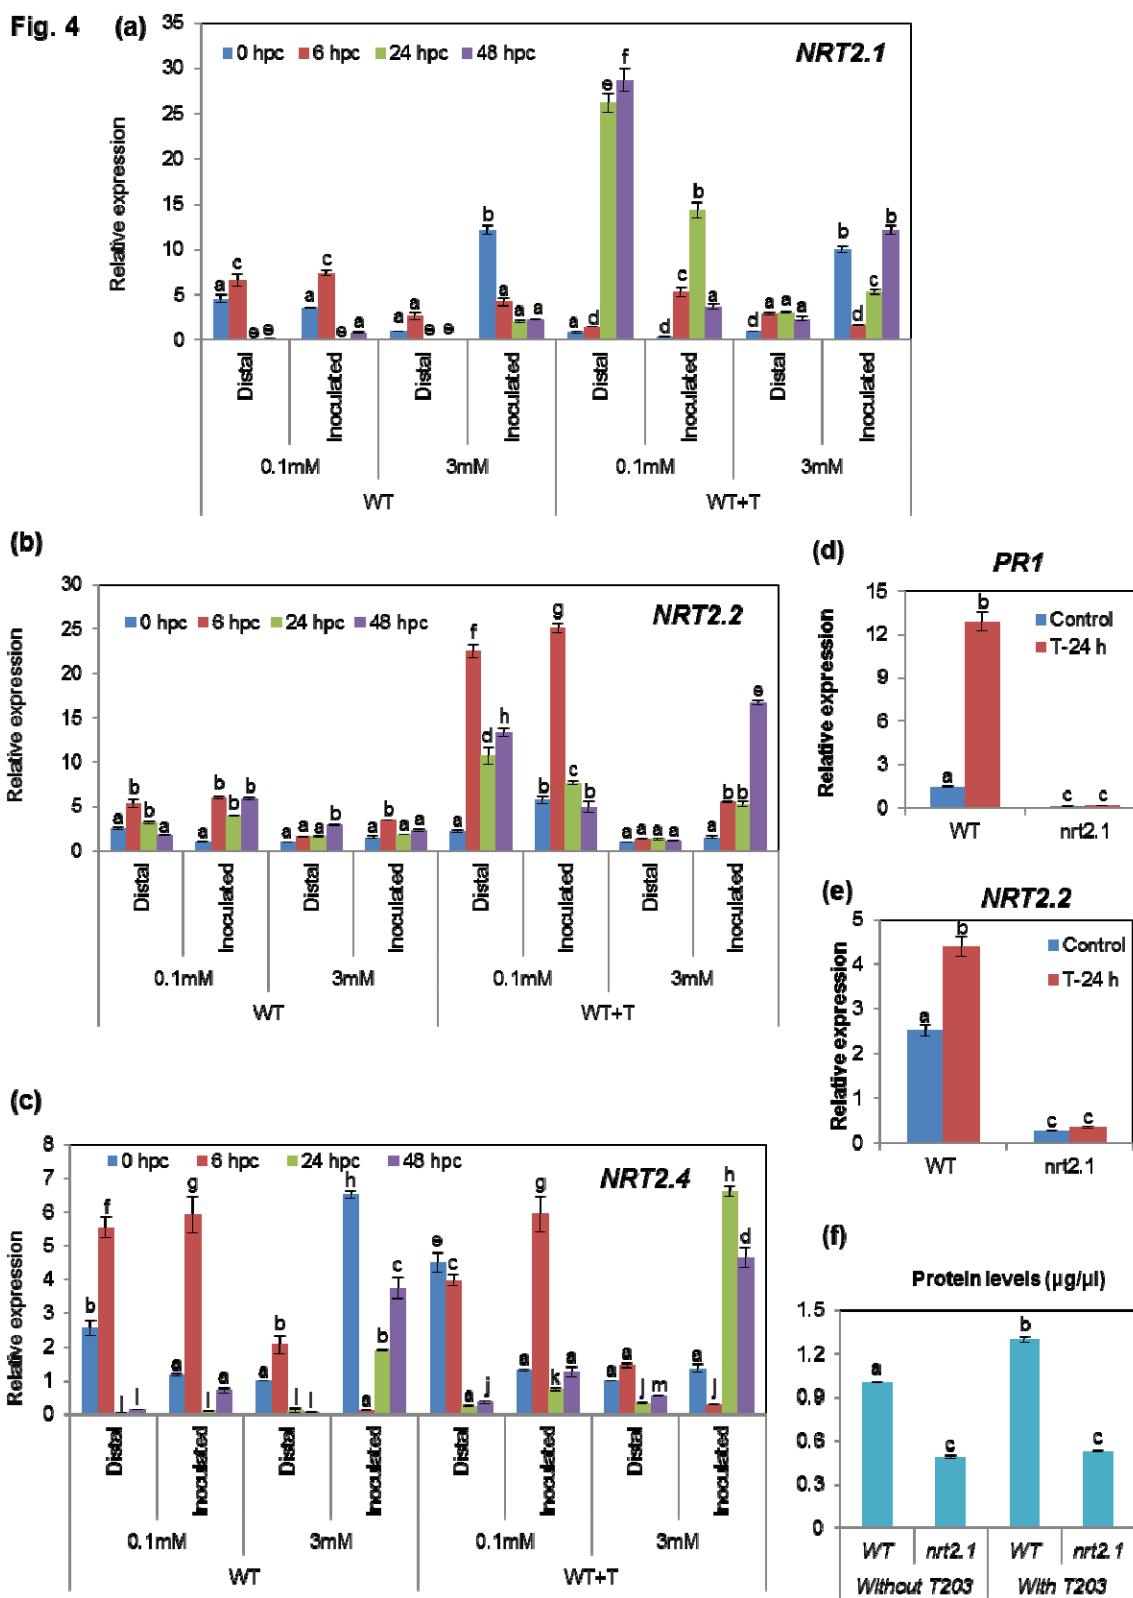

956

957

958 **Fig. 4: Expression profile of high affinity nitrate transporter genes (HATs)**  
959 **during SAR and response of genotypes (WT and *nrt2.1*) on priming effect of 24**  
960 **h *Trichoderma* pre-treatment w.r.t *PR1* and *NRT2.2* expression on low nitrate**  
961 **fed WT plants**

962 Relative expression of (a) *NRT2.1*, (b) *NRT2.2*, (c) *NRT2.4* in WT and WT+T plants  
963 grown under 0.1 mM and 3 mM NO<sub>3</sub><sup>-</sup> concentration post-secondary challenge in both  
964 inoculated and distal leaves. For all the target genes, fold expression values are  
965 means (n=3) ± SE. Statistical significance was tested by two-way ANOVA followed  
966 by Tukey's All-Pairwise Comparisons post-hoc test. The different letters above each  
967 column represent significance difference between means at p < 0.05.

968 (d) Relative *PR1* expression in roots of WT and *nrt2.1* plants grown under 0.1 mM  
969 NO<sub>3</sub><sup>-</sup> concentration (with and without *Trichoderma* treatment; 24 h). Data are average  
970 mean values ± SE with n=3. Statistical significance was tested by one-way ANOVA  
971 followed by Dunnett's multiple comparison test. The different letters above each  
972 column represent significance difference between means at p < 0.05.

973 (e) Relative *NRT2.2* expression in roots of WT and *nrt2.1* plants grown under 0.1  
974 mM NO<sub>3</sub><sup>-</sup> concentration (with and without *Trichoderma* treatment; 24h). Data are  
975 average mean values ± SE with n=3. Statistical significance was tested by one-way  
976 ANOVA followed by Dunnett's multiple comparison test. The different letters above  
977 each column represent significance difference between means at p < 0.05.

978 (f) Protein levels in WT and *nrt2.1* plants grown under 0.1 mM NO<sub>3</sub><sup>-</sup> concentration in  
979 the presence or absence of *Trichoderma*. Data are average mean values ± SE with  
980 n=3. Statistical significance was tested by one-way ANOVA followed by Dunnett's  
981 multiple comparison test. The different letters above each column represent  
982 significance difference between means at p < 0.05.

983

984

985



Fig. 5

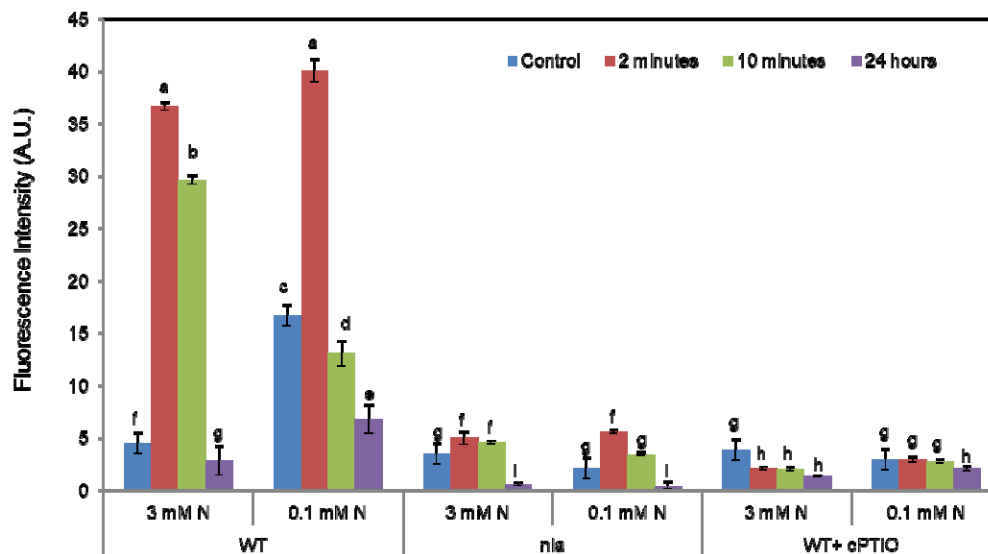

986

987 **Fig. 5: Visualization of nitric oxide by diaminofluorescein (DAF) fluorescence**

988 Nitric oxide estimation by diaminofluorescein (DAF-FM) fluorescence under 0.1 and  
989 3 mM NO<sub>3</sub><sup>-</sup> concentration in WT, *nia1,2* and cPTIO (100 μM) grown WT plants during  
990 different periods of *Trichoderma* inoculation. The experiment was performed three  
991 times independently with similar results. Data are average mean values ± SE with  
992 n=3. Statistical significance was tested by two-way ANOVA followed by Tukey's All-  
993 Pairwise Comparisons post-hoc test. The different letters above each column  
994 represent significance difference between means at p < 0.05.

995

996

997

998

999

1000

1001

**Fig. 6 (a)**

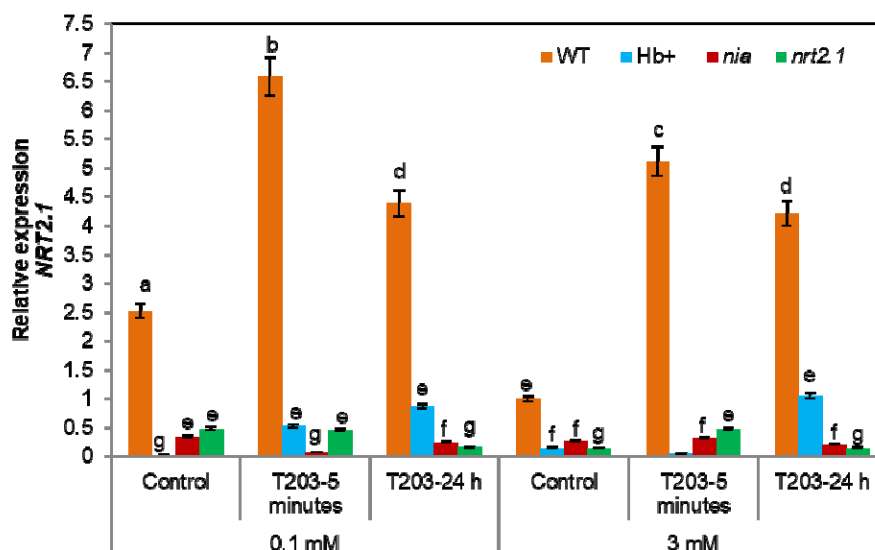

**(b)**

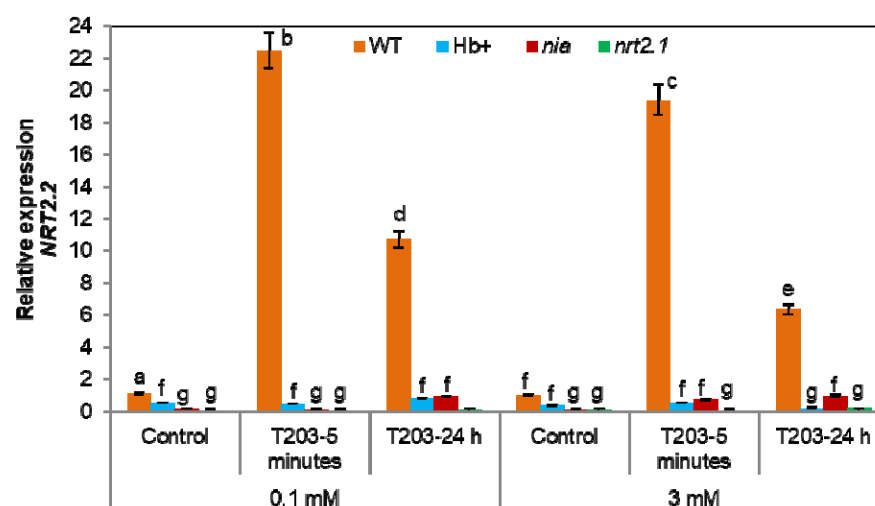

**(c)**

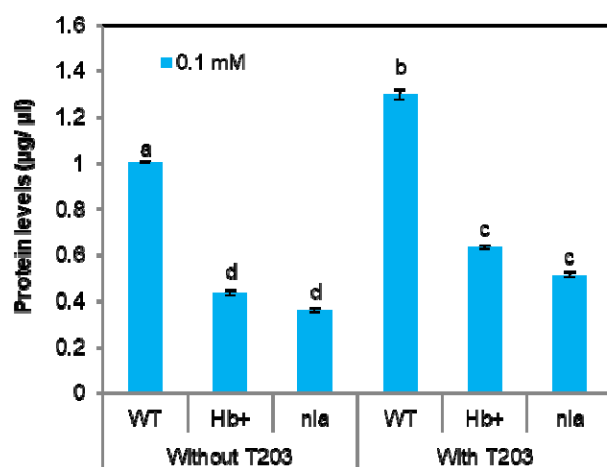

**(d)**

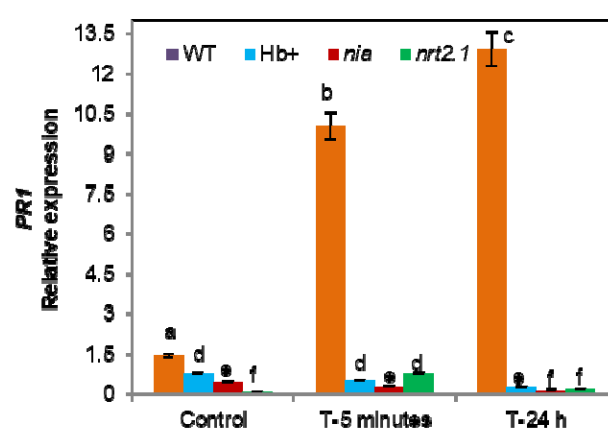

1003 **Fig. 6: Response of the genotypes during early stages of *Trichoderma***  
1004 **inoculation on *NRT2.1*, *NRT2.2* expression, protein levels and *PR1* expression**

1005 (a) Relative *NRT2.1* expression in roots of WT, Hb<sup>+</sup>, *nia1,2* and *nrt2.1* plants grown  
1006 under 0.1 mM and 3 mM NO<sub>3</sub><sup>-</sup> concentration, with and without *Trichoderma*  
1007 treatment, given for 5 minutes and 24 h to the plants. Data are average mean values  
1008 ± SE with n=3. Statistical significance was tested by two-way ANOVA followed by  
1009 Tukey's All-Pairwise Comparisons post-hoc test. The different letters above each  
1010 column represent significance difference between means at p < 0.05.

1011 (b) Relative *NRT2.2* expression in roots of WT, Hb<sup>+</sup>, *nia1,2* and *nrt2.1* plants grown  
1012 under 0.1 mM and 3 mM NO<sub>3</sub><sup>-</sup> concentration, with and without *Trichoderma*  
1013 treatment, given for 5 minutes and 24 h to the plants. Data are average mean values  
1014 ± SE with n=3. Statistical significance was tested by two-way ANOVA followed by  
1015 Tukey's All-Pairwise Comparisons post-hoc test. The different letters above each  
1016 column represent significance difference between means at p < 0.05.

1017 (c) Protein levels measured in WT, Hb<sup>+</sup> and *nia1,2* seedlings grown under 0.1 mM  
1018 NO<sub>3</sub><sup>-</sup> for 15 days in vertical plates using Bradford's assay. *Trichoderma* treatment  
1019 was given for 24 h to the plants. Data are average mean values ± SE with n=3.  
1020 Statistical significance was tested by one-way ANOVA followed by Dunnett's multiple  
1021 comparison test. The different letters above each column represent significance  
1022 difference between means at p < 0.05.

1023 (d) *PR1* gene expression in WT, Hb<sup>+</sup>, *nia1,2* and *nrt2.1* plants under 0.1 mM NO<sub>3</sub><sup>-</sup>  
1024 plants, with and without *Trichoderma* treatment, given for 5 minutes and 24 h to the  
1025 plants. Data are average mean values ± SE with n=3. Statistical significance was  
1026 tested by two-way ANOVA followed by Tukey's All-Pairwise Comparisons post-hoc  
1027 test. The different letters above each column represent significance difference  
1028 between means at p < 0.05.

1029

1030

1031

1032

Fig. 7

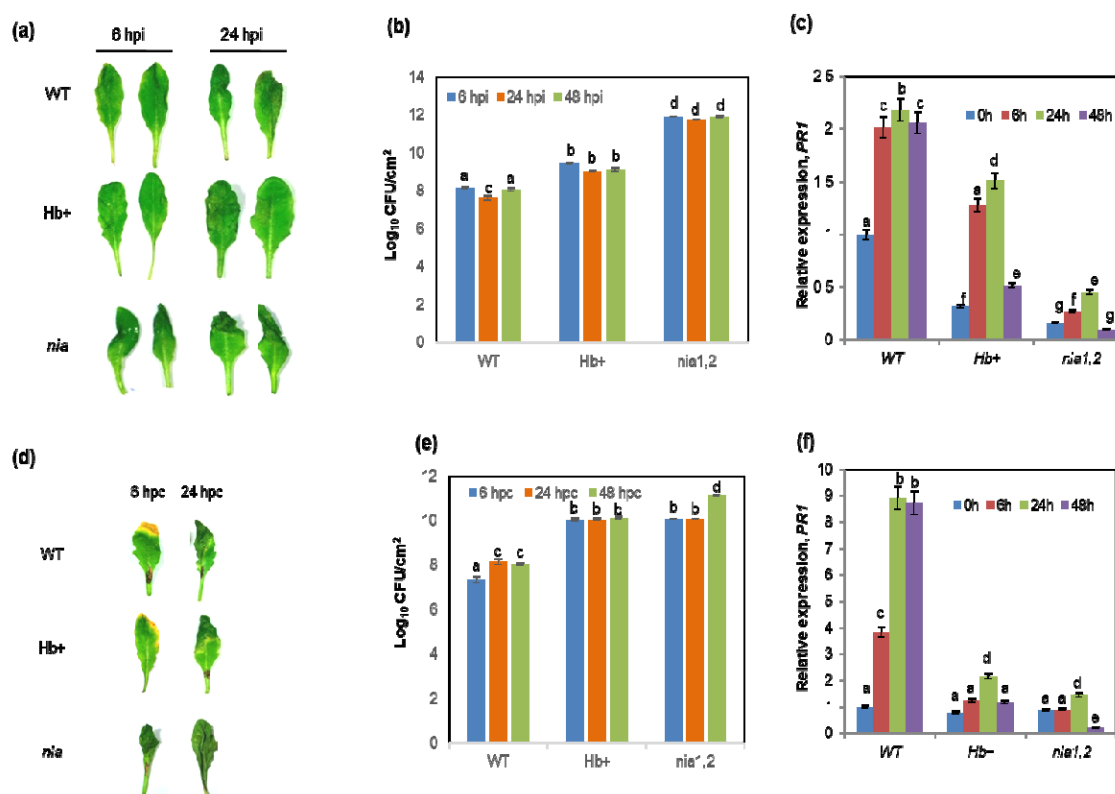

1033

1034 **Fig. 7: Response of WT and NO mutants (Hb<sup>+</sup> lines and *nia1,2*) grown under 0.1**  
 1035 **mM NO<sub>3</sub><sup>-</sup> during LAR and SAR**

1036 In LAR response (a) HR phenotype in inoculated leaves of WT, Hb<sup>+</sup> and *nia1,2*  
 1037 plants grown under 0.1 mM NO<sub>3</sub><sup>-</sup> concentration at 0 and 24 hpi .

1038 (b) In planta bacterial growth (log CFU) at 6, 24 and 48 hpi. Data are average mean  
 1039 values ± SE with n=3. Statistical significance was tested by one-way ANOVA  
 1040 followed by Dunnett's multiple comparison test. The different letters above each  
 1041 column represent significance difference between means at p < 0.05.

1042 (c) Relative *PR1* expression in infiltrated leaves during localized infiltration. Data are  
 1043 average mean values ± SE with n=3. Statistical significance was tested by two-way  
 1044 ANOVA followed by Tukey's All-Pairwise Comparisons post-hoc test. The different  
 1045 letters above each column represent significance difference between means at  
 1046 p < 0.05.

1047 In SAR response (d) HR phenotype in inoculated and uninoculated leaves of WT,  
1048 Hb<sup>+</sup> and *nia1,2* plants grown under 0.1 mM NO<sub>3</sub><sup>-</sup> concentration at 0 and 24 hours  
1049 post secondary challenge

1050 (e) Bacterial population represented by log CFU at 6, 24 and 48 hpc. Data are  
1051 average mean values ± SE with n=3. Statistical significance was tested by one-way  
1052 ANOVA followed by Dunnett's multiple comparison test. The different letters above  
1053 each column represent significance difference between means at  $p \leq 0.05$ .

1054 (f) Relative *PR1* gene expression in infiltrated leaves post secondary challenge. Data  
1055 are average mean values ± SE with n=3. Statistical significance was tested by two-  
1056 way ANOVA followed by Tukey's All-Pairwise Comparisons post-hoc test. The  
1057 different letters above each column represent significance difference between means  
1058 at  $p \leq 0.05$ .

1059

1060

1061

1062

1063

1064

1065

1066

1067

1068

1069

1070

1071

1072

**Fig. 8**

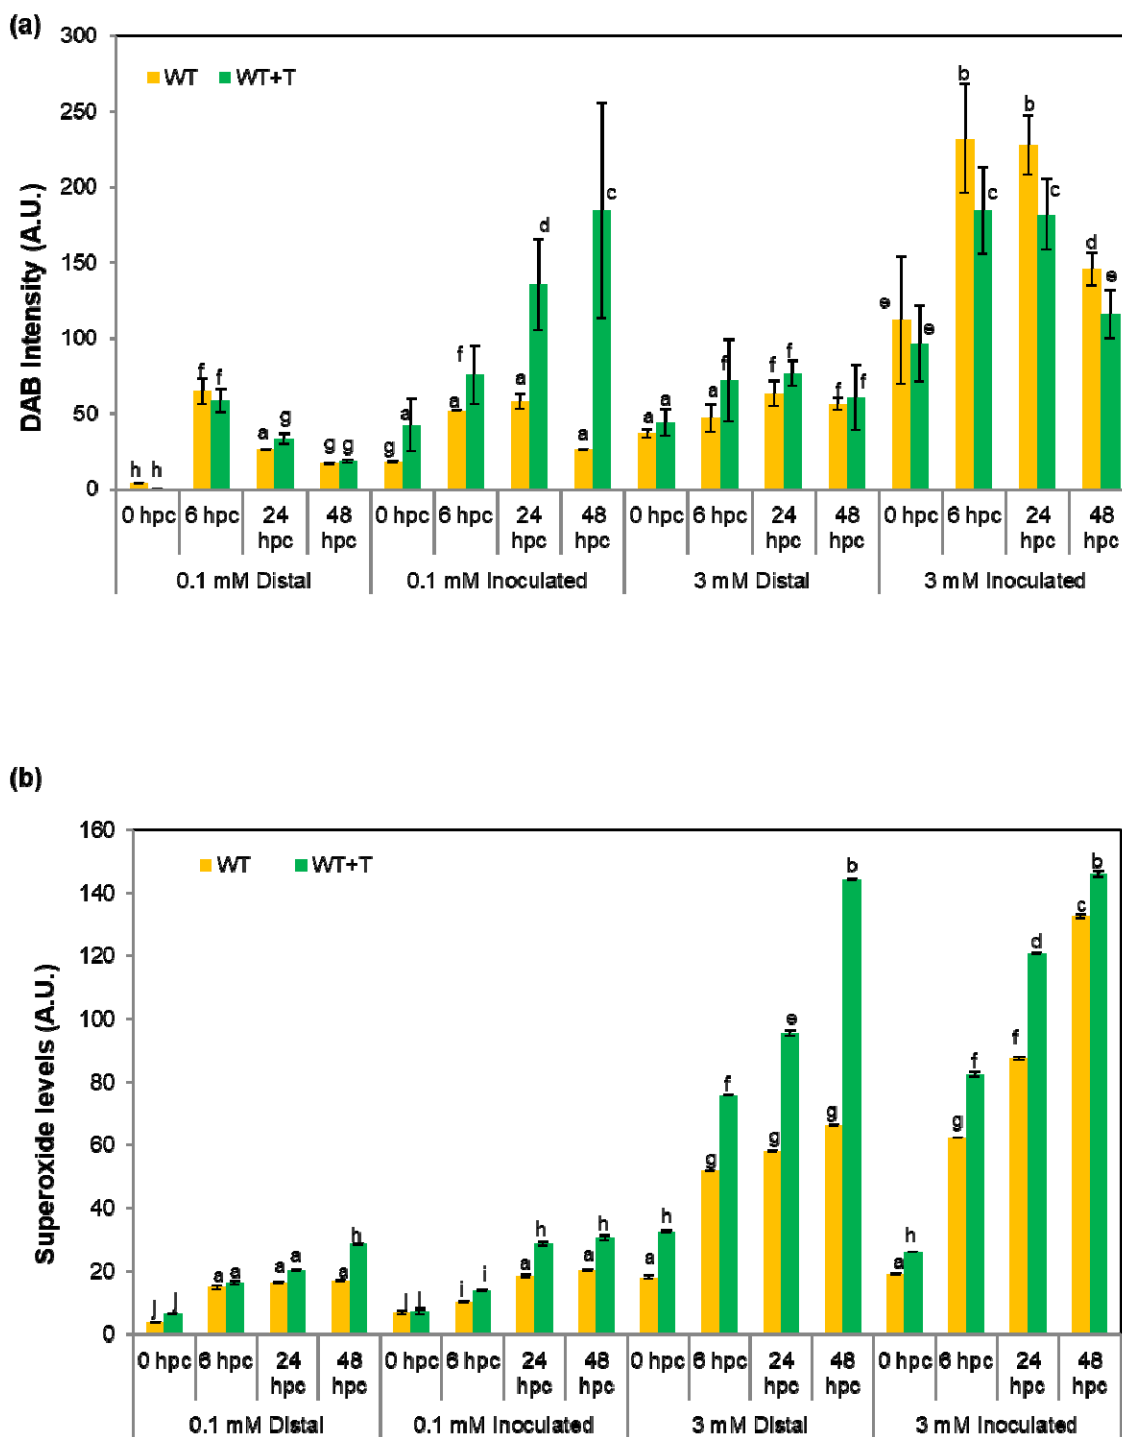

1073

1074 **Fig. 8: Detection of ROS by measuring  $H_2O_2$  and  $O_2^{\cdot -}$  in 0.1 mM and 3 mM  $NO_3^-$**   
 1075 **WT and *Trichoderma* grown WT plants during SAR response**

1076 (a) Quantification of DAB staining used to measure H<sub>2</sub>O<sub>2</sub> levels in the inoculated  
1077 leaves and distal leaves post challenge inoculation at 0, 6, 24 and 48 hpc is shown  
1078 as intensity per stained area from ten leaves per treatment measured using ImageJ  
1079 in arbitrary units with the mean values  $\pm$  SE. Column graph represents the DAB  
1080 intensity calculated as stained leaf area compared with the total surface of leaf  
1081 analyzed in terms of % stained area upon the % control area by ImageJ (ver 3.2).  
1082 The control leaves were completely decolorized using bleaching agent and then the  
1083 area was measured using ImageJ and % was calculated with total area and the  
1084 result obtained was termed % control area. Statistical significance was tested by  
1085 two-way ANOVA followed by Tukey's All-Pairwise Comparisons post-hoc test. The  
1086 different letters above each column represent significance difference between means  
1087 at  $p < 0.05$ .

1088 (b) Quantification of NBT staining used to measure O<sub>2</sub><sup>·-</sup> levels in the inoculated  
1089 leaves and distal leaves post challenge inoculation at 0, 6, 24 and 48 hpc shown as  
1090 intensity per stained area from ten leaves per treatment measured using ImageJ in  
1091 arbitrary units with the mean values  $\pm$  SE. Similar method was used to measure %  
1092 stained area for NBT stained images w.r.t control leaves. Statistical significance was  
1093 tested by two-way ANOVA followed by Tukey's All-Pairwise Comparisons post-hoc  
1094 test. The different letters above each column represent significance difference  
1095 between means at  $p < 0.05$ .

1096

1097

1098

1099

1100

1101

1102

1103

1104



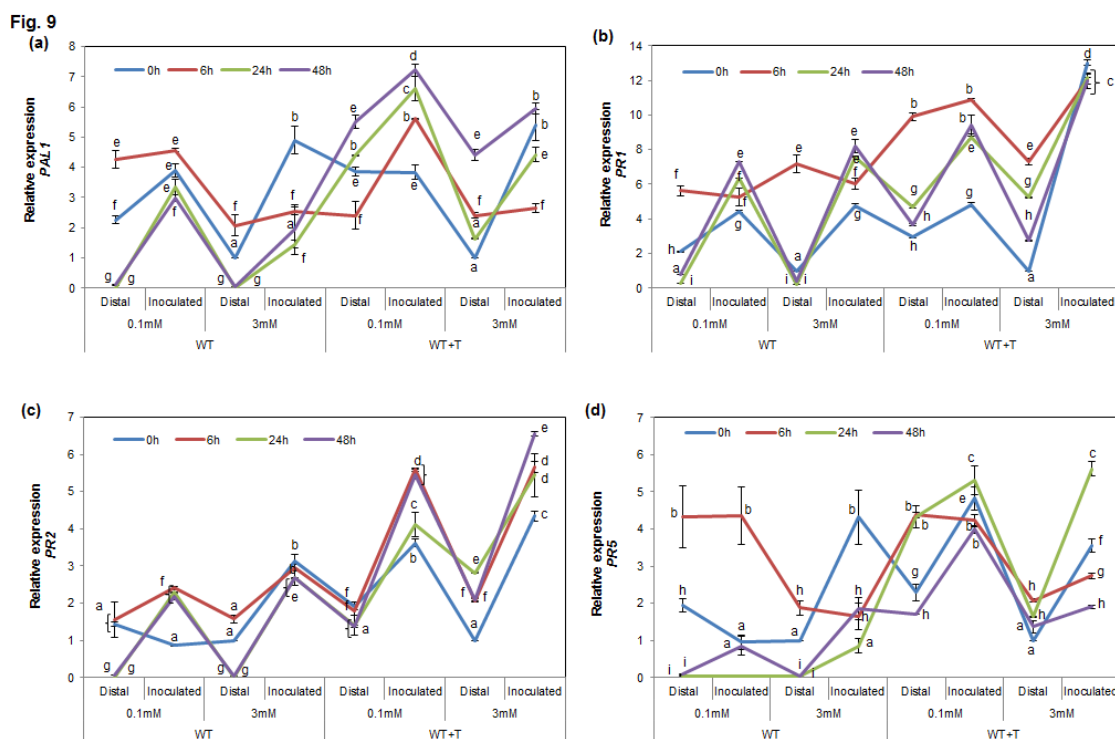

1105

1106 **Fig. 9: Expression profiles of defense related genes during SAR**

1107 Relative expression of defense related genes in WT and WT+T grown under low (0.1  
 1108 mM) and optimum (3 mM)  $\text{NO}_3^-$  concentration post-secondary challenge of  
 1109 *Pst*DC3000 in both inoculated and distal leaves (a) Relative expression of *PAL1* (b)  
 1110 *PR1* (c) *PR2* (d) *PR5*. For all the target genes, fold expression values are means  
 1111 ( $n=3$ )  $\pm$  SE. Statistical significance was tested by two-way ANOVA followed by  
 1112 Tukey's All-Pairwise Comparisons post-hoc test. The different letters above each  
 1113 column represent significance difference between means at  $p < 0.05$ .

1114

1115

1116

1117

1118

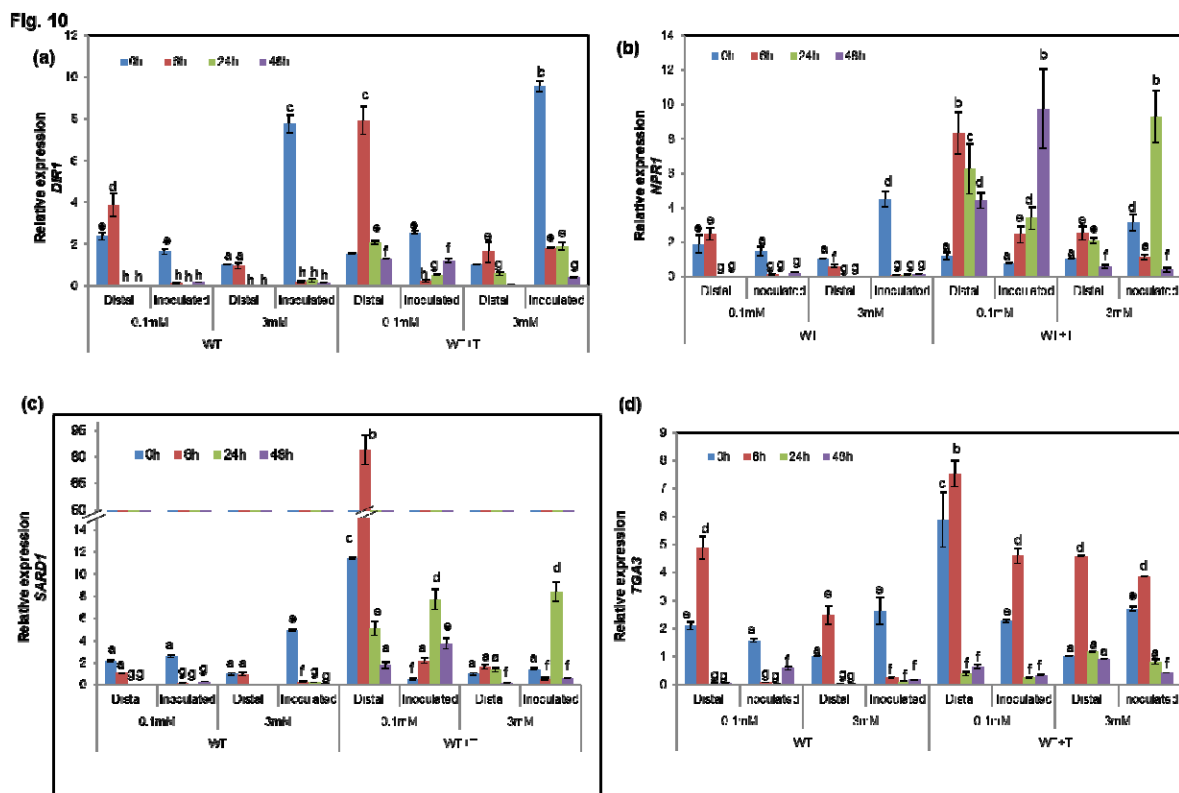

1119

1120 **Fig. 10: Expression profiles of regulatory SAR genes**

1121 Relative expression of SAR regulatory gene in WT and WT+T grown under low (0.1  
 1122 mM) and optimum (3 mM) NO<sub>3</sub><sup>-</sup> concentration post-secondary challenge of  
 1123 *PstDC3000* in both inoculated and distal leaves. Relative expression of (a) *DIR1* (b)  
 1124 *NPR1* (c) *SARD1* (d) *TGA3*. For all the target genes, fold expression values are  
 1125 means (n=3) ± SE. Statistical significance was tested by two-way ANOVA followed  
 1126 by Tukey's All-Pairwise Comparisons post-hoc test. The different letters above each  
 1127 column represent significance difference between means at p < 0.05.

1128

1129

1130

1131

1132

1133

Fig. 11

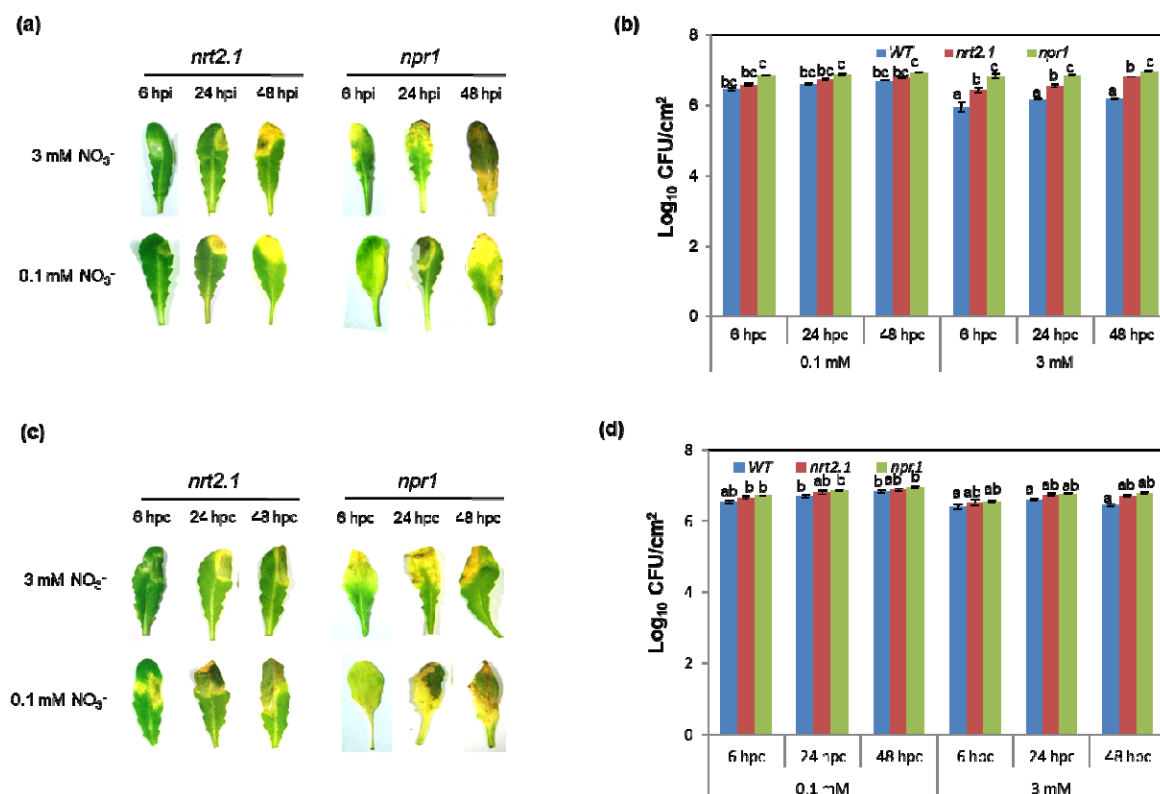

1134

1135 **Fig. 11: LAR and SAR response in *nrt2.1* and *npr1* mutants to virulent *Pst***  
 1136 **DC3000**

1137 (a) LAR disease symptoms to virulent *Pst* DC3000 in *nrt2.1* and *npr1* mutant in 0.1  
 1138 and 3 mM nitrate (b) Bacterial growth in WT, *nrt2.1* and *npr1* mutant (c) Phenotype  
 1139 during SAR response in *nrt2.1* and *npr1* mutant in 0.1 and 3 mM nitrate (d) Bacterial  
 1140 growth in WT, *nrt2.1* and *npr1* mutant during SAR response.

1141

1142

1143

1144

1145

1146

Fig. 12

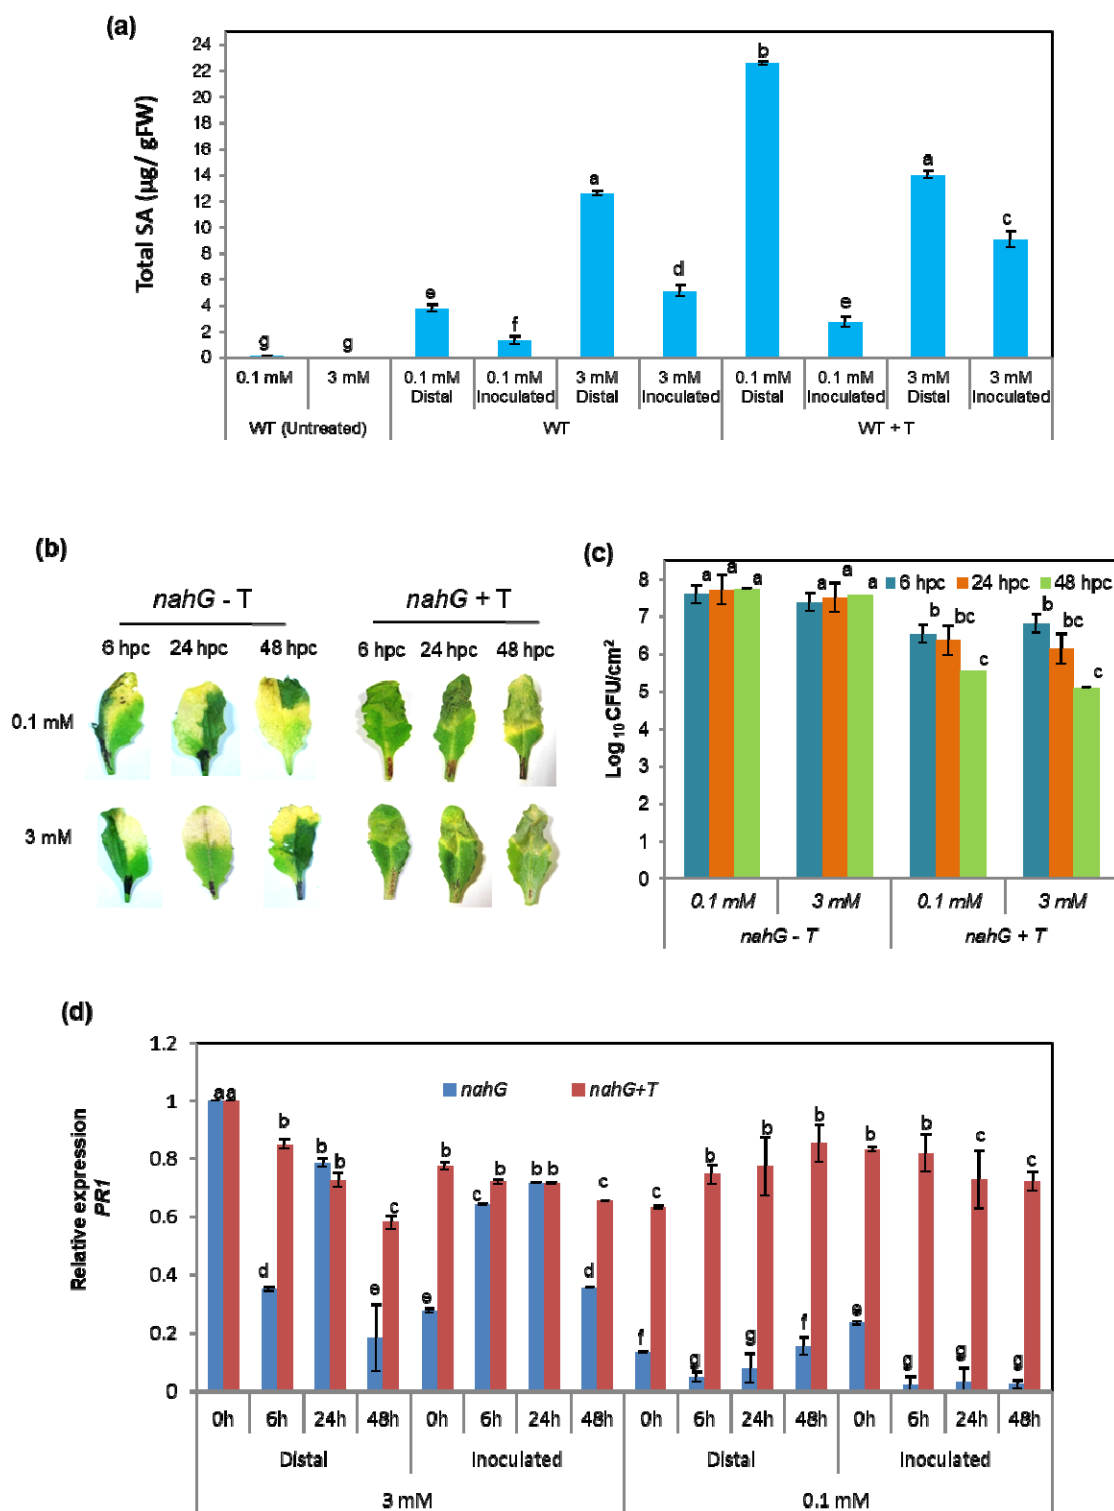

1147

1148 Fig. 12: SA Accumulation during SAR, and response of *nahG* in the presence  
 1149 and absence of *Trichoderma* during SAR

1150 (a) Total SA levels ( $\mu\text{g g}^{-1}$  fresh weight) were determined in untreated WT leaves  
1151 (without *Trichoderma* and *Pst* treatment) and in inoculated and distal leaves of 0.1  
1152 mM and 3 mM nitrate- fed WT plants post challenge inoculation (24 hpc) with and  
1153 without *Trichoderma*. Data are average mean values  $\pm$  SE with  $n=3$ . Statistical  
1154 significance was tested by two-way ANOVA followed by Tukey's All-Pairwise  
1155 Comparisons post-hoc test. The different letters above each column represent  
1156 significance difference between means at  $p < 0.05$ .

1157 (b) HR phenotype in inoculated and un-inoculated distal leaves of *nahg* mutants  
1158 grown under 0.1 and 3 mM nitrate concentration post-secondary challenge at 6, 24  
1159 and 48 hpc (c) Bacterial number represented by log CFU at 6, 24 and 48 hpc from  
1160 the inoculated leaves post secondary challenge

1161 (d) *PR1* gene expression in inoculated and uninoculated leaves of *nahG* mutants  
1162 grown under 0.1 and 3 mM nitrate, with and without *Trichoderma* treatment post-  
1163 secondary challenge. Data are average mean values  $\pm$  SE with  $n=3$ . Statistical  
1164 significance was tested by two-way ANOVA followed by Tukey's All-Pairwise  
1165 Comparisons post-hoc test. The different letters above each column represent  
1166 significance difference between means at  $p < 0.05$ .

1167

1168

1169

1170

1171

1172

1173

1174

1175

1176

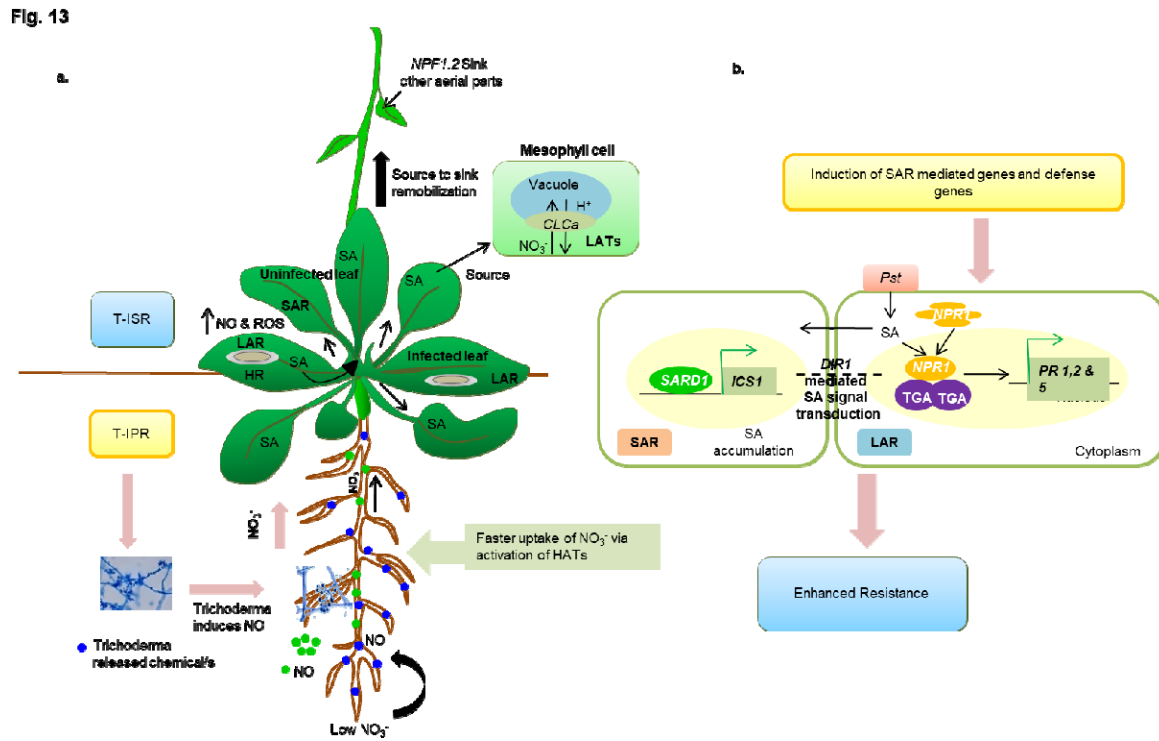

1177

1178 **Fig. 13: A model depicting mechanism of *Trichoderma* induced systemic**  
 1179 **response (T-ISR) under low nitrate conditions during pathogen infection in**  
 1180 ***Arabidopsis***

1181 (a) After root colonization, *Trichoderma* secretes growth promoting elicitors (blue  
 1182 dots), and induces priming response (T-IPR) by eliciting short term nitric oxide (NO;  
 1183 green dots) which facilitate faster nitrate uptake by activating HATs (*NRT2.1*, *2.2* and  
 1184 *2.4*) in the roots. The HATs in turn activates the vacuolar LATs (*CLCa* and *NPF1.2*)  
 1185 in the mesophyll cells allows source to sink re-mobilization of available nitrate from  
 1186 roots to other aerial parts. During primary inoculation (local pathogen attack;  
 1187 *avrRpm1*), NO and ROS signals both are produced during hypersensitive response  
 1188 (HR), along with salicylic acid (SA), but their basal levels are greatly enhanced due  
 1189 to *Trichoderma* treatment. Moreover, the *Trichoderma* induced short term NO  
 1190 produced during priming and HR, plays a role in faster nitrate uptake by the HATs in  
 1191 low N stress plants. *Trichoderma* induced SA (produced during local infection) gets  
 1192 rapidly translocated to the other uninfected distal parts of the plant and pre-programs  
 1193 the stressed plant for subsequent pathogen attack.

1194 (b) *Trichoderma* activates PR proteins and cause SA accumulation in locally infected  
 1195 leaves during T-ISR. These signals are transported to the other part of the plant by

1196 activating a set of regulatory genes (*DIR1*, *NPR1*, *SARD1*, *TGA3*) involved in SAR  
1197 response. The SA signal transduction mediated by *DIR1* *NPR1* and *TGA3* was  
1198 evidenced by their induced expression in systemic leaves in the presence of  
1199 *Trichoderma*. Moreover, induced *SARD1* expression activates the SA biosynthetic  
1200 genes (*ICS1*) in the systemic leaves. All these genes are involved in translocating  
1201 these signals from locally infected leaf to the uninfected parts of the plant.  
1202 Consequently, *Trichoderma* helps in the accumulation of PR proteins and SA in the  
1203 uninfected leaves, thus allowing the low nitrate stress plants to show enhanced  
1204 resistance.

1205 Supplementary/Supporting Information

1206 Figure Legends of Supplementary files:

1207 **Fig. S1:** Phenotype of plants grown in different nitrate nutrition pre- and post-  
1208 challenge inoculation **(a)** The growth pattern and phenotype of WT and *Trichoderma*  
1209 treated WT plants in 3 mM and 0.1 mM NO<sub>3</sub><sup>-</sup> nutrition; **(b)** Effect of post-secondary  
1210 challenge on plant phenotype, 1<sup>o</sup>- primary inoculation, 2<sup>o</sup>-secondary challenge and  
1211 D-Distal leaves; **(c)** Hyponastic response (petiole elongation) shown by 0.1 mM and  
1212 3 mM NO<sub>3</sub><sup>-</sup> plants after primary inoculation.

1213 **Fig. S2:** Electrolyte leakage of mock plants and morphological growth parameters  
1214 during SAR **(a)** Electrolyte leakage from mock infiltrated plants in SAR;  
1215 Morphological growth parameters observed in WT and treated WT plants; **(b)** Leaf  
1216 number; **(c)** Biomass measured as fresh weight (FW); **(d)** Total chlorophyll content in  
1217 *Pst* treated and untreated plants.

1218 **Fig. S3:** Experimental design of LAR and SAR assay

1219 **(a)** Description of plant samples taken for study and description of plants in absolute  
1220 control, control and treatment. The sample size for each pot described here is n= 20-  
1221 25 and plant's age was 30 days old.

1222 **(b)** In LAR assay, there were two sets of experiments performed at the same time.  
1223 Set 1 comprised of mock infiltrated plants, most of the healthy leaves of the plants  
1224 are syringe infiltrated by 10 mM MgCl<sub>2</sub>. Set 2 comprised of pathogen infiltrated  
1225 plants, most of the healthy leaves were syringe infiltrated by avirulent *Pst*DC3000.  
1226 The plants were left to acclimatize for 1 hour and then sample collection was  
1227 performed at 0, 6, 24 and 48 hours post inoculation (hpi). Lowermost bar also shows



1228 the age of the plant during the experiment. All the infections were performed in  
1229 infection room under standard conditions.

1230 (c) In SAR assay, there were two sets of experiments performed at the same time.  
1231 Set 1 comprised of plants initially infiltrated with primary inoculation of avirulent  
1232 (*Pst*DC3000;*avrRpm1*) and then secondary or challenge inoculation with virulent  
1233 *Pst*DC3000. Set 2 comprised of mock infiltrated plants with both primary and  
1234 secondary inoculation with 10 mM MgCl<sub>2</sub>. The incubation time for each inoculation is  
1235 described in the figure. The time of primary and secondary inoculation was same  
1236 (i.e. 10 am) and time selected for sampling is after the completion of incubation of  
1237 challenge inoculation. The samples were collected after completing 3 days of  
1238 challenge inoculation are denoted as 0 (10 am), 6 (4 pm), 24 (10 am next day) and  
1239 48 (10 am next to next day) hours post challenge (hpc).

1240 Fig. S4 Experimental design and methodology of nitrate determination.

1241 (a) Schematic representation of nitrate determination experimental design is  
1242 shown here. First, the nitrate levels were determined in absolute control and soilrite:  
1243 agropeat mix (with and without *Trichoderma*) according to Hachiya and Okamoto,  
1244 2017. 1 g of these S: A mixes were taken in 50 ml centrifuge tubes and immediately  
1245 added pre-heated 10 ml of ultrapure water. Heat will denature nitrate reductase  
1246 present in S: A mix and will be unable to utilize available nitrate in the substrate.  
1247 Gently vortexed the tubes and kept at 100°C water bath and shaken every 5  
1248 minutes. After incubation, allowed the samples to cool down and settle down  
1249 completely. Decanted the supernatant in another fresh tube. Centrifuged at  
1250 maximum speed for 20 minutes at RT. Gently removed the clear supernatant and  
1251 measured nitrate according to assay described in Hachiya and Okamoto (2017).

1252 (b) Nitrate uptake assay was evaluated in rosette leaves of WT and WT+T plants  
1253 (with and without *Trichoderma*) in a day-wise set up and percent nitrate uptake up to  
1254 Day 15 is calculated. The trays containing pots were bottom irrigated with 0.1 mM  
1255 and 3 mM nitrate nutrient Hoagland's solution, allowed the pots to soak the entire  
1256 nutrient solution for 2 hours and excess nutrient solution was drained off by pressing  
1257 the S: A mixture. The leaves were sampled from Day 0 till Day 15 (even days) for  
1258 nitrate uptake assay in the same set of plants (one leaf from each pot each day of  
1259 sampling). During this period, nutrient was not supplied to the plants, they were only  
1260 watered to ensure no drying of the S: A mixture and cause no drought to plants. A  
1261 separate set of 6 pots of WT rosettes (absolute control) was also kept for calibrating

1262 the basal levels of nitrate present in leaves without flooding with 0.1 or 3 mM nitrate  
1263 solution. The nitrate levels (leaves) obtained from this absolute control were  
1264 subtracted from the nitrate treated pots. Each day-wise nitrate levels were calculated  
1265 by subtracting the values of Day 2, 4, 6, 8, 10, 12 and 15 from Day 0 nitrate levels  
1266 and subsequently % nitrate uptake was evaluated, shown in Fig. 3(a).

1267 (c) Nitrate levels were also determined in 1 g of soilrite: agropeat mixture (blue  
1268 bar), 0.1 mM fed S: A mix (light orange bar), 3 mM fed S: A mix (light green bar), 0.1  
1269 mM fed S: A mix with *Trichoderma* (light purple bar) and 3 mM fed S: A mix with  
1270 *Trichoderma* (yellow bar). Data are average mean values  $\pm$  SE with n=3. Statistical  
1271 significance was tested by one-way ANOVA followed by Dunnett's multiple  
1272 comparison test. The different letters above each column represent significance  
1273 difference between means at  $p < 0.05$ .

1274 (d) Standard curve of potassium nitrate used to calculate apparent nitrate  
1275 concentration. Nitrate standard series of 2, 4, 6, 8, 10 and 12 mM were prepared and  
1276 assay was performed according to Hachiya and Okamoto, (2017). A straight line  
1277 curve generated was used to determine the nitrate concentration (mM) using the  
1278 formula = Abs/0.055, where 0.055 is the value according to straight line curve.

1279 **Fig S5: (a)** Electrolyte leakage in distal leaves in WT and WT+T leaves during SAR  
1280 **(b)** % cell death quantified in Trypan blue images of both inoculated (Pst) and  
1281 uninoculated (distal) leaves in WT and WT+T leaves during SAR using ImageJ.  
1282 Results are presented as % necrotized leaf area compared with the total surface of  
1283 leaf analyzed by ImageJ (ver 3.2) and represent means  $\pm$  SE of 6 leaves per  
1284 treatment.

1285 **Table S1:** List of primers

1286

| S.No | Gene                                                | Accession ID | Orientation | Sequence              |
|------|-----------------------------------------------------|--------------|-------------|-----------------------|
| 1    | <i>Chloride channel A (AtCLC-A)</i>                 | AT5G40890    | Forward     | GCTTCACTCATGGCTGGTTC  |
|      |                                                     |              | Reverse     | CATCCACGGCTCTGGATTTG  |
| 2    | <i>Nitrate transporter (AtNPF1.2)</i>               | AT1G52190    | Forward     | CGGTTTAGGAATGGCTGTGG  |
|      |                                                     |              | Reverse     | GGACCATACGACCAGCTACA  |
| 3    | <i>High affinity nitrate transporter (AtNRT2.1)</i> | AT1G08090    | Forward     | TCTTCTCCTTCGCCAAACCT  |
|      |                                                     |              | Reverse     | CTCCCATCACGAGCCTAGAG  |
| 4    | <i>High affinity nitrate transporter (AtNRT2.2)</i> | AT1G08100    | Forward     | AGCGGGGATTATAGCAGCAT  |
|      |                                                     |              | Reverse     | CACACAAAAGAGACCACCGG  |
| 5    | <i>High affinity nitrate transporter (AtNRT2.4)</i> | AT5G60770    | Forward     | GTTTCATGATCGGGTTCTGCC |
|      |                                                     |              | Reverse     | TGAAGGACGTGGACCCTAAC  |
| 6    | <i>Pathogenesis related-1 (AtPR1)</i>               | AT2G14610    | Forward     | AGGCACGAGGAGCGGTAGG   |
|      |                                                     |              | Reverse     | CATGTTACGGCGGAGACG    |
| 7    | <i><math>\beta</math>-1,3-Glucanase (AtPR2)</i>     | AT3G57260    | Forward     | TGGTGTGAGATTCCGGTACA  |
|      |                                                     |              | Reverse     | TCATCCCTGAACCTTCCTTG  |
| 8    | <i>Pathogenesis related-gene 5 (AtPR5)</i>          | AT1G75040    | Forward     | CGTACAGGCTGCAACTTTGA  |
|      |                                                     |              | Reverse     | TGAATTCAGCCAGAGTGACG  |
| 9    | <i>Phenyl Ammonia Lyase1 (AtPAL1)</i>               | AT2G37040    | Forward     | GGCAGTGCTACCGAAAGAAG  |
|      |                                                     |              | Reverse     | TCTCCGGTCAAAGCTCTGT   |
| 10   | <i>SAR Deficient 1 (AtSARD1)</i>                    | AT1G73805    | Forward     | GCGATGACTGAAGCGATTGT  |
|      |                                                     |              | Reverse     | CAGTGTGATGTGGCGAGAG   |
| 11   | Non-expresser of PR genes                           | At1g64280    | Forward     | GAATCCGTCTTTGACTCGCC  |

|    |                                                   |           |         |                      |
|----|---------------------------------------------------|-----------|---------|----------------------|
|    | <i>(AtNPR1)</i>                                   |           | Reverse | GCGGTGTTGTTGGAGTCTTT |
| 12 | <i>TGA1A-related gene 3 (AtTGA3)</i>              | At1g22070 | Forward | CGCCCATCCGAGCTTTTAAA |
|    |                                                   |           | Reverse | ATGCTTTCGACCAAACCCTG |
| 13 | <i>Defective in Induced Resistance 1 (AtDIR1)</i> | At5g48485 | Forward | CATGAGCCAGGATGAGTTGA |
|    |                                                   |           | Reverse | ACTGTTTGGGGAGAGCAGAA |

1287

1288
